# Supplementary material
Source: PubMed Central journal article supplement (PMC4626285)
Supplement: NIHMS718020-supplement-1.pdf [file NIHMS718020-supplement-1.pdf]

# Supplementary Information for “Partitioning heritability by functional category using genome-wide association summary statistics”

## Supplementary note.

**Derivation of Equation (1).** We begin with a derivation of Equation (1) in a sample with no population structure or other confounding. The derivation of the intercept term in the presence of confounding is identical to the derivation in previous work.<sup>15</sup> We do not assume here that the categories are disjoint.

Let  $y_i$  be a quantitative phenotype in individual  $i$ , standardized to mean 0 and variance 1 in the population, and let  $X_{ij}$  be the genotype of individual  $i$  at the  $j$ -th SNP, standardized so that for each SNP  $j$ ,  $X_{ij}$  has mean 0 and variance 1 in the population. We will assume a linear model:

$$y_i = \sum_{j \in G} X_{ij} \beta_j(G) + \epsilon_i,$$

where  $G$  is some fixed set of SNPs,  $\beta_j(G)$  is the effect size of SNP  $j$ , and  $\epsilon_i$  is mean-0 noise.

Letting  $M = |G|$ , we define  $\beta(G) = (\beta_1(G), \dots, \beta_M(G))$  as the hypothetical result of multiple linear regression of  $y$  on  $X$  at infinite sample size. Thus,  $\beta(G)$  depends on the set  $G$ ; for example, if  $G$  is the set of genotyped SNPs then  $\beta_j(G)$  includes the causal effects of non-typed SNPs that are tagged by SNP  $j$ , whereas if  $G$  contains all SNPs, then  $\beta_j(G)$  will reflect only the true effect at SNP  $j$ .

We will define the heritability of the set  $G$  of SNPs to be

$$h_G^2 = \sum_{j \in G} \beta_j(G)^2$$

and the heritability of a category  $\mathcal{C} \subset G$  to be

$$h_G^2(\mathcal{C}) = \sum_{j \in \mathcal{C}} \beta_j(G)^2.$$

The definition of  $h_G^2(\mathcal{C})$  depends on both  $G$  and  $\mathcal{C}$ ; for example, if  $\mathcal{C}$  is the set of SNPs with minor allele frequency (MAF) greater than 5%,  $h_G^2(\mathcal{C})$  will be larger if  $G = \mathcal{C}$  than if  $G$  contains SNPs with lower

MAF since in the first case  $h_G^2(\mathcal{C})$  includes tagged effects of low-frequency SNPs, whereas in the second case the low-frequency effects are included in  $h_G^2(G \setminus \mathcal{C})$ . From now on, we will omit the dependence on  $G$ , considering it to be fixed.

Suppose that we have a sample of  $N$  individuals. Let  $y = (y_1, \dots, y_N)$ , and let  $X$  be the  $N \times M$  matrix of standardized genotypes. (We will assume that our sample is large enough that standardizing each SNP within our sample is roughly equivalent to standardizing each SNP in the population.) Let  $\epsilon = (\epsilon_1, \dots, \epsilon_N)$  be a vector of residuals. Then we can write

$$y = X\beta + \epsilon.$$

Let  $\hat{\beta}_j$  be the estimate of the marginal effect of SNP  $j$  in our sample, given by

$$\hat{\beta}_j := \frac{1}{N} X_j^T y,$$

where  $X_j$  is the  $j$ -th column of  $X$ . Define  $\chi^2$  statistics  $\chi_j^2 := N\hat{\beta}_j^2$ .

Substituting  $y = X\beta + \epsilon$  into the the definition of  $\hat{\beta}_j$ , we get

$$\begin{aligned} \hat{\beta}_j &= \frac{1}{N} X_j^T (X\beta + \epsilon) \\ &= \frac{1}{N} X_j^T X\beta + \frac{1}{N} X_j^T \epsilon \\ &= \sum_k \left( \frac{1}{N} X_j^T X_k \right) \beta_k + \frac{1}{N} X_j^T \epsilon \\ &= \sum_k \hat{r}_{jk} \beta_k + \epsilon'_j \end{aligned}$$

where  $\hat{r}_{jk} := \frac{1}{N} X_j^T X_k$  is the in-sample correlation between SNPs  $j$  and  $k$ , and  $\epsilon'_j = X_j^T \epsilon / N$ . Note that  $\epsilon'_j$  has mean 0 and variance  $\sigma_e^2 / N$ .

We will model  $\beta$  as a mean-0 random vector with independent entries. We allow the variance of  $\beta_j$  to depend on the functional categories that we include in our model; i.e., we have  $C$  functional categories  $\mathcal{C}_1, \dots, \mathcal{C}_C \subset \{1, \dots, M\}$  and we model the variance of  $\beta_j$  as

$$\text{Var}(\beta_j) = \sum_{c: j \in \mathcal{C}_c} \tau_c. \quad (2)$$

In the case that the  $\mathcal{C}_c$  are disjoint, we will have  $\tau_c = h^2(\mathcal{C}_c) / M(\mathcal{C}_c)$ , where  $M(\mathcal{C}_c)$  is the number of

SNPs in  $\mathcal{C}_c$ . Each SNP must be in at least one category; in practice we either have a set of categories that forms a disjoint partition of the genome, or we include the set of all SNPs as one of the categories.

Consider the expectation of  $\chi_j^2 = N\hat{\beta}_j^2$ .

$$\begin{aligned}
\mathbb{E}[\chi_j^2] &= N\mathbb{E}\left[\left(\sum_k \hat{r}_{jk}\beta_k + \epsilon'_j\right)^2\right] \\
&= N\sum_k \hat{r}_{jk}^2 \mathbb{E}[\beta_k^2] + N\mathbb{E}[\epsilon'^2_j] \\
&= N\sum_k \hat{r}_{jk}^2 \left(\sum_{c:k\in\mathcal{C}_c} \tau_c\right) + N(\sigma_e^2/N) \\
&= N\sum_c \tau_c \sum_{k\in\mathcal{C}_c} \hat{r}_{jk}^2 + \sigma_e^2,
\end{aligned}$$

where the second equality follows because the random variables are all independent with mean 0.

Let  $r_{jk}$  denote the true correlation between SNPs  $j$  and  $k$  in the underlying population. In an unstructured sample,  $\mathbb{E}[\hat{r}_{jk}^2] \approx r_{jk}^2 + 1/N$ .

We now have

$$\begin{aligned}
\mathbb{E}[\chi_j^2] &= N\sum_c \tau_c \sum_{k\in\mathcal{C}_c} \hat{r}_{jk}^2 + \sigma_e^2 \\
&= N\sum_c \tau_c \sum_{k\in\mathcal{C}_c} (\hat{r}_{jk}^2 - 1/N + 1/N) + \sigma_e^2 \\
&= N\sum_c \tau_c \sum_{k\in\mathcal{C}_c} (\hat{r}_{jk}^2 - 1/N) + N\sum_c \tau_c \sum_{k\in\mathcal{C}_c} (1/N) + \sigma_e^2 \\
&\approx N\sum_c \tau_c \sum_{k\in\mathcal{C}_c} r_{jk}^2 + \sum_c \sum_{k\in\mathcal{C}_c} \tau_c + \sigma_e^2 \\
&= N\sum_c \tau_c \sum_{k\in\mathcal{C}_c} r_{jk}^2 + \sum_k \sum_{c:k\in\mathcal{C}_c} \tau_c + \sigma_e^2 \\
&= N\sum_c \tau_c \ell(j, c) + \sum_k \text{Var}(\beta_k) + \sigma_e^2,
\end{aligned}$$

where  $\ell(j, c) := \sum_{k\in\mathcal{C}_c} r_{jk}^2$ . The variance of  $y_j$  is  $\sum_j \text{Var}(\beta_j) + \sigma_e^2$ . Since our phenotype has variance one, we can replace  $\sum_j \text{Var}(\beta_j) + \sigma_e^2$  with 1, giving us our main equation:

$$\mathbb{E}[\chi_j^2] = N\sum_c \tau_c \ell(j, c) + 1 \tag{3}$$

An extension of this derivation to case-control traits is in Bulik-Sullivan et al.<sup>47</sup>

**Outlier removal.** To minimize standard error, we remove outlier SNPs by excluding SNPs  $j$  with  $\chi_j^2 > \max\{80, 0.001N\}$ , where  $N$  is the maximum sample size in the study. We also remove the MHC region from all analyses, because of its unusual LD patterns and genetic architecture.

**Out-of-bounds estimates.** Like other heritability estimation methods, stratified LD score regression can produce heritability estimates that are not between 0 and 1. When unbiasedness is important—for example, when we are averaging estimates over several simulation replicates—we do not adjust these out-of-bounds estimates. However when mean squared error is more important than unbiasedness—for example, when reporting the results of a single analysis—we truncate these estimates to be between 0 and 1. To get a confidence interval around the truncated estimate, we intersect the original confidence interval with the interval  $[0, 1]$ .

**Choice of regression SNPs and reference SNPs.** The derivation above does not incorporate imperfect imputation. Ideally, we would prune our  $\chi^2$  statistics to a set of “regression SNPs” with imputation accuracy above 0.9, but since imputation accuracy is not always available, we instead use HapMap Project Phase 3 (HapMap3<sup>48</sup>) SNPs as a proxy for well-imputed SNPs. Thus, for the purposes of this paper, regression SNPs are always the HapMap3 SNPs.

However, the choice of which SNPs to include in our regression is distinct from the choice of which SNPs we model as causal. It is important that our model allow as many SNPs as possible to contribute causally, since if we use a model with, for example, only HapMap3 SNPs causal then we are assigning causality of any SNP that is tagged by HapMap3 (but not included in HapMap3) to the HapMap3 SNPs that tag it. This is problematic for functional partitioning because the functional categories containing the causal SNP may not be the same as the functional categories of the HapMap3 SNPs that tag it.

Recall that  $h_A^2(B)$  is the heritability of set  $B$  defined using a model that allows any SNP in set  $A$  to be causal. Another way to restate our above point is that we are interested in  $h_{1000G}^2(\mathcal{C})$  rather than  $h_{HapMap3}^2(\mathcal{C})$  because a model that only allows HapMap3 SNPs to be causal is allowing non-HapMap3 heritability to be tagged by HapMap3 SNPs and therefore potentially assigning heritability to the wrong functional category. For this reason, our set of potentially causal SNPs—i.e., the set of SNPs in our reference panel—is the set of 9,254,535 1000G SNPs<sup>24</sup> (see Web Resources) with minor allele count greater than five in the 379 European samples.

However, there is a problem introduced by having many reference panel SNPs that are not well-tagged by regression SNPs: it may be inappropriate to extrapolate the enrichments at well-tagged SNPs to the rare SNPs on our reference panel that are not well-tagged. To better understand this issue, recall that stratified LD score regression for disjoint categories works in two steps. First,  $\chi^2$  is regressed on  $N\ell(j, c)$ , and the resulting regression coefficients are (if the categories are disjoint) per-SNP heritabilities in each category. Second, the per-SNP heritability of each category is multiplied by the number of SNPs in that category to obtain an estimate of the heritability in the category. This multiplication involves an implicit assumption that the per-SNP heritability estimate extends uniformly across the whole category. If the per-SNP heritabilities are estimated using HapMap3 SNPs, and the category contains many rare SNPs, this assumption may no longer hold.

SNPs with  $MAF > 0.05$  (we denote this set of SNPs  $\mathcal{G}$ ) are generally well-tagged by HapMap3 SNPs. So for any category  $\mathcal{C}$ , we can estimate  $h_{1000G}^2(\mathcal{C} \cap \mathcal{G})$  without potentially inaccurate extrapolation simply by multiplying by the per-SNP heritability by the number of SNPs in  $\mathcal{C} \cap \mathcal{G}$  instead of the number of SNPs in  $\mathcal{C}$ . We do this by default, and the proportions of heritability that we report throughout this manuscript are  $h_{1000G}^2(\mathcal{C} \cap \mathcal{G})/h_{1000G}^2(\mathcal{G})$ .

**Regression weights.** There are two considerations for how to weight the regression. First, because of LD, the  $\chi^2$  statistics used in the regression are not independent. To correct for this non-independence, we down-weight each SNP in proportion to its LD to the other SNPs used in the regression. The second problem is heteroskedasticity: the  $\chi^2$  statistic of a SNP with a high LD score has higher variance than the  $\chi^2$  statistic of a SNP with a low LD score, and so we down-weight SNPs with high LD scores.

For over-counting, we compute LD scores within HapMap3 SNPs; call these  $\ell_{hm3}(j)$ . For heteroskedasticity, we compute  $\ell_{1000G}(j, c)$  for all categories  $c$  in our model. The variance of  $\chi_j^2$  is proportional to  $(1 + N \sum_c \tau_c \ell_{1000G}(j, c))^2$ , but we do not have  $\tau_c$ . We use a rough approximation of  $\tau_c$  obtained by taking the mean over regression SNPs of both sides of Equation (3) and assuming that all the  $\tau_c$  are equal. This gives us  $\hat{\tau} = (\bar{\chi}^2 - 1) / (N \cdot \bar{\ell}(j))$ , where  $\bar{\chi}^2$  is the mean of  $\chi_j^2$  and  $\bar{\ell}(j)$  is the mean of  $\sum_c \ell_{1000G}(j, c)$ , both taken over regression SNPs. We then weight SNP  $j$  by the inverse product of the over counting weights and heteroskedasticity weights:

$$w_j := \frac{1}{\ell_{hm3}(j)(1 + N\hat{\tau} \sum_c \ell_{1000G}(j, c))^2}.$$

**Analyzing summary statistics with GC correction.** Artificial deflation of  $\chi^2$  statistics by GC correction causes an equal deflation in the estimates of category-specific heritability and total heritability. Because these two estimates are deflated by the same amount, though,<sup>15</sup> the estimate of proportion of heritability is unaffected. Moreover, statistical tests for heritability enrichment and for  $\tau_c > 0$  remain valid.

Many of the datasets analyzed in this paper have GC correction applied, and so we report proportions of heritability, enrichment, and z-scores/p-values, but we do not report estimates of total heritability or of category-specific heritability.

**Partitioned heritability vs. regression coefficients.** The parameters  $\tau_c$  and  $h^2(\mathcal{C})$  have different interpretations. Because  $h^2(\mathcal{C})$  is defined as the sum of squared effects of SNPs in  $\mathcal{C}$ , it should not depend on the categories chosen to be in the model, and is generally a robust quantity to estimate. On the other hand,  $\tau_c$  is the contribution of category  $\mathcal{C}_c$  after controlling for all other categories in the model; it is defined by the equation  $\text{Var}(\beta_j) = \sum_{c:j \in \mathcal{C}_c} \tau_c$  and depends explicitly on the choice of categories to put in the model.

As a result,  $h^2(\mathcal{C}_c)$  is a more robust quantity, and we report this value as the outcome of our baseline analysis. On the other hand, when comparing cell types, we believe that it is important to control for the overlap of cell-type-specific annotations with other functional categories such as coding. Thus, we rank cell types by the  $P$ -value of  $\tau_c$ , rather than the  $P$ -value of total enrichment,  $(\text{Prop. } h^2) / (\text{Prop. SNPs})$ .

**Simulations: Supplementary Figures 2 and 3.** The data for these two figures is the same as for Figure 1, but here we plot point estimates to assess bias, rather than plotting rejection probabilities to assess power. In Supplementary Figure 2, we display results from the data simulated to have enrichment in the CNS cell-type group, and in Supplementary Figure 3 display results from the null simulations.

**Heritability z-score method for deciding which phenotypes are amenable to stratified LD score regression.** We wanted to run our method on phenotypes for which we would get meaningful results, but we did not want to filter results by what the standard errors were around our estimates. A phenotype will give low standard errors if it is sufficiently polygenic and has high enough sample size and heritability. It is hard to know ahead of time how polygenic a trait is, but these three dimensions are conveniently captured in the z-score of total SNP-heritability, which increases with  $N \cdot h_g^2$  and with proportion of causal SNPs (Figure 1b, and which corresponds closely to power to detect

enrichment (Figure 1c). We chose a cutoff of z-score  $> 7$  for this paper. The z-scores of the datasets analyzed in this paper appear in Supplementary Table 8.

**$Nh_g^2$  method for deciding which phenotypes are amenable to stratified LD score regression.** An alternative method for choosing which phenotypes are amenable to our method is to use a cutoff of  $Nh_g^2$ . The disadvantage is that this statistic does not take into account polygenicity, which is an important determinant of power (Figure 1a). We did not use this as a criterion in this work, but we recommend it to potential users of our method who would like to get a rough idea of whether their dataset has sufficient sample size. In our simulations, a heritability z-score of 7 corresponds to  $Nh_g^2$  of roughly 4,500 for very polygenic traits, and  $Nh_g^2$  of roughly 12,500 for less polygenic traits (Figure 1b).

**Choice of 17 phenotypes to include in the main analysis.** We quantified the combination of sample size and heritability by the z-score of total SNP-heritability in the baseline analysis (see “Heritability z-score method for deciding which phenotypes are amenable to stratified LD score regression” above). We applied our method to all traits with available summary statistics, and removed all traits with a heritability z-score less than 7. We then removed one of each pair of traits with a large genetic correlation ( $> 0.95$ ): we removed college attendance, which has a very high genetic correlation with years of education, and total cholesterol, which has a very high genetic correlation with LDL.<sup>47</sup>

For Crohn’s disease and ulcerative colitis, we used a dataset with 1000 Genomes imputation which was newer than the dataset available at the link in Online Methods.

**Choice of nine traits to include in the meta-analysis of traits** For our meta-analysis over traits, we identified pairs of traits with substantial sample overlap and trait correlation by using the intercept of cross-trait LD score regression.<sup>47</sup> Specifically, for each pair of traits, we computed the genetic covariance intercept on the N1N2 scale, which for quantitative traits estimates phenotypic correlation times sample overlap, and for case-control estimates a related quantity that is high, for example, if two unrelated traits share controls (<sup>47</sup>). This intercept is downwardly biased in the presence of GC correction, so we divided by the square root of the product of the heritability estimates of the two traits to correct for this bias. We identified pairs of traits for which this quantity was at least 15% of the sample size of either of the traits, and we excluded one of each such pair. The remaining set of traits was: Height, BMI, menarche, LDL levels, coronary artery disease, schizophrenia, educational attainment, smoking behavior, and rheumatoid arthritis.

**Choice of traits to include in Figure 5 (Enrichment estimates for selected annotations and traits).** Height, BMI, age at menarche, and schizophrenia are the four traits with the highest combination of SNP-heritability and sample size, which we quantify by the z-score of total heritability in the full baseline analysis. We also included a meta-analysis of immunological diseases, since they have a different pattern of enrichment from other traits; for example FANTOM5 enhancers are very enriched for immunological diseases but not for other traits. This meta-analysis included rheumatoid arthritis and an inflammatory bowel disease dataset that included both Crohn’s disease and ulcerative colitis as cases; we did not include Crohn’s disease and ulcerative colitis separately since the two studies share controls.

**Cell-type specific analysis.** We used all available cell types from the four histone marks, excluding cell lines and cells labeled as cultured cells to limit ourselves to data with the clearest biological interpretation. The resulting cell-type-specific annotations are listed in Supplementary Table 2.

**Custom genotyping arrays.** Stratified LD score regression is not currently applicable to studies using a custom genotyping arrays. For these arrays, SNPs that are more likely to be in large-effect loci also have better coverage, and this dependency is not modeled in the above derivation. In a meta-analysis of several studies, some of which have custom genotyping arrays, coverage is still dependent on effect size in a way that violates model assumptions.

**Cell-type-specificity of super-enhancers.** We were interested in whether we would get increased signal from a cell-type-specific analysis using super-enhancers compared to regular enhancers, and compared to the four histone marks we used in our primary analysis. To test this, we repeated the cell-type-specific analysis described above for super-enhancers and regular enhancers from Hnisz et al.,<sup>18</sup> obtaining a z-score for each cell type in each of six marks (four marks from the primary analysis, plus regular enhancers and super-enhancers from Hnisz et al). Then, for each of the six marks, we computed the average over traits of the highest z-score achieved by any cell type for that trait, obtaining a score that should be higher for a mark with a stronger cell-type-specific signal.

Super-enhancers did not receive a higher score than regular enhancers. In fact, the average top z-score for super-enhancers was 3.0, while the average top z-score for regular enhancers was 4.7. The average top z-scores for the four histone marks used in the primary analysis were 4.9, 3.7, 3.5, and 4.5, respectively.



**Power as a function of annotation size.** Stratified LD score regression has more power to detect enrichment in large categories than in small categories. To quantify this, we performed simulations in which the CNS cell-type group annotation was pruned to be 0.25x, 0.5x, 0.75x, or 1.0x the original size by choosing to drop or keep each region with equal probability. We then simulated phenotypes and summary statistics with the same baseline enrichment, and with enrichment in this new annotation that matched the enrichment of the original CNS cell-type group annotation. We then plotted probability of rejection; the results are displayed in Figure 8 and show a strong dependence of power on category size.

**Members of the ReproGen consortium.** The members of the ReproGen consortium are John RB Perry, Felix Day, Cathy E Elks, Patrick Sulem, Deborah J Thompson, Teresa Ferreira, Chunyan He, Daniel I Chasman, Tnu Esko, Gudmar Thorleifsson, Eva Albrecht, Wei Q Ang, Tanguy Corre, Diana L Cousminer, Bjarke Feenstra, Nora Franceschini, Andrea Ganna, Andrew D Johnson, Sanela Kjellqvist, Kathryn L Lunetta, George McMahon, Ilja M Nolte, Lavinia Paternoster, Eleonora Porcu, Albert V Smith, Lisette Stolk, Alexander Teumer, Natalia T?ernikova, Emmi Tikkanen, Sheila Ulivi, Erin K Wagner, Najaf Amin, Laura J Bierut, Enda M Byrne, JoukeJan Hottenga, Daniel L Koller, Massimo Mangino, Tune H Pers, Laura M YergesArmstrong, Jing Hua Zhao, Irene L Andrulis, Hoda AntonCulver, Femke Atsma, Stefania Bandinelli, Matthias W Beckmann, Javier Benitez, Carl Blomqvist, Stig E Bojesen, Manjeet K Bolla, Bernardo Bonanni, Hiltrud Brauch, Hermann Brenner, Julie E Buring, Jenny ChangClaude, Stephen Chanock, Jinhui Chen, Georgia ChenevixTrench, J. Margriet Colle, Fergus J Couch, David Couper, Andrea D Coveillo, Angela Cox, Kamila Czene, Adamo Pio D’adamio, George Davey Smith, Immaculata De Vivo, Ellen W Demerath, Joe Dennis, Peter Devilee, Aida K Dieffenbach, Alison M Dunning, Gudny Eiriksdottir, Johan G Eriksson, Peter A Fasching, Luigi Ferrucci, Dieter FleschJanys, Henrik Flyger, Tatiana Foroud, Lude Franke, Melissa E Garcia, Montserrat GarcaClosas, Frank Geller, Eco EJ de Geus, Graham G Giles, Daniel F Gudbjartsson, Vilmundur Gudnason, Pascal Gunel, Suiqun Guo, Per Hall, Ute Hamann, Robin Haring, Catharina A Hartman, Andrew C Heath, Albert Hofman, Maartje J Hooning, John L Hopper, Frank B Hu, David J Hunter, David Karasik, Douglas P Kiel, Julia A Knight, VeliMatti Kosma, Zoltan Kutalik, Sandra Lai, Diether Lambrechts, Annika Lindblom, Reedik Mgi, Patrik K Magnusson, Arto Mannermaa, Nicholas G Martin, Gisli Masson, Patrick F McArdle, Wendy L McArdle, Mads Melbye Kyriaki Michailidou, Evelin Mihailov, Lili Milani, Roger L Milne, Heli Nevanlinna, Patrick Neven, Ellen A Nohr, Albertine J Oldehinkel, Ben A Oostra, Aarno Palotie, Munro Peacock, Nancy L Pedersen, Paolo Peterlongo, Julian Peto, Paul DP Pharoah, Dirkje S Postma, Anneli Pouta, Katri Pylks, Paolo Radice, Susan Ring, Fernando Rivadeneira, Antonietta

Robino, Lynda M Rose, Anja Rudolph, Veikko Salomaa, Serena Sanna, David Schlessinger, Marjanka K Schmidt, Mellissa C Southey, Ulla Sovio Meir J Stampfer, Doris Stckl Anna M Storniolo, Nicholas J Timpson Jonathan Tyrer, Jenny A Visser, Peter Vollenweider, Henry Vlzke, Gerard Waeber, Melanie Waldenberger, Henri Wallaschofski, Qin Wang, Gonneke Willemsen, Robert Winqvist, Bruce HR Wolfenbuttel, Margaret J Wright, Australian Ovarian Cancer Study The GENICA Network, kConFab, The LifeLines Cohort Study, The InterAct Consortium, Early Growth Genetics (EGG) Consortium, Dorret I Boomsma, Michael J Econs, KayTee Khaw, Ruth JF Loos, Mark I McCarthy, Grant W Montgomery, John P Rice, Elizabeth A Streeten, Unnur Thorsteinsdottir, Cornelia M van Duijn, Behrooz Z Alizadeh, Sven Bergmann, Eric Boerwinkle, Heather A Boyd, Laura Crisponi, Paolo Gasparini, Christian Gieger, Tamara B Harris, Erik Ingelsson, MarjoRiitta Jrvelin, Peter Kraft, Debbie Lawlor, Andres Metspalu, Craig E Pennell, Paul M Ridker, Harold Snieder, Thorkild IA Srensen, Tim D Spector, David P Strachan, Andr G Uitterlinden, Nicholas J Wareham, Elisabeth Widen, Marek Zygmont, Anna Murray, Douglas F Easton, Kari Stefansson, Joanne M Murabito, Ken K Ong.

**Members of the Schizophrenia Working Group of the Psychiatric Genetics Consortium.** The members of the Schizophrenia Working Group of the Psychiatric Genomics Consortium are Stephan Ripke, Benjamin M. Neale, Aiden Corvin, James T. R. Walters, Kai-How Farh, Peter A. Holmans, Phil Lee, Brendan Bulik-Sullivan, David A. Collier, Hailiang Huang, Tune H. Pers, Ingrid Agartz, Esben Agerbo, Margot Albus, Madeline Alexander, Farooq Amin, Silviu A. Bacanu, Martin Begemann, Richard A. Belliveau Jr, Judit Bene, Sarah E. Bergen, Elizabeth Bevilacqua, Tim B. Bigdeli, Donald W. Black, Anders D. Brglum, Richard Bruggeman, Nancy G. Buccola, Randy L. Buckner, William Byerley, Wiepke Cahn, Guiqing Cai, Dominique Champion, Rita M. Cantor, Vaughan J. Carr, Noa Carrera, Stanley V. Catts, Kimberly D. Chambert, Raymond C. K. Chan, Ronald Y. L. Chen, Eric Y. H. Chen, Wei Cheng, Eric F. C. Cheung, Siow Ann Chong, C. Robert Cloninger, David Cohen, Nadine Cohen, Paul Cormican, Nick Craddock, James J. Crowley, David Curtis, Michael Davidson, Kenneth L. Davis, Franziska Degenhardt, Jurgen Del Favero, Lynn E. DeLisi, Ditte Demontis, Dimitris Dikeos, Timothy Dinan, Srdjan Djurovic, Gary Donohoe, Elodie Drapeau, Jubao Duan, Frank Dudbridge, Naser Durmishi, Peter Eichhammer, Johan Eriksson, Valentina Escott-Price, Laurent Essioux, Ayman H. Fanous, Martilias S. Farrell, Josef Frank, Lude Franke, Robert Freedman, Nelson B. Freimer, Marion Friedl, Joseph I. Friedman, Menachem Fromer, Giulio Genovese, Lyudmila Georgieva, Elliot S. Gershon, Ina Giegling, Paola Giusti-Rodriguez, Stephanie Godard, Jacqueline I. Goldstein, Vera Golimbet, Srihari Gopal, Jacob Gratten, Jakob Grove, Lieuwe de Haan, Christian Hammer, Marian L. Hamshere, Mark

Hansen, Thomas Hansen, Vahram Haroutunian, Annette M. Hartmann, Frans A. Henskens, Stefan Herms, Joel N. Hirschhorn, Per Hoffmann, Andrea Hofman, Mads V. Hollegaard, David M. Hougaard, Masashi Ikeda, Inge Joa, Antonio Juli, Ren S. Kahn, Luba Kalaydjieva, Sena Karachanak-Yankova, Juha Karjalainen, David Kavanagh, Matthew C. Keller, Brian J. Kelly, James L. Kennedy, Andrey Khrunin, Yunjung Kim, Janis Klovinis, James A. Knowles, Bettina Konte, Vaidutis Kucinskas, Zita Ausrele Kucinskiene, Hana Kuzelova-Ptackova, Anna K. Khler, Claudine Laurent, Jimmy Lee Chee Keong, S. Hong Lee, Sophie E. Legge, Bernard Lerer, Miaoxin Li, Tao Li, Kung-Yee Liang, Jeffrey Lieberman, Svetlana Limborska, Carmel M. Loughland, Jan Lubinski, Jouko Lnnqvist, Milan Macek Jr, Patrik K. E. Magnusson, Brion S. Maher, Wolfgang Maier, Jacques Mallet, Sara Marsal, Manuel Mattheisen, Morten Mattingsdal, Robert W. McCarley, Colm McDonald, Andrew M. McIntosh, Sandra Meier, Carin J. Meijer, Bela Melegh, Ingrid Melle, Raquelle I. Mesholam-Gately, Andres Metspalu, Patricia T. Michie, Lili Milani, Vihra Milanova, Younes Mokrab, Derek W. Morris, Ole Mors, Preben B. Mortensen, Kieran C. Murphy, Robin M. Murray, Inez Myin-Germeys, Bertram Miller-Myhsok, Mari Nelis, Igor Nenadic, Deborah A. Nertney, Gerald Nestadt, Kristin K. Nicodemus, Liene Nikitina-Zake, Laura Nisenbaum, Annelie Nordin, Eadbhard O'Callaghan, Colm O'Dushlaine, F. Anthony O'Neill, Sang-Yun Oh, Ann Olincy, Line Olsen, Jim Van Os, Psychosis Endophenotypes International Consortium, Christos Pantelis, George N. Papadimitriou, Sergi Papiol, Elena Parkhomenko, Michele T. Pato, Tiina Paunio, Milica Pejovic-Milovancevic, Diana O. Perkins, Olli Pietilinen, Jonathan Pimm, Andrew J. Pocklington, John Powell, Alkes Price, Ann E. Pulver, Shaun M. Purcell, Digby Quested, Henrik B. Rasmussen, Abraham Reichenberg, Mark A. Reimers, Alexander L. Richards, Joshua L. Roffman, Panos Roussos, Douglas M. Ruderfer, Veikko Salomaa, Alan R. Sanders, Ulrich Schall, Christian R. Schubert, Thomas G. Schulze, Sibylle G. Schwab, Edward M. Scolnick, Rodney J. Scott, Larry J. Seidman, Jianxin Shi, Engilbert Sigurdsson, Teimuraz Silagadze, Jeremy M. Silverman, Kang Sim, Petr Slominsky, Jordan W. Smoller, Hon-Cheong So, ChrisC. A. Spencer, Eli A. Stahl, Hreinn Stefansson, Stacy Steinberg, Elisabeth Stogmann, Richard E. Straub, Eric Strengman, Jana Strohmaier, T. Scott Stroup, Mythily Subramaniam, Jaana Suvisaari, Dragan M. Svrakic, Jin P. Szatkiewicz, Erik Sderman, Srinivas Thirumalai, Draga Toncheva, Paul A. Tooney, Sarah Tosato, Juha Veijola, John Waddington, Dermot Walsh, Dai Wang, Qiang Wang, Bradley T. Webb, Mark Weiser, Dieter B. Wildenauer, Nigel M. Williams, Stephanie Williams, Stephanie H. Witt, Aaron R. Wolen, Emily H. M. Wong, Brandon K. Wormley, Jing Qin Wu, Hualin Simon Xi, Clement C. Zai, Xuebin Zheng, Fritz Zimprich, Naomi R. Wray, Kari Stefansson, Peter M. Visscher, Wellcome Trust Case-Control Consortium, Rolf Adolfsson, Ole A. Andreassen, Douglas H. R. Blackwood, Elvira Bramon, Joseph D. Buxbaum, Anders D.

Brglum, Sven Cichon, Ariel Darvasi, Enrico Domenici, Hannelore Ehrenreich, Tnu Esko, Pablo V. Gejman, Michael Gill, Hugh Gurling, Christina M. Hultman, Nakao Iwata, Assen V. Jablensky, Erik G. Jansson, Kenneth S. Kendler, George Kirov, Jo Knight, Todd Lencz, Douglas F. Levinson, Qingqin S. Li, Jianjun Liu, Anil K. Malhotra, Steven A. McCarroll, Andrew McQuillin, Jennifer L. Moran, Preben B. Mortensen, Bryan J. Mowry, Markus M. Nthen, Roel A. Ophoff, Michael J. Owen, Aarno Palotie, Carlos N. Pato, Tracey L. Petryshen, Danielle Posthuma, Marcella Rietschel, Brien P. Riley, Dan Rujescu, Pak C. Sham, Pamela Sklar, David St Clair, Daniel R. Weinberger, Jens R. Wendland, Thomas Werge, Mark J. Daly, Patrick F. Sullivan, and Michael C. O'Donovan.

**Members of the RACI consortium.** The members of the RACI consortium who contributed to the data used here are Yukinori Okada, Robert Graham, Arun Manoharan, Ward Ortmann, Tushar Bhangale, Joshua Denny, Robert Carroll, Anne Eyler, Jeffrey Greenberg, Joel Kremer, Dimitrios Pappas, Gang Xie, Ed Keystone, Eli Stahl, Dorothee Diogo, Jing Cui, Katherine Liao, Marieke Coenen, Piet van Riel, Mart van de Laar, Henk-Jan Guchelaar, Tom Huizinga, Philippe Dieud, Xavier Mariette, S. Louis Bridges Jr., Alexandra Zhernakova, Rene Toes, Paul Tak, Corinne Miceli-Richard, Javier Martin, Miguel Gonzalez-Gay, Luis Rodriguez-Rodriguez, Solbritt Rantap-Dahlqvist, Lisbeth rlestig, Steve Eyre, John Bowes, Anne Barton, Niek de Vries, Larry Moreland, Lindsey Criswell, Elizabeth Karlson, Jane Worthington, Leonid Padyukov, Lars Klareskog, Peter Gregersen, Soumya Raychaudhuri, Timothy Behrens, Katherine Siminovitch, Robert Plenge

| Annotation            | Prop. SNPs | Mean segment length (bp) |
|-----------------------|------------|--------------------------|
| Coding                | 0.015      | 315                      |
| Conserved             | 0.026      | 34                       |
| CTCF                  | 0.024      | 490                      |
| DGF                   | 0.138      | 208                      |
| DHS                   | 0.168      | 358                      |
| FANTOM5 Enhancer      | 0.004      | 289                      |
| Enhancer              | 0.063      | 678                      |
| Fetal DHS             | 0.085      | 339                      |
| H3K27ac <sup>18</sup> | 0.391      | 12411                    |
| H3K27ac <sup>17</sup> | 0.269      | 1051                     |
| H3K4me1               | 0.427      | 1676                     |
| H3K4me3               | 0.133      | 941                      |
| H3K9ac                | 0.126      | 964                      |
| Intron                | 0.387      | 6537                     |
| PromoterFlanking      | 0.008      | 266                      |
| Promoter              | 0.031      | 4192                     |
| Repressed             | 0.461      | 572                      |
| Super-enhancer        | 0.168      | 54744                    |
| TFBS                  | 0.132      | 509                      |
| Transcribed           | 0.345      | 484                      |
| TSS                   | 0.018      | 813                      |
| 3-prime UTR           | 0.011      | 844                      |
| 5-prime UTR           | 0.005      | 197                      |
| Weak Enhancer         | 0.021      | 249                      |

Supplementary Table 1: Annotations used. For DHS, H3K4me1, H3K4me3, and H3K9ac, we include peaks and regions as two annotations. For the annotations from the Hoffman segmentation,<sup>19</sup> we union over six cell lines for each category except Repressed, where we take an intersection instead. We also include a 500bp window around each annotation as a separate annotation in the model.

| Cell type              | Mark    | Cell-type group  |
|------------------------|---------|------------------|
| Fetal adrenal          | H3K4me1 | Adrenal/Pancreas |
| Fetal adrenal          | H3K4me3 | Adrenal/Pancreas |
| Pancreas               | H3K4me1 | Adrenal/Pancreas |
| Pancreas               | H3K4me3 | Adrenal/Pancreas |
| Pancreatic islets      | H3K27ac | Adrenal/Pancreas |
| Pancreatic islets      | H3K4me1 | Adrenal/Pancreas |
| Pancreatic islets      | H3K4me1 | Adrenal/Pancreas |
| Pancreatic islets      | H3K4me3 | Adrenal/Pancreas |
| Pancreatic islets      | H3K4me3 | Adrenal/Pancreas |
| Pancreatic islets      | H3K9ac  | Adrenal/Pancreas |
| Angular gyrus          | H3K27ac | CNS              |
| Angular gyrus          | H3K4me1 | CNS              |
| Angular gyrus          | H3K4me3 | CNS              |
| Angular gyrus          | H3K9ac  | CNS              |
| Anterior caudate       | H3K27ac | CNS              |
| Anterior caudate       | H3K4me1 | CNS              |
| Anterior caudate       | H3K4me3 | CNS              |
| Anterior caudate       | H3K9ac  | CNS              |
| Cingulate gyrus        | H3K27ac | CNS              |
| Cingulate gyrus        | H3K4me1 | CNS              |
| Cingulate gyrus        | H3K4me3 | CNS              |
| Cingulate gyrus        | H3K9ac  | CNS              |
| Fetal brain            | H3K4me1 | CNS              |
| Fetal brain            | H3K4me3 | CNS              |
| Fetal brain            | H3K4me3 | CNS              |
| Fetal brain            | H3K9ac  | CNS              |
| Germinal matrix        | H3K4me3 | CNS              |
| Hippocampus middle     | H3K27ac | CNS              |
| Hippocampus middle     | H3K4me1 | CNS              |
| Hippocampus middle     | H3K4me3 | CNS              |
| Hippocampus middle     | H3K9ac  | CNS              |
| Inferior temporal lobe | H3K27ac | CNS              |
| Inferior temporal lobe | H3K4me1 | CNS              |
| Inferior temporal lobe | H3K4me3 | CNS              |
| Inferior temporal lobe | H3K9ac  | CNS              |
| Mid frontal lobe       | H3K27ac | CNS              |
| Mid frontal lobe       | H3K4me1 | CNS              |
| Mid frontal lobe       | H3K4me3 | CNS              |
| Mid frontal lobe       | H3K9ac  | CNS              |

|                                   |         |                  |
|-----------------------------------|---------|------------------|
| Neurosphere                       | H3K27ac | CNS              |
| Substantia nigra                  | H3K27ac | CNS              |
| Substantia nigra                  | H3K4me1 | CNS              |
| Substantia nigra                  | H3K4me3 | CNS              |
| Substantia nigra                  | H3K9ac  | CNS              |
| Aorta                             | H3K4me3 | Cardiovascular   |
| Fetal heart                       | H3K4me1 | Cardiovascular   |
| Fetal heart                       | H3K4me3 | Cardiovascular   |
| Fetal heart                       | H3K9ac  | Cardiovascular   |
| Fetal lung                        | H3K4me1 | Cardiovascular   |
| Fetal lung                        | H3K4me3 | Cardiovascular   |
| Fetal lung                        | H3K9ac  | Cardiovascular   |
| Left Ventricle                    | H3K4me1 | Cardiovascular   |
| Left Ventricle                    | H3K4me3 | Cardiovascular   |
| Lung                              | H3K4me1 | Cardiovascular   |
| Lung                              | H3K4me3 | Cardiovascular   |
| Right atrium                      | H3K4me1 | Cardiovascular   |
| Right atrium                      | H3K4me3 | Cardiovascular   |
| Right ventricle                   | H3K4me1 | Cardiovascular   |
| Right ventricle                   | H3K4me3 | Cardiovascular   |
| Breast fibroblast primary         | H3K4me1 | Connective/Bone  |
| Breast fibroblast primary         | H3K4me3 | Connective/Bone  |
| Chondrogenic dif                  | H3K27ac | Connective/Bone  |
| Osteoblast                        | H3K27ac | Connective/Bone  |
| Penis foreskin fibroblast primary | H3K4me1 | Connective/Bone  |
| Penis foreskin fibroblast primary | H3K4me3 | Connective/Bone  |
| Colon smooth muscle               | H3K27ac | Gastrointestinal |
| Colon smooth muscle               | H3K4me1 | Gastrointestinal |
| Colon smooth muscle               | H3K4me3 | Gastrointestinal |
| Colon smooth muscle               | H3K9ac  | Gastrointestinal |
| Colonic mucosa                    | H3K27ac | Gastrointestinal |
| Colonic mucosa                    | H3K4me1 | Gastrointestinal |
| Colonic mucosa                    | H3K4me3 | Gastrointestinal |
| Colonic mucosa                    | H3K9ac  | Gastrointestinal |
| Duodenum Mucosa                   | H3K4me1 | Gastrointestinal |
| Duodenum Mucosa                   | H3K4me3 | Gastrointestinal |
| Duodenum Mucosa                   | H3K9ac  | Gastrointestinal |
| Duodenum mucosa                   | H3K27ac | Gastrointestinal |
| Duodenum smooth muscle            | H3K27ac | Gastrointestinal |
| Duodenum smooth muscle            | H3K4me1 | Gastrointestinal |

|                        |         |                  |
|------------------------|---------|------------------|
| Duodenum smooth muscle | H3K4me3 | Gastrointestinal |
| Esophagus              | H3K4me1 | Gastrointestinal |
| Esophagus              | H3K4me3 | Gastrointestinal |
| Fetal large intestine  | H3K4me1 | Gastrointestinal |
| Fetal large intestine  | H3K4me3 | Gastrointestinal |
| Fetal small intestine  | H3K4me1 | Gastrointestinal |
| Fetal small intestine  | H3K4me3 | Gastrointestinal |
| Fetal stomach          | H3K4me1 | Gastrointestinal |
| Fetal stomach          | H3K4me3 | Gastrointestinal |
| Gastric                | H3K4me1 | Gastrointestinal |
| Gastric                | H3K4me3 | Gastrointestinal |
| Rectal mucosa          | H3K27ac | Gastrointestinal |
| Rectal mucosa          | H3K4me1 | Gastrointestinal |
| Rectal mucosa          | H3K4me3 | Gastrointestinal |
| Rectal mucosa          | H3K9ac  | Gastrointestinal |
| Rectal smooth muscle   | H3K27ac | Gastrointestinal |
| Rectal smooth muscle   | H3K4me1 | Gastrointestinal |
| Rectal smooth muscle   | H3K4me3 | Gastrointestinal |
| Rectal smooth muscle   | H3K9ac  | Gastrointestinal |
| Sigmoid colon          | H3K4me1 | Gastrointestinal |
| Sigmoid colon          | H3K4me3 | Gastrointestinal |
| Small intestine        | H3K4me1 | Gastrointestinal |
| Small intestine        | H3K4me3 | Gastrointestinal |
| Stomach mucosa         | H3K4me1 | Gastrointestinal |
| Stomach mucosa         | H3K4me3 | Gastrointestinal |
| Stomach mucosa         | H3K9ac  | Gastrointestinal |
| Stomach smooth muscle  | H3K27ac | Gastrointestinal |
| Stomach smooth muscle  | H3K4me1 | Gastrointestinal |
| Stomach smooth muscle  | H3K4me3 | Gastrointestinal |
| Stomach smooth muscle  | H3K9ac  | Gastrointestinal |
| CD14                   | H3K27ac | Immune           |
| CD14 primary           | H3K4me1 | Immune           |
| CD14 primary           | H3K4me3 | Immune           |
| CD15 primary           | H3K4me1 | Immune           |
| CD15 primary           | H3K4me3 | Immune           |
| CD19                   | H3K27ac | Immune           |
| CD19 primary (BI)      | H3K4me1 | Immune           |
| CD19 primary (BI)      | H3K4me3 | Immune           |
| CD19 primary (UW)      | H3K4me1 | Immune           |
| CD19 primary (UW)      | H3K4me3 | Immune           |



|                                                     |         |        |
|-----------------------------------------------------|---------|--------|
| CD20                                                | H3K27ac | Immune |
| CD25+ CD127- Treg                                   | H3K27ac | Immune |
| CD25- CD45RA+ naive                                 | H3K27ac | Immune |
| CD25- IL17+ Th17 stim                               | H3K27ac | Immune |
| CD25- IL17- Th stim MACS                            | H3K27ac | Immune |
| CD25int CD127+ Tmem                                 | H3K27ac | Immune |
| CD3 primary                                         | H3K27ac | Immune |
| CD3 primary (BI)                                    | H3K4me1 | Immune |
| CD3 primary (BI)                                    | H3K4me3 | Immune |
| CD3 primary (UW)                                    | H3K4me1 | Immune |
| CD3 primary (UW)                                    | H3K4me3 | Immune |
| CD34 primary                                        | H3K4me1 | Immune |
| CD34 primary                                        | H3K4me3 | Immune |
| CD4 memory primary                                  | H3K4me1 | Immune |
| CD4 memory primary                                  | H3K4me3 | Immune |
| CD4 naive primary                                   | H3K4me1 | Immune |
| CD4 naive primary                                   | H3K4me3 | Immune |
| CD4 primary                                         | H3K4me3 | Immune |
| CD4+ CD25+ CD127- Treg primary                      | H3K4me1 | Immune |
| CD4+ CD25+ CD127- Treg primary                      | H3K4me3 | Immune |
| CD4+ CD25- CD45R0+ memory primary                   | H3K4me1 | Immune |
| CD4+ CD25- CD45R0+ memory primary                   | H3K4me3 | Immune |
| CD4+ CD25- CD45RA+ naive primary                    | H3K4me1 | Immune |
| CD4+ CD25- CD45RA+ naive primary                    | H3K4me3 | Immune |
| CD4+ CD25- IL17+ PMA Ionomycin stim Th17 primary    | H3K4me1 | Immune |
| CD4+ CD25- IL17+ PMA Ionomycin stim Th17 primary    | H3K4me3 | Immune |
| CD4+ CD25- IL17- PMA Ionomycin stim MACS Th primary | H3K4me1 | Immune |
| CD4+ CD25- IL17- PMA Ionomycin stim MACS Th primary | H3K4me3 | Immune |
| CD4+ CD25- Th primary                               | H3K4me1 | Immune |
| CD4+ CD25- Th primary                               | H3K4me3 | Immune |
| CD4+ CD25int CD127+ Tmem primary                    | H3K4me1 | Immune |
| CD4+ CD25int CD127+ Tmem primary                    | H3K4me3 | Immune |
| CD56 primary                                        | H3K4me1 | Immune |
| CD56 primary                                        | H3K4me3 | Immune |
| CD8 memory primary                                  | H3K4me1 | Immune |
| CD8 memory primary                                  | H3K4me3 | Immune |
| CD8 naive primary (BI)                              | H3K4me1 | Immune |
| CD8 naive primary (BI)                              | H3K4me3 | Immune |
| CD8 naive primary (UCSF-UBC)                        | H3K4me1 | Immune |
| CD8 naive primary (UCSF-UBC)                        | H3K4me3 | Immune |

|                                     |         |        |
|-------------------------------------|---------|--------|
| CD8 naive primary (UCSF-UBC)        | H3K9ac  | Immune |
| CD8 primary                         | H3K4me3 | Immune |
| Fetal thymus                        | H3K4me1 | Immune |
| Fetal thymus                        | H3K4me3 | Immune |
| Mobilized CD34                      | H3K27ac | Immune |
| Mobilized CD34 primary              | H3K4me1 | Immune |
| Mobilized CD34 primary              | H3K4me3 | Immune |
| Peripheralblood mononuclear primary | H3K4me1 | Immune |
| Peripheralblood mononuclear primary | H3K4me3 | Immune |
| Peripheralblood mononuclear primary | H3K9ac  | Immune |
| Spleen                              | H3K4me1 | Immune |
| Spleen                              | H3K4me3 | Immune |
| Th0                                 | H3K27ac | Immune |
| Th1                                 | H3K27ac | Immune |
| Th2                                 | H3K27ac | Immune |
| Thymus                              | H3K4me1 | Immune |
| Treg primary                        | H3K4me3 | Immune |
| Fetal kidney                        | H3K9ac  | Kidney |
| Kidney                              | H3K27ac | Kidney |
| Kidney                              | H3K4me1 | Kidney |
| Kidney                              | H3K4me3 | Kidney |
| Kidney                              | H3K9ac  | Kidney |
| Liver                               | H3K27ac | Liver  |
| Liver (BI)                          | H3K4me1 | Liver  |
| Liver (BI)                          | H3K4me3 | Liver  |
| Liver (BI)                          | H3K9ac  | Liver  |
| Liver (UCSD)                        | H3K4me1 | Liver  |
| Liver (UCSD)                        | H3K4me3 | Liver  |
| Adipose nuclei                      | H3K27ac | Other  |
| Adipose nuclei                      | H3K4me1 | Other  |
| Adipose nuclei                      | H3K4me3 | Other  |
| Adipose nuclei                      | H3K9ac  | Other  |
| Breast luminal epithelial           | H3K4me1 | Other  |
| Breast myoepithelial                | H3K4me1 | Other  |
| Breast myoepithelial                | H3K4me3 | Other  |
| Breast myoepithelial                | H3K9ac  | Other  |
| Breast vHMEC                        | H3K4me1 | Other  |
| Breast vHMEC                        | H3K4me3 | Other  |
| Fetal placenta                      | H3K4me1 | Other  |
| Fetal placenta                      | H3K4me3 | Other  |

|                                     |         |                 |
|-------------------------------------|---------|-----------------|
| Ovary                               | H3K4me1 | Other           |
| Ovary                               | H3K4me3 | Other           |
| Penis foreskin keratinocyte primary | H3K4me1 | Other           |
| Penis foreskin keratinocyte primary | H3K4me3 | Other           |
| Penis foreskin keratinocyte primary | H3K9ac  | Other           |
| Penis foreskin melanocyte primary   | H3K4me1 | Other           |
| Penis foreskin melanocyte primary   | H3K4me3 | Other           |
| Placenta amnion                     | H3K4me1 | Other           |
| Placenta amnion                     | H3K4me3 | Other           |
| Placenta chorion                    | H3K4me1 | Other           |
| Placenta chorion                    | H3K4me3 | Other           |
| Fetal leg muscle                    | H3K4me1 | Skeletal muscle |
| Fetal leg muscle                    | H3K4me3 | Skeletal muscle |
| Fetal trunk muscle                  | H3K4me1 | Skeletal muscle |
| Fetal trunk muscle                  | H3K4me3 | Skeletal muscle |
| Psoas muscle                        | H3K4me1 | Skeletal muscle |
| Psoas muscle                        | H3K4me3 | Skeletal muscle |
| Skeletal muscle                     | H3K27ac | Skeletal muscle |
| Skeletal muscle                     | H3K4me1 | Skeletal muscle |
| Skeletal muscle                     | H3K4me3 | Skeletal muscle |
| Skeletal muscle                     | H3K9ac  | Skeletal muscle |

Supplementary Table 2: Cell types used in the cell-type-specific analysis. When the same cell type in the same histone mark from more than one institution was used, the institution is given in parentheses.

| Phenotype               | Reference/consortium                         | <i>N</i> |
|-------------------------|----------------------------------------------|----------|
| Height                  | Lango Allen et al., 2010 Nature              | 133,858  |
| BMI                     | Speliotes et al., 2010 Nat Genet             | 123,912  |
| Age at menarche         | Perry et al., 2014 Nature                    | 132,989  |
| LDL                     | Teslovich et al., 2010 Nature                | 95,454   |
| HDL                     | Teslovich et al., 2010 Nature                | 99,900   |
| Triglycerides           | Teslovich et al., 2010 Nature                | 96,598   |
| Coronary Artery Disease | Schunkert et al., Nat Genet 2011             | 86,995   |
| Type-2 Diabetes         | Morris et al., 2012 Nat Genet                | 69,033   |
| Fasting glucose         | Manning et al., Nat Genet, 2012              | 46,186   |
| Schizophrenia           | SCZ Working Group of the PGC, 2014 Nature    | 70,100   |
| Bipolar Disorder        | Bip Working Group of the PGC, 2011 Nat Genet | 16,731   |
| Anorexia                | Boraska et al., 2014 Mol Psych               | 17,767   |
| Educational attainment  | Rietveld et al., Science 2013                | 101,069  |
| Ever smoked             | TAG Consortium, 2010 Nat Genet               | 74,035   |
| Rheumatoid Arthritis    | Okada et al., 2014 Nature                    | 38,242   |
| Crohn's Disease         | Jostins et al., 2012 Nature                  | 20,883   |
| Ulcerative Colitis      | Jostins et al., 2012 Nature                  | 27,432   |

Supplementary Table 3: Phenotypes used in the main analyses. The average sample size is 73,599.

| Annotation                    | Prop. SNPs | Prop. $h^2$    | Enrichment     | Enrichment P-value |
|-------------------------------|------------|----------------|----------------|--------------------|
| Coding                        | 0.015      | 0.104 (0.012)  | 7.124 (0.842)  | 0.000              |
| Coding + 500bp                | 0.065      | 0.190 (0.030)  | 2.937 (0.467)  | 0.000              |
| Conserved                     | 0.026      | 0.347 (0.039)  | 13.318 (1.503) | 0.000              |
| Conserved + 500bp             | 0.333      | 0.654 (0.026)  | 1.967 (0.078)  | 0.000              |
| CTCF                          | 0.024      | -0.004 (0.019) | -0.165 (0.792) | 0.404              |
| CTCF + 500bp                  | 0.071      | 0.059 (0.019)  | 0.824 (0.273)  | 0.456              |
| DGF                           | 0.138      | 0.358 (0.094)  | 2.602 (0.686)  | 0.020              |
| DGF + 500bp                   | 0.542      | 0.761 (0.069)  | 1.406 (0.128)  | 0.003              |
| DHS peaks                     | 0.112      | 0.224 (0.063)  | 2.004 (0.566)  | 0.056              |
| DHS                           | 0.168      | 0.285 (0.069)  | 1.698 (0.410)  | 0.076              |
| DHS + 500bp                   | 0.499      | 0.787 (0.041)  | 1.579 (0.081)  | 0.000              |
| FANTOM5 Enhancer              | 0.004      | -0.003 (0.009) | -0.727 (2.156) | 0.536              |
| FANTOM5 Enhancer + 500bp      | 0.019      | 0.017 (0.017)  | 0.880 (0.896)  | 0.743              |
| Enhancer                      | 0.063      | 0.239 (0.050)  | 3.767 (0.783)  | 0.000              |
| Enhancer + 500bp              | 0.154      | 0.359 (0.042)  | 2.334 (0.272)  | 0.000              |
| Fetal DHS                     | 0.085      | 0.238 (0.044)  | 2.809 (0.513)  | 0.001              |
| Fetal DHS + 500bp             | 0.285      | 0.590 (0.058)  | 2.071 (0.204)  | 0.000              |
| H3K27ac <sup>18</sup>         | 0.391      | 0.630 (0.054)  | 1.612 (0.138)  | 0.000              |
| H3K27ac <sup>18</sup> + 500bp | 0.423      | 0.664 (0.059)  | 1.572 (0.140)  | 0.000              |
| H3K27ac <sup>17</sup>         | 0.269      | 0.490 (0.054)  | 1.818 (0.200)  | 0.000              |
| H3K27ac <sup>17</sup> + 500bp | 0.336      | 0.611 (0.040)  | 1.818 (0.118)  | 0.000              |
| H3K4me1 peaks                 | 0.171      | 0.447 (0.040)  | 2.611 (0.236)  | 0.000              |
| H3K4me1                       | 0.427      | 0.792 (0.065)  | 1.857 (0.152)  | 0.000              |
| H3K4me1 + 500bp               | 0.609      | 0.910 (0.039)  | 1.493 (0.064)  | 0.000              |
| H3K4me3 peaks                 | 0.042      | 0.158 (0.025)  | 3.775 (0.602)  | 0.000              |
| H3K4me3                       | 0.133      | 0.344 (0.045)  | 2.583 (0.336)  | 0.000              |
| H3K4me3 + 500bp               | 0.255      | 0.487 (0.056)  | 1.905 (0.220)  | 0.000              |
| H3K9ac peaks                  | 0.039      | 0.248 (0.024)  | 6.396 (0.618)  | 0.000              |
| H3K9ac                        | 0.126      | 0.408 (0.056)  | 3.233 (0.441)  | 0.000              |
| H3K9ac + 500bp                | 0.231      | 0.503 (0.040)  | 2.183 (0.172)  | 0.000              |
| Intron                        | 0.387      | 0.462 (0.014)  | 1.192 (0.035)  | 0.005              |
| Intron + 500bp                | 0.397      | 0.521 (0.015)  | 1.313 (0.037)  | 0.000              |
| PromoterFlanking              | 0.008      | 0.004 (0.011)  | 0.448 (1.315)  | 0.617              |
| PromoterFlanking + 500bp      | 0.033      | 0.081 (0.018)  | 2.433 (0.532)  | 0.021              |
| Promoter                      | 0.031      | 0.087 (0.016)  | 2.807 (0.513)  | 0.008              |
| Promoter + 500bp              | 0.039      | 0.080 (0.016)  | 2.061 (0.424)  | 0.018              |
| Repressed                     | 0.461      | 0.285 (0.063)  | 0.618 (0.137)  | 0.006              |
| Repressed + 500bp             | 0.719      | 0.446 (0.049)  | 0.620 (0.068)  | 0.000              |
| Super Enhancer                | 0.168      | 0.304 (0.035)  | 1.803 (0.209)  | 0.000              |
| Super Enhancer + 500bp        | 0.172      | 0.319 (0.037)  | 1.856 (0.216)  | 0.000              |
| TFBS                          | 0.132      | 0.445 (0.063)  | 3.356 (0.478)  | 0.000              |
| TFBS + 500bp                  | 0.343      | 0.503 (0.052)  | 1.465 (0.152)  | 0.005              |
| Transcribed                   | 0.345      | 0.407 (0.038)  | 1.178 (0.111)  | 0.251              |
| Transcribed + 500bp           | 0.763      | 0.721 (0.028)  | 0.945 (0.036)  | 0.104              |
| TSS                           | 0.018      | 0.104 (0.023)  | 5.685 (1.281)  | 0.001              |
| TSS + 500bp                   | 0.035      | 0.172 (0.029)  | 4.948 (0.830)  | 0.000              |
| 3-prime UTR                   | 0.011      | 0.054 (0.009)  | 4.891 (0.857)  | 0.005              |
| 3-prime UTR + 500bp           | 0.027      | 0.074 (0.011)  | 2.731 (0.411)  | 0.003              |
| 5-prime UTR                   | 0.005      | 0.028 (0.008)  | 5.240 (1.387)  | 0.008              |
| 5-prime UTR + 500bp           | 0.028      | 0.065 (0.010)  | 2.341 (0.375)  | 0.001              |
| Weak Enhancer                 | 0.021      | 0.070 (0.023)  | 3.325 (1.090)  | 0.001              |
| Weak Enhancer + 500bp         | 0.089      | 0.199 (0.030)  | 2.238 (0.335)  | 0.000              |

Supplementary Table 4: Proportion of SNP-heritability and enrichment for different functional categories. We display results meta-analyzed across nine traits for each of the 53 annotations, including two distinct H3K27ac annotations (see Online Methods). Although true SNP-heritability is non-negative, we report here unbiased estimates, we can be negative (see “Out-of-bounds estimates”).

| Annotation                    | Prop. SNPs | Prop. $h^2$    | Enrichment     | Enrichment P-value |
|-------------------------------|------------|----------------|----------------|--------------------|
| Coding                        | 0.015      | 0.127 (0.036)  | 8.661 (2.481)  | 0.002              |
| Coding + 500bp                | 0.065      | 0.192 (0.034)  | 2.979 (0.521)  | 0.000              |
| Conserved                     | 0.026      | 0.340 (0.051)  | 13.029 (1.949) | 0.000              |
| Conserved + 500bp             | 0.333      | 0.636 (0.053)  | 1.913 (0.158)  | 0.000              |
| CTCF                          | 0.024      | 0.050 (0.046)  | 2.118 (1.910)  | 0.558              |
| CTCF + 500bp                  | 0.071      | 0.089 (0.047)  | 1.249 (0.668)  | 0.709              |
| DGF                           | 0.138      | 0.585 (0.085)  | 4.253 (0.620)  | 0.000              |
| DGF + 500bp                   | 0.542      | 0.983 (0.066)  | 1.815 (0.123)  | 0.000              |
| DHS peaks                     | 0.112      | 0.429 (0.107)  | 3.837 (0.957)  | 0.004              |
| DHS                           | 0.168      | 0.512 (0.120)  | 3.050 (0.716)  | 0.005              |
| DHS + 500bp                   | 0.499      | 0.787 (0.062)  | 1.579 (0.125)  | 0.000              |
| FANTOM5 Enhancer              | 0.004      | 0.013 (0.019)  | 2.930 (4.429)  | 0.664              |
| FANTOM5 Enhancer + 500bp      | 0.019      | 0.014 (0.023)  | 0.711 (1.225)  | 0.813              |
| Enhancer                      | 0.063      | 0.184 (0.064)  | 2.906 (1.017)  | 0.061              |
| Enhancer + 500bp              | 0.154      | 0.396 (0.054)  | 2.573 (0.353)  | 0.000              |
| Fetal DHS                     | 0.085      | 0.281 (0.089)  | 3.311 (1.049)  | 0.029              |
| Fetal DHS + 500bp             | 0.285      | 0.504 (0.080)  | 1.770 (0.280)  | 0.006              |
| H3K27ac <sup>18</sup>         | 0.391      | 0.782 (0.035)  | 1.999 (0.089)  | 0.000              |
| H3K27ac <sup>18</sup> + 500bp | 0.423      | 0.780 (0.043)  | 1.846 (0.101)  | 0.000              |
| H3K27ac <sup>17</sup>         | 0.269      | 0.533 (0.066)  | 1.978 (0.243)  | 0.000              |
| H3K27ac <sup>17</sup> + 500bp | 0.336      | 0.674 (0.061)  | 2.005 (0.181)  | 0.000              |
| H3K4me1 peaks                 | 0.171      | 0.422 (0.091)  | 2.465 (0.530)  | 0.006              |
| H3K4me1                       | 0.427      | 0.965 (0.074)  | 2.261 (0.173)  | 0.000              |
| H3K4me1 + 500bp               | 0.609      | 0.946 (0.036)  | 1.553 (0.060)  | 0.000              |
| H3K4me3 peaks                 | 0.042      | 0.075 (0.053)  | 1.791 (1.262)  | 0.530              |
| H3K4me3                       | 0.133      | 0.429 (0.071)  | 3.215 (0.531)  | 0.000              |
| H3K4me3 + 500bp               | 0.255      | 0.584 (0.054)  | 2.286 (0.212)  | 0.000              |
| H3K9ac peaks                  | 0.039      | 0.266 (0.060)  | 6.851 (1.542)  | 0.000              |
| H3K9ac                        | 0.126      | 0.558 (0.065)  | 4.428 (0.519)  | 0.000              |
| H3K9ac + 500bp                | 0.231      | 0.602 (0.055)  | 2.612 (0.237)  | 0.000              |
| Intron                        | 0.387      | 0.448 (0.031)  | 1.156 (0.081)  | 0.055              |
| Intron + 500bp                | 0.397      | 0.532 (0.025)  | 1.340 (0.064)  | 0.000              |
| PromoterFlanking              | 0.008      | -0.046 (0.025) | -5.400 (3.020) | 0.038              |
| PromoterFlanking + 500bp      | 0.033      | 0.116 (0.034)  | 3.453 (1.029)  | 0.017              |
| Promoter                      | 0.031      | 0.089 (0.033)  | 2.848 (1.057)  | 0.079              |
| Promoter + 500bp              | 0.039      | 0.101 (0.020)  | 2.603 (0.528)  | 0.003              |
| Repressed                     | 0.461      | 0.115 (0.093)  | 0.248 (0.202)  | 0.000              |
| Repressed + 500bp             | 0.719      | 0.369 (0.038)  | 0.513 (0.054)  | 0.000              |
| Super Enhancer                | 0.168      | 0.384 (0.026)  | 2.280 (0.154)  | 0.000              |
| Super Enhancer + 500bp        | 0.172      | 0.398 (0.024)  | 2.317 (0.137)  | 0.000              |
| TFBS                          | 0.132      | 0.455 (0.083)  | 3.438 (0.629)  | 0.000              |
| TFBS + 500bp                  | 0.343      | 0.682 (0.065)  | 1.984 (0.190)  | 0.000              |
| Transcribed                   | 0.345      | 0.572 (0.094)  | 1.657 (0.273)  | 0.018              |
| Transcribed + 500bp           | 0.763      | 0.652 (0.052)  | 0.854 (0.068)  | 0.032              |
| TSS                           | 0.018      | 0.107 (0.038)  | 5.853 (2.107)  | 0.020              |
| TSS + 500bp                   | 0.035      | 0.174 (0.032)  | 4.991 (0.906)  | 0.000              |
| 3-prime UTR                   | 0.011      | 0.102 (0.032)  | 9.240 (2.858)  | 0.005              |
| 3-prime UTR + 500bp           | 0.027      | 0.118 (0.032)  | 4.380 (1.176)  | 0.004              |
| 5-prime UTR                   | 0.005      | 0.045 (0.022)  | 8.310 (4.068)  | 0.073              |
| 5-prime UTR + 500bp           | 0.028      | 0.069 (0.023)  | 2.470 (0.841)  | 0.084              |
| Weak Enhancer                 | 0.021      | 0.018 (0.043)  | 0.853 (2.025)  | 0.942              |
| Weak Enhancer + 500bp         | 0.089      | 0.109 (0.048)  | 1.229 (0.540)  | 0.670              |

(a) Height

Supplementary Table 5: Proportion of heritability and enrichment for different functional categories for 17 traits.

| Annotation                    | Prop. SNPs | Prop. $h^2$    | Enrichment     | Enrichment P-value |
|-------------------------------|------------|----------------|----------------|--------------------|
| Coding                        | 0.015      | 0.104 (0.027)  | 7.071 (1.809)  | 0.001              |
| Coding + 500bp                | 0.065      | 0.129 (0.032)  | 1.992 (0.501)  | 0.051              |
| Conserved                     | 0.026      | 0.508 (0.059)  | 19.504 (2.259) | 0.000              |
| Conserved + 500bp             | 0.333      | 0.545 (0.068)  | 1.640 (0.205)  | 0.001              |
| CTCF                          | 0.024      | -0.027 (0.049) | -1.135 (2.046) | 0.289              |
| CTCF + 500bp                  | 0.071      | 0.025 (0.046)  | 0.358 (0.643)  | 0.322              |
| DGF                           | 0.138      | 0.034 (0.123)  | 0.249 (0.897)  | 0.405              |
| DGF + 500bp                   | 0.542      | 0.674 (0.068)  | 1.244 (0.125)  | 0.050              |
| DHS peaks                     | 0.112      | 0.125 (0.100)  | 1.123 (0.893)  | 0.891              |
| DHS                           | 0.168      | 0.093 (0.123)  | 0.554 (0.731)  | 0.543              |
| DHS + 500bp                   | 0.499      | 0.890 (0.122)  | 1.785 (0.246)  | 0.003              |
| FANTOM5 Enhancer              | 0.004      | 0.003 (0.018)  | 0.792 (4.138)  | 0.960              |
| FANTOM5 Enhancer + 500bp      | 0.019      | -0.004 (0.026) | -0.218 (1.364) | 0.372              |
| Enhancer                      | 0.063      | 0.259 (0.053)  | 4.083 (0.833)  | 0.000              |
| Enhancer + 500bp              | 0.154      | 0.305 (0.052)  | 1.980 (0.335)  | 0.003              |
| Fetal DHS                     | 0.085      | 0.112 (0.088)  | 1.320 (1.042)  | 0.757              |
| Fetal DHS + 500bp             | 0.285      | 0.572 (0.081)  | 2.008 (0.283)  | 0.001              |
| H3K27ac <sup>18</sup>         | 0.391      | 0.514 (0.037)  | 1.315 (0.095)  | 0.001              |
| H3K27ac <sup>18</sup> + 500bp | 0.423      | 0.564 (0.039)  | 1.334 (0.093)  | 0.001              |
| H3K27ac <sup>17</sup>         | 0.269      | 0.447 (0.059)  | 1.660 (0.219)  | 0.003              |
| H3K27ac <sup>17</sup> + 500bp | 0.336      | 0.557 (0.067)  | 1.657 (0.198)  | 0.002              |
| H3K4me1 peaks                 | 0.171      | 0.394 (0.102)  | 2.298 (0.593)  | 0.022              |
| H3K4me1                       | 0.427      | 0.668 (0.092)  | 1.565 (0.215)  | 0.008              |
| H3K4me1 + 500bp               | 0.609      | 0.880 (0.052)  | 1.445 (0.086)  | 0.000              |
| H3K4me3 peaks                 | 0.042      | 0.150 (0.055)  | 3.583 (1.315)  | 0.061              |
| H3K4me3                       | 0.133      | 0.219 (0.057)  | 1.646 (0.425)  | 0.122              |
| H3K4me3 + 500bp               | 0.255      | 0.405 (0.054)  | 1.585 (0.212)  | 0.005              |
| H3K9ac peaks                  | 0.039      | 0.279 (0.056)  | 7.206 (1.457)  | 0.000              |
| H3K9ac                        | 0.126      | 0.214 (0.065)  | 1.699 (0.519)  | 0.174              |
| H3K9ac + 500bp                | 0.231      | 0.450 (0.051)  | 1.952 (0.222)  | 0.000              |
| Intron                        | 0.387      | 0.424 (0.032)  | 1.094 (0.083)  | 0.249              |
| Intron + 500bp                | 0.397      | 0.490 (0.030)  | 1.233 (0.076)  | 0.002              |
| PromoterFlanking              | 0.008      | 0.004 (0.023)  | 0.477 (2.714)  | 0.847              |
| PromoterFlanking + 500bp      | 0.033      | 0.042 (0.035)  | 1.262 (1.033)  | 0.798              |
| Promoter                      | 0.031      | 0.080 (0.031)  | 2.559 (0.993)  | 0.118              |
| Promoter + 500bp              | 0.039      | 0.060 (0.024)  | 1.565 (0.617)  | 0.359              |
| Repressed                     | 0.461      | 0.321 (0.104)  | 0.696 (0.226)  | 0.174              |
| Repressed + 500bp             | 0.719      | 0.619 (0.032)  | 0.860 (0.045)  | 0.002              |
| Super Enhancer                | 0.168      | 0.217 (0.019)  | 1.289 (0.115)  | 0.012              |
| Super Enhancer + 500bp        | 0.172      | 0.251 (0.022)  | 1.464 (0.129)  | 0.000              |
| TFBS                          | 0.132      | 0.357 (0.087)  | 2.692 (0.657)  | 0.012              |
| TFBS + 500bp                  | 0.343      | 0.438 (0.071)  | 1.275 (0.206)  | 0.186              |
| Transcribed                   | 0.345      | 0.442 (0.088)  | 1.280 (0.256)  | 0.262              |
| Transcribed + 500bp           | 0.763      | 0.775 (0.051)  | 1.015 (0.066)  | 0.820              |
| TSS                           | 0.018      | 0.059 (0.030)  | 3.239 (1.666)  | 0.181              |
| TSS + 500bp                   | 0.035      | 0.097 (0.031)  | 2.792 (0.883)  | 0.048              |
| 3-prime UTR                   | 0.011      | 0.059 (0.022)  | 5.352 (2.001)  | 0.028              |
| 3-prime UTR + 500bp           | 0.027      | 0.054 (0.021)  | 2.013 (0.796)  | 0.206              |
| 5-prime UTR                   | 0.005      | 0.035 (0.018)  | 6.541 (3.285)  | 0.094              |
| 5-prime UTR + 500bp           | 0.028      | 0.055 (0.022)  | 1.984 (0.794)  | 0.219              |
| Weak Enhancer                 | 0.021      | 0.119 (0.039)  | 5.640 (1.834)  | 0.010              |
| Weak Enhancer + 500bp         | 0.089      | 0.236 (0.044)  | 2.658 (0.494)  | 0.001              |

(b) BMI

Supplementary Table 5: Proportion of heritability and enrichment for different functional categories for 17 traits.

| Annotation                    | Prop. SNPs | Prop. $h^2$    | Enrichment     | Enrichment P-value |
|-------------------------------|------------|----------------|----------------|--------------------|
| Coding                        | 0.015      | 0.123 (0.030)  | 8.413 (2.065)  | 0.000              |
| Coding + 500bp                | 0.065      | 0.094 (0.035)  | 1.453 (0.538)  | 0.395              |
| Conserved                     | 0.026      | 0.462 (0.063)  | 17.725 (2.423) | 0.000              |
| Conserved + 500bp             | 0.333      | 0.616 (0.090)  | 1.853 (0.270)  | 0.002              |
| CTCF                          | 0.024      | 0.022 (0.051)  | 0.935 (2.152)  | 0.976              |
| CTCF + 500bp                  | 0.071      | 0.049 (0.053)  | 0.689 (0.750)  | 0.677              |
| DGF                           | 0.138      | 0.207 (0.113)  | 1.508 (0.824)  | 0.538              |
| DGF + 500bp                   | 0.542      | 0.429 (0.084)  | 0.793 (0.156)  | 0.182              |
| DHS peaks                     | 0.112      | 0.008 (0.120)  | 0.071 (1.073)  | 0.383              |
| DHS                           | 0.168      | 0.052 (0.135)  | 0.311 (0.807)  | 0.390              |
| DHS + 500bp                   | 0.499      | 0.631 (0.096)  | 1.265 (0.193)  | 0.181              |
| FANTOM5 Enhancer              | 0.004      | -0.000 (0.022) | -0.028 (5.137) | 0.841              |
| FANTOM5 Enhancer + 500bp      | 0.019      | 0.006 (0.025)  | 0.321 (1.309)  | 0.604              |
| Enhancer                      | 0.063      | 0.137 (0.061)  | 2.163 (0.960)  | 0.234              |
| Enhancer + 500bp              | 0.154      | 0.215 (0.059)  | 1.397 (0.384)  | 0.305              |
| Fetal DHS                     | 0.085      | 0.108 (0.093)  | 1.272 (1.101)  | 0.805              |
| Fetal DHS + 500bp             | 0.285      | 0.291 (0.102)  | 1.020 (0.357)  | 0.955              |
| H3K27ac <sup>18</sup>         | 0.391      | 0.455 (0.037)  | 1.164 (0.093)  | 0.083              |
| H3K27ac <sup>18</sup> + 500bp | 0.423      | 0.489 (0.052)  | 1.158 (0.124)  | 0.209              |
| H3K27ac <sup>17</sup>         | 0.269      | 0.409 (0.071)  | 1.517 (0.264)  | 0.051              |
| H3K27ac <sup>17</sup> + 500bp | 0.336      | 0.486 (0.070)  | 1.446 (0.208)  | 0.036              |
| H3K4me1 peaks                 | 0.171      | 0.471 (0.116)  | 2.747 (0.678)  | 0.011              |
| H3K4me1                       | 0.427      | 0.621 (0.086)  | 1.455 (0.201)  | 0.028              |
| H3K4me1 + 500bp               | 0.609      | 0.847 (0.057)  | 1.391 (0.094)  | 0.000              |
| H3K4me3 peaks                 | 0.042      | 0.211 (0.071)  | 5.042 (1.694)  | 0.020              |
| H3K4me3                       | 0.133      | 0.237 (0.067)  | 1.779 (0.504)  | 0.125              |
| H3K4me3 + 500bp               | 0.255      | 0.308 (0.064)  | 1.207 (0.251)  | 0.414              |
| H3K9ac peaks                  | 0.039      | 0.220 (0.062)  | 5.671 (1.594)  | 0.004              |
| H3K9ac                        | 0.126      | 0.345 (0.066)  | 2.736 (0.523)  | 0.001              |
| H3K9ac + 500bp                | 0.231      | 0.460 (0.055)  | 1.996 (0.238)  | 0.000              |
| Intron                        | 0.387      | 0.437 (0.035)  | 1.129 (0.090)  | 0.152              |
| Intron + 500bp                | 0.397      | 0.537 (0.031)  | 1.353 (0.078)  | 0.000              |
| PromoterFlanking              | 0.008      | 0.020 (0.031)  | 2.394 (3.664)  | 0.704              |
| PromoterFlanking + 500bp      | 0.033      | 0.056 (0.033)  | 1.684 (0.992)  | 0.490              |
| Promoter                      | 0.031      | 0.123 (0.033)  | 3.945 (1.053)  | 0.005              |
| Promoter + 500bp              | 0.039      | 0.116 (0.026)  | 2.995 (0.661)  | 0.003              |
| Repressed                     | 0.461      | 0.385 (0.100)  | 0.835 (0.216)  | 0.446              |
| Repressed + 500bp             | 0.719      | 0.513 (0.038)  | 0.714 (0.053)  | 0.000              |
| Super Enhancer                | 0.168      | 0.213 (0.030)  | 1.264 (0.176)  | 0.135              |
| Super Enhancer + 500bp        | 0.172      | 0.233 (0.029)  | 1.357 (0.171)  | 0.040              |
| TFBS                          | 0.132      | 0.437 (0.098)  | 3.301 (0.738)  | 0.003              |
| TFBS + 500bp                  | 0.343      | 0.427 (0.093)  | 1.244 (0.270)  | 0.368              |
| Transcribed                   | 0.345      | 0.436 (0.086)  | 1.263 (0.250)  | 0.288              |
| Transcribed + 500bp           | 0.763      | 0.681 (0.058)  | 0.893 (0.075)  | 0.156              |
| TSS                           | 0.018      | 0.165 (0.043)  | 9.064 (2.357)  | 0.001              |
| TSS + 500bp                   | 0.035      | 0.167 (0.036)  | 4.786 (1.039)  | 0.000              |
| 3-prime UTR                   | 0.011      | 0.034 (0.022)  | 3.053 (1.945)  | 0.295              |
| 3-prime UTR + 500bp           | 0.027      | 0.047 (0.021)  | 1.762 (0.765)  | 0.319              |
| 5-prime UTR                   | 0.005      | 0.042 (0.021)  | 7.792 (3.845)  | 0.076              |
| 5-prime UTR + 500bp           | 0.028      | 0.059 (0.031)  | 2.129 (1.101)  | 0.301              |
| Weak Enhancer                 | 0.021      | 0.011 (0.046)  | 0.542 (2.157)  | 0.831              |
| Weak Enhancer + 500bp         | 0.089      | 0.113 (0.054)  | 1.274 (0.603)  | 0.651              |

(c) Age at menarche

Supplementary Table 5: Proportion of heritability and enrichment for different functional categories for 17 traits.



| Annotation                    | Prop. SNPs | Prop. $h^2$    | Enrichment       | Enrichment P-value |
|-------------------------------|------------|----------------|------------------|--------------------|
| Coding                        | 0.015      | 0.128 (0.093)  | 8.740 (6.337)    | 0.224              |
| Coding + 500bp                | 0.065      | 0.502 (0.089)  | 7.782 (1.381)    | 0.000              |
| Conserved                     | 0.026      | 0.264 (0.124)  | 10.111 (4.743)   | 0.052              |
| Conserved + 500bp             | 0.333      | 0.811 (0.142)  | 2.438 (0.428)    | 0.001              |
| CTCF                          | 0.024      | 0.179 (0.109)  | 7.506 (4.571)    | 0.140              |
| CTCF + 500bp                  | 0.071      | 0.079 (0.106)  | 1.109 (1.494)    | 0.942              |
| DGF                           | 0.138      | 0.542 (0.191)  | 3.938 (1.388)    | 0.045              |
| DGF + 500bp                   | 0.542      | 0.806 (0.149)  | 1.489 (0.275)    | 0.075              |
| DHS peaks                     | 0.112      | 0.417 (0.189)  | 3.730 (1.692)    | 0.113              |
| DHS                           | 0.168      | 0.505 (0.247)  | 3.008 (1.475)    | 0.167              |
| DHS + 500bp                   | 0.499      | 0.810 (0.161)  | 1.623 (0.323)    | 0.053              |
| FANTOM5 Enhancer              | 0.004      | -0.050 (0.047) | -11.493 (10.765) | 0.257              |
| FANTOM5 Enhancer + 500bp      | 0.019      | -0.006 (0.047) | -0.323 (2.442)   | 0.585              |
| Enhancer                      | 0.063      | 0.500 (0.157)  | 7.895 (2.475)    | 0.007              |
| Enhancer + 500bp              | 0.154      | 0.524 (0.120)  | 3.406 (0.780)    | 0.003              |
| Fetal DHS                     | 0.085      | 0.370 (0.194)  | 4.370 (2.284)    | 0.122              |
| Fetal DHS + 500bp             | 0.285      | 0.783 (0.132)  | 2.746 (0.462)    | 0.000              |
| H3K27ac <sup>18</sup>         | 0.391      | 0.776 (0.092)  | 1.984 (0.236)    | 0.000              |
| H3K27ac <sup>18</sup> + 500bp | 0.423      | 0.962 (0.075)  | 2.277 (0.177)    | 0.000              |
| H3K27ac <sup>17</sup>         | 0.269      | 0.829 (0.155)  | 3.075 (0.574)    | 0.001              |
| H3K27ac <sup>17</sup> + 500bp | 0.336      | 0.772 (0.100)  | 2.298 (0.299)    | 0.000              |
| H3K4me1 peaks                 | 0.171      | 0.430 (0.263)  | 2.512 (1.536)    | 0.333              |
| H3K4me1                       | 0.427      | 1.179 (0.151)  | 2.765 (0.354)    | 0.000              |
| H3K4me1 + 500bp               | 0.609      | 1.056 (0.094)  | 1.733 (0.154)    | 0.000              |
| H3K4me3 peaks                 | 0.042      | 0.069 (0.186)  | 1.658 (4.449)    | 0.881              |
| H3K4me3                       | 0.133      | 0.628 (0.172)  | 4.715 (1.292)    | 0.004              |
| H3K4me3 + 500bp               | 0.255      | 0.933 (0.181)  | 3.652 (0.708)    | 0.000              |
| H3K9ac peaks                  | 0.039      | -0.028 (0.163) | -0.712 (4.213)   | 0.682              |
| H3K9ac                        | 0.126      | 0.751 (0.166)  | 5.951 (1.320)    | 0.000              |
| H3K9ac + 500bp                | 0.231      | 0.832 (0.187)  | 3.607 (0.812)    | 0.001              |
| Intron                        | 0.387      | 0.472 (0.082)  | 1.218 (0.212)    | 0.301              |
| Intron + 500bp                | 0.397      | 0.657 (0.050)  | 1.654 (0.127)    | 0.000              |
| PromoterFlanking              | 0.008      | 0.055 (0.073)  | 6.544 (8.612)    | 0.504              |
| PromoterFlanking + 500bp      | 0.033      | 0.264 (0.087)  | 7.895 (2.596)    | 0.013              |
| Promoter                      | 0.031      | 0.140 (0.073)  | 4.499 (2.352)    | 0.126              |
| Promoter + 500bp              | 0.039      | 0.173 (0.048)  | 4.475 (1.243)    | 0.003              |
| Repressed                     | 0.461      | -0.077 (0.140) | -0.167 (0.304)   | 0.000              |
| Repressed + 500bp             | 0.719      | 0.168 (0.077)  | 0.234 (0.107)    | 0.000              |
| Super Enhancer                | 0.168      | 0.439 (0.059)  | 2.608 (0.350)    | 0.000              |
| Super Enhancer + 500bp        | 0.172      | 0.467 (0.059)  | 2.721 (0.343)    | 0.000              |
| TFBS                          | 0.132      | 0.871 (0.231)  | 6.576 (1.742)    | 0.003              |
| TFBS + 500bp                  | 0.343      | 0.787 (0.152)  | 2.291 (0.442)    | 0.005              |
| Transcribed                   | 0.345      | 0.573 (0.139)  | 1.659 (0.403)    | 0.101              |
| Transcribed + 500bp           | 0.763      | 0.627 (0.106)  | 0.821 (0.139)    | 0.203              |
| TSS                           | 0.018      | 0.086 (0.097)  | 4.746 (5.300)    | 0.468              |
| TSS + 500bp                   | 0.035      | 0.452 (0.083)  | 12.976 (2.372)   | 0.000              |
| 3-prime UTR                   | 0.011      | 0.035 (0.045)  | 3.190 (4.093)    | 0.590              |
| 3-prime UTR + 500bp           | 0.027      | 0.109 (0.041)  | 4.044 (1.526)    | 0.048              |
| 5-prime UTR                   | 0.005      | 0.015 (0.041)  | 2.768 (7.486)    | 0.812              |
| 5-prime UTR + 500bp           | 0.028      | 0.088 (0.069)  | 3.154 (2.465)    | 0.380              |
| Weak Enhancer                 | 0.021      | 0.145 (0.096)  | 6.876 (4.552)    | 0.200              |
| Weak Enhancer + 500bp         | 0.089      | 0.257 (0.109)  | 2.890 (1.225)    | 0.121              |

(d) LDL

Supplementary Table 5: Proportion of heritability and enrichment for different functional categories for 17 traits.

| Annotation                    | Prop. SNPs | Prop. $h^2$    | Enrichment     | Enrichment P-value |
|-------------------------------|------------|----------------|----------------|--------------------|
| Coding                        | 0.015      | 0.058 (0.058)  | 3.986 (3.940)  | 0.449              |
| Coding + 500bp                | 0.065      | 0.309 (0.064)  | 4.788 (0.994)  | 0.000              |
| Conserved                     | 0.026      | 0.269 (0.075)  | 10.339 (2.873) | 0.001              |
| Conserved + 500bp             | 0.333      | 0.582 (0.122)  | 1.749 (0.366)  | 0.052              |
| CTCF                          | 0.024      | -0.049 (0.068) | -2.077 (2.867) | 0.278              |
| CTCF + 500bp                  | 0.071      | 0.032 (0.084)  | 0.453 (1.185)  | 0.641              |
| DGF                           | 0.138      | 0.093 (0.195)  | 0.676 (1.420)  | 0.820              |
| DGF + 500bp                   | 0.542      | 0.735 (0.149)  | 1.358 (0.275)  | 0.184              |
| DHS peaks                     | 0.112      | 0.219 (0.193)  | 1.960 (1.726)  | 0.580              |
| DHS                           | 0.168      | 0.289 (0.190)  | 1.721 (1.132)  | 0.528              |
| DHS + 500bp                   | 0.499      | 0.921 (0.213)  | 1.846 (0.428)  | 0.043              |
| FANTOM5 Enhancer              | 0.004      | 0.001 (0.049)  | 0.162 (11.316) | 0.941              |
| FANTOM5 Enhancer + 500bp      | 0.019      | -0.004 (0.051) | -0.213 (2.698) | 0.653              |
| Enhancer                      | 0.063      | 0.211 (0.125)  | 3.332 (1.972)  | 0.237              |
| Enhancer + 500bp              | 0.154      | 0.512 (0.101)  | 3.327 (0.659)  | 0.001              |
| Fetal DHS                     | 0.085      | 0.091 (0.137)  | 1.079 (1.617)  | 0.961              |
| Fetal DHS + 500bp             | 0.285      | 0.736 (0.115)  | 2.583 (0.405)  | 0.000              |
| H3K27ac <sup>18</sup>         | 0.391      | 0.802 (0.067)  | 2.051 (0.172)  | 0.000              |
| H3K27ac <sup>18</sup> + 500bp | 0.423      | 0.828 (0.072)  | 1.960 (0.171)  | 0.000              |
| H3K27ac <sup>17</sup>         | 0.269      | 0.904 (0.190)  | 3.353 (0.704)  | 0.001              |
| H3K27ac <sup>17</sup> + 500bp | 0.336      | 0.839 (0.082)  | 2.495 (0.244)  | 0.000              |
| H3K4me1 peaks                 | 0.171      | 0.602 (0.221)  | 3.515 (1.289)  | 0.049              |
| H3K4me1                       | 0.427      | 1.055 (0.165)  | 2.474 (0.387)  | 0.000              |
| H3K4me1 + 500bp               | 0.609      | 1.035 (0.093)  | 1.699 (0.153)  | 0.000              |
| H3K4me3 peaks                 | 0.042      | 0.019 (0.129)  | 0.451 (3.084)  | 0.859              |
| H3K4me3                       | 0.133      | 0.530 (0.130)  | 3.975 (0.972)  | 0.002              |
| H3K4me3 + 500bp               | 0.255      | 0.690 (0.111)  | 2.702 (0.435)  | 0.000              |
| H3K9ac peaks                  | 0.039      | 0.240 (0.121)  | 6.195 (3.119)  | 0.107              |
| H3K9ac                        | 0.126      | 0.632 (0.106)  | 5.015 (0.842)  | 0.000              |
| H3K9ac + 500bp                | 0.231      | 0.856 (0.110)  | 3.714 (0.477)  | 0.000              |
| Intron                        | 0.387      | 0.523 (0.070)  | 1.349 (0.180)  | 0.051              |
| Intron + 500bp                | 0.397      | 0.603 (0.048)  | 1.518 (0.120)  | 0.000              |
| PromoterFlanking              | 0.008      | -0.039 (0.038) | -4.590 (4.500) | 0.225              |
| PromoterFlanking + 500bp      | 0.033      | 0.071 (0.058)  | 2.111 (1.724)  | 0.513              |
| Promoter                      | 0.031      | 0.180 (0.073)  | 5.785 (2.343)  | 0.041              |
| Promoter + 500bp              | 0.039      | 0.162 (0.046)  | 4.197 (1.187)  | 0.007              |
| Repressed                     | 0.461      | 0.143 (0.113)  | 0.310 (0.246)  | 0.005              |
| Repressed + 500bp             | 0.719      | 0.312 (0.072)  | 0.434 (0.100)  | 0.000              |
| Super Enhancer                | 0.168      | 0.531 (0.051)  | 3.151 (0.305)  | 0.000              |
| Super Enhancer + 500bp        | 0.172      | 0.535 (0.048)  | 3.120 (0.280)  | 0.000              |
| TFBS                          | 0.132      | 0.358 (0.189)  | 2.706 (1.428)  | 0.236              |
| TFBS + 500bp                  | 0.343      | 0.601 (0.142)  | 1.749 (0.412)  | 0.066              |
| Transcribed                   | 0.345      | 0.445 (0.108)  | 1.289 (0.313)  | 0.346              |
| Transcribed + 500bp           | 0.763      | 0.839 (0.070)  | 1.100 (0.091)  | 0.278              |
| TSS                           | 0.018      | 0.066 (0.057)  | 3.601 (3.138)  | 0.401              |
| TSS + 500bp                   | 0.035      | 0.306 (0.072)  | 8.782 (2.069)  | 0.000              |
| 3-prime UTR                   | 0.011      | -0.014 (0.036) | -1.224 (3.300) | 0.502              |
| 3-prime UTR + 500bp           | 0.027      | 0.071 (0.040)  | 2.623 (1.500)  | 0.271              |
| 5-prime UTR                   | 0.005      | 0.082 (0.041)  | 15.172 (7.504) | 0.064              |
| 5-prime UTR + 500bp           | 0.028      | 0.086 (0.039)  | 3.076 (1.411)  | 0.139              |
| Weak Enhancer                 | 0.021      | 0.081 (0.077)  | 3.859 (3.649)  | 0.438              |
| Weak Enhancer + 500bp         | 0.089      | 0.321 (0.105)  | 3.605 (1.180)  | 0.039              |

(e) HDL

Supplementary Table 5: Proportion of heritability and enrichment for different functional categories for 17 traits.

| Annotation                    | Prop. SNPs | Prop. $h^2$    | Enrichment      | Enrichment P-value |
|-------------------------------|------------|----------------|-----------------|--------------------|
| Coding                        | 0.015      | 0.052 (0.049)  | 3.542 (3.317)   | 0.430              |
| Coding + 500bp                | 0.065      | 0.252 (0.051)  | 3.899 (0.786)   | 0.000              |
| Conserved                     | 0.026      | 0.269 (0.080)  | 10.309 (3.080)  | 0.001              |
| Conserved + 500bp             | 0.333      | 0.664 (0.090)  | 1.997 (0.272)   | 0.001              |
| CTCF                          | 0.024      | -0.019 (0.079) | -0.814 (3.295)  | 0.576              |
| CTCF + 500bp                  | 0.071      | 0.010 (0.077)  | 0.137 (1.078)   | 0.415              |
| DGF                           | 0.138      | 0.237 (0.150)  | 1.724 (1.092)   | 0.506              |
| DGF + 500bp                   | 0.542      | 0.690 (0.108)  | 1.275 (0.199)   | 0.164              |
| DHS peaks                     | 0.112      | 0.145 (0.162)  | 1.293 (1.448)   | 0.839              |
| DHS                           | 0.168      | 0.249 (0.166)  | 1.484 (0.990)   | 0.625              |
| DHS + 500bp                   | 0.499      | 0.941 (0.125)  | 1.886 (0.250)   | 0.001              |
| FANTOM5 Enhancer              | 0.004      | -0.047 (0.030) | -10.766 (6.886) | 0.090              |
| FANTOM5 Enhancer + 500bp      | 0.019      | 0.030 (0.052)  | 1.551 (2.737)   | 0.838              |
| Enhancer                      | 0.063      | 0.232 (0.115)  | 3.657 (1.814)   | 0.137              |
| Enhancer + 500bp              | 0.154      | 0.559 (0.106)  | 3.630 (0.685)   | 0.000              |
| Fetal DHS                     | 0.085      | 0.333 (0.128)  | 3.929 (1.511)   | 0.054              |
| Fetal DHS + 500bp             | 0.285      | 0.649 (0.119)  | 2.276 (0.419)   | 0.006              |
| H3K27ac <sup>18</sup>         | 0.391      | 0.768 (0.060)  | 1.964 (0.152)   | 0.000              |
| H3K27ac <sup>18</sup> + 500bp | 0.423      | 0.759 (0.054)  | 1.797 (0.127)   | 0.000              |
| H3K27ac <sup>17</sup>         | 0.269      | 0.750 (0.149)  | 2.783 (0.551)   | 0.002              |
| H3K27ac <sup>17</sup> + 500bp | 0.336      | 0.797 (0.091)  | 2.373 (0.272)   | 0.000              |
| H3K4me1 peaks                 | 0.171      | 0.132 (0.163)  | 0.772 (0.951)   | 0.810              |
| H3K4me1                       | 0.427      | 0.823 (0.144)  | 1.929 (0.337)   | 0.006              |
| H3K4me1 + 500bp               | 0.609      | 1.181 (0.072)  | 1.939 (0.119)   | 0.000              |
| H3K4me3 peaks                 | 0.042      | 0.121 (0.112)  | 2.907 (2.685)   | 0.480              |
| H3K4me3                       | 0.133      | 0.452 (0.083)  | 3.394 (0.622)   | 0.000              |
| H3K4me3 + 500bp               | 0.255      | 0.736 (0.104)  | 2.881 (0.406)   | 0.000              |
| H3K9ac peaks                  | 0.039      | 0.172 (0.095)  | 4.441 (2.450)   | 0.166              |
| H3K9ac                        | 0.126      | 0.502 (0.088)  | 3.978 (0.699)   | 0.000              |
| H3K9ac + 500bp                | 0.231      | 0.751 (0.108)  | 3.259 (0.469)   | 0.000              |
| Intron                        | 0.387      | 0.475 (0.055)  | 1.225 (0.141)   | 0.113              |
| Intron + 500bp                | 0.397      | 0.550 (0.037)  | 1.385 (0.094)   | 0.000              |
| PromoterFlanking              | 0.008      | 0.050 (0.043)  | 5.945 (5.065)   | 0.335              |
| PromoterFlanking + 500bp      | 0.033      | 0.112 (0.060)  | 3.356 (1.807)   | 0.184              |
| Promoter                      | 0.031      | 0.162 (0.052)  | 5.203 (1.658)   | 0.015              |
| Promoter + 500bp              | 0.039      | 0.153 (0.045)  | 3.962 (1.161)   | 0.019              |
| Repressed                     | 0.461      | 0.081 (0.102)  | 0.176 (0.222)   | 0.001              |
| Repressed + 500bp             | 0.719      | 0.400 (0.066)  | 0.556 (0.091)   | 0.000              |
| Super Enhancer                | 0.168      | 0.395 (0.038)  | 2.346 (0.224)   | 0.000              |
| Super Enhancer + 500bp        | 0.172      | 0.425 (0.035)  | 2.477 (0.203)   | 0.000              |
| TFBS                          | 0.132      | 0.435 (0.159)  | 3.284 (1.204)   | 0.060              |
| TFBS + 500bp                  | 0.343      | 0.545 (0.121)  | 1.586 (0.353)   | 0.093              |
| Transcribed                   | 0.345      | 0.512 (0.097)  | 1.483 (0.281)   | 0.098              |
| Transcribed + 500bp           | 0.763      | 0.582 (0.097)  | 0.763 (0.128)   | 0.075              |
| TSS                           | 0.018      | 0.065 (0.051)  | 3.562 (2.802)   | 0.366              |
| TSS + 500bp                   | 0.035      | 0.290 (0.058)  | 8.341 (1.660)   | 0.000              |
| 3-prime UTR                   | 0.011      | 0.003 (0.037)  | 0.253 (3.373)   | 0.824              |
| 3-prime UTR + 500bp           | 0.027      | 0.057 (0.031)  | 2.101 (1.152)   | 0.329              |
| 5-prime UTR                   | 0.005      | -0.012 (0.025) | -2.291 (4.617)  | 0.473              |
| 5-prime UTR + 500bp           | 0.028      | 0.046 (0.035)  | 1.652 (1.245)   | 0.598              |
| Weak Enhancer                 | 0.021      | 0.047 (0.069)  | 2.237 (3.264)   | 0.702              |
| Weak Enhancer + 500bp         | 0.089      | 0.265 (0.093)  | 2.982 (1.042)   | 0.067              |

(f) Triglycerides

Supplementary Table 5: Proportion of heritability and enrichment for different functional categories for 17 traits.

| Annotation                    | Prop. SNPs | Prop. $h^2$    | Enrichment      | Enrichment P-value |
|-------------------------------|------------|----------------|-----------------|--------------------|
| Coding                        | 0.015      | 0.074 (0.057)  | 5.050 (3.916)   | 0.306              |
| Coding + 500bp                | 0.065      | 0.261 (0.068)  | 4.043 (1.056)   | 0.003              |
| Conserved                     | 0.026      | 0.203 (0.096)  | 7.808 (3.671)   | 0.067              |
| Conserved + 500bp             | 0.333      | 0.568 (0.143)  | 1.708 (0.431)   | 0.094              |
| CTCF                          | 0.024      | -0.040 (0.105) | -1.659 (4.416)  | 0.541              |
| CTCF + 500bp                  | 0.071      | -0.070 (0.122) | -0.980 (1.718)  | 0.233              |
| DGF                           | 0.138      | 0.743 (0.259)  | 5.402 (1.884)   | 0.015              |
| DGF + 500bp                   | 0.542      | 0.860 (0.142)  | 1.587 (0.263)   | 0.032              |
| DHS peaks                     | 0.112      | 0.361 (0.255)  | 3.229 (2.279)   | 0.327              |
| DHS                           | 0.168      | 0.514 (0.266)  | 3.063 (1.585)   | 0.190              |
| DHS + 500bp                   | 0.499      | 0.943 (0.165)  | 1.891 (0.330)   | 0.007              |
| FANTOM5 Enhancer              | 0.004      | -0.040 (0.052) | -9.331 (12.109) | 0.394              |
| FANTOM5 Enhancer + 500bp      | 0.019      | 0.045 (0.064)  | 2.359 (3.335)   | 0.681              |
| Enhancer                      | 0.063      | 0.394 (0.129)  | 6.217 (2.040)   | 0.010              |
| Enhancer + 500bp              | 0.154      | 0.406 (0.119)  | 2.635 (0.774)   | 0.039              |
| Fetal DHS                     | 0.085      | 0.282 (0.202)  | 3.324 (2.378)   | 0.328              |
| Fetal DHS + 500bp             | 0.285      | 0.746 (0.166)  | 2.618 (0.583)   | 0.007              |
| H3K27ac <sup>18</sup>         | 0.391      | 0.727 (0.086)  | 1.859 (0.220)   | 0.000              |
| H3K27ac <sup>18</sup> + 500bp | 0.423      | 0.801 (0.083)  | 1.895 (0.195)   | 0.000              |
| H3K27ac <sup>17</sup>         | 0.269      | 0.639 (0.140)  | 2.370 (0.521)   | 0.008              |
| H3K27ac <sup>17</sup> + 500bp | 0.336      | 0.837 (0.128)  | 2.490 (0.382)   | 0.000              |
| H3K4me1 peaks                 | 0.171      | 0.497 (0.198)  | 2.901 (1.154)   | 0.103              |
| H3K4me1                       | 0.427      | 0.783 (0.163)  | 1.835 (0.383)   | 0.035              |
| H3K4me1 + 500bp               | 0.609      | 1.137 (0.086)  | 1.866 (0.141)   | 0.000              |
| H3K4me3 peaks                 | 0.042      | 0.266 (0.158)  | 6.363 (3.780)   | 0.156              |
| H3K4me3                       | 0.133      | 0.288 (0.127)  | 2.161 (0.956)   | 0.229              |
| H3K4me3 + 500bp               | 0.255      | 0.890 (0.146)  | 3.482 (0.573)   | 0.000              |
| H3K9ac peaks                  | 0.039      | 0.381 (0.142)  | 9.820 (3.659)   | 0.019              |
| H3K9ac                        | 0.126      | 0.686 (0.140)  | 5.439 (1.108)   | 0.000              |
| H3K9ac + 500bp                | 0.231      | 0.788 (0.123)  | 3.418 (0.535)   | 0.000              |
| Intron                        | 0.387      | 0.483 (0.066)  | 1.248 (0.169)   | 0.129              |
| Intron + 500bp                | 0.397      | 0.525 (0.050)  | 1.323 (0.125)   | 0.010              |
| PromoterFlanking              | 0.008      | 0.001 (0.057)  | 0.071 (6.760)   | 0.890              |
| PromoterFlanking + 500bp      | 0.033      | 0.108 (0.070)  | 3.237 (2.104)   | 0.292              |
| Promoter                      | 0.031      | 0.104 (0.071)  | 3.344 (2.279)   | 0.297              |
| Promoter + 500bp              | 0.039      | 0.068 (0.048)  | 1.765 (1.233)   | 0.533              |
| Repressed                     | 0.461      | 0.395 (0.168)  | 0.856 (0.364)   | 0.693              |
| Repressed + 500bp             | 0.719      | 0.359 (0.074)  | 0.499 (0.102)   | 0.000              |
| Super Enhancer                | 0.168      | 0.414 (0.054)  | 2.459 (0.320)   | 0.000              |
| Super Enhancer + 500bp        | 0.172      | 0.415 (0.059)  | 2.418 (0.342)   | 0.000              |
| TFBS                          | 0.132      | 0.364 (0.208)  | 2.751 (1.569)   | 0.259              |
| TFBS + 500bp                  | 0.343      | 0.487 (0.155)  | 1.418 (0.451)   | 0.366              |
| Transcribed                   | 0.345      | 0.302 (0.142)  | 0.874 (0.411)   | 0.758              |
| Transcribed + 500bp           | 0.763      | 0.677 (0.113)  | 0.887 (0.148)   | 0.449              |
| TSS                           | 0.018      | 0.185 (0.078)  | 10.152 (4.286)  | 0.032              |
| TSS + 500bp                   | 0.035      | 0.141 (0.080)  | 4.061 (2.305)   | 0.187              |
| 3-prime UTR                   | 0.011      | 0.055 (0.045)  | 5.018 (4.095)   | 0.323              |
| 3-prime UTR + 500bp           | 0.027      | 0.151 (0.064)  | 5.624 (2.362)   | 0.046              |
| 5-prime UTR                   | 0.005      | -0.003 (0.037) | -0.542 (6.835)  | 0.821              |
| 5-prime UTR + 500bp           | 0.028      | 0.029 (0.055)  | 1.036 (1.990)   | 0.985              |
| Weak Enhancer                 | 0.021      | 0.128 (0.091)  | 6.055 (4.327)   | 0.241              |
| Weak Enhancer + 500bp         | 0.089      | 0.285 (0.112)  | 3.200 (1.254)   | 0.084              |

(g) Coronary artery disease

Supplementary Table 5: Proportion of heritability and enrichment for different functional categories for 17 traits.

| Annotation                    | Prop. SNPs | Prop. $h^2$    | Enrichment      | Enrichment P-value |
|-------------------------------|------------|----------------|-----------------|--------------------|
| Coding                        | 0.015      | 0.026 (0.070)  | 1.784 (4.759)   | 0.869              |
| Coding + 500bp                | 0.065      | 0.104 (0.089)  | 1.614 (1.374)   | 0.652              |
| Conserved                     | 0.026      | 0.347 (0.129)  | 13.300 (4.941)  | 0.009              |
| Conserved + 500bp             | 0.333      | 0.688 (0.177)  | 2.068 (0.534)   | 0.039              |
| CTCF                          | 0.024      | -0.080 (0.121) | -3.350 (5.058)  | 0.378              |
| CTCF + 500bp                  | 0.071      | 0.013 (0.111)  | 0.182 (1.562)   | 0.597              |
| DGF                           | 0.138      | 0.014 (0.328)  | 0.099 (2.385)   | 0.706              |
| DGF + 500bp                   | 0.542      | 1.011 (0.184)  | 1.867 (0.340)   | 0.012              |
| DHS peaks                     | 0.112      | 0.130 (0.303)  | 1.167 (2.708)   | 0.951              |
| DHS                           | 0.168      | 0.385 (0.326)  | 2.296 (1.943)   | 0.499              |
| DHS + 500bp                   | 0.499      | 1.009 (0.172)  | 2.022 (0.346)   | 0.006              |
| FANTOM5 Enhancer              | 0.004      | -0.004 (0.055) | -0.922 (12.792) | 0.880              |
| FANTOM5 Enhancer + 500bp      | 0.019      | -0.050 (0.070) | -2.628 (3.652)  | 0.322              |
| Enhancer                      | 0.063      | 0.258 (0.146)  | 4.068 (2.303)   | 0.173              |
| Enhancer + 500bp              | 0.154      | 0.503 (0.141)  | 3.270 (0.914)   | 0.016              |
| Fetal DHS                     | 0.085      | 0.208 (0.269)  | 2.458 (3.180)   | 0.645              |
| Fetal DHS + 500bp             | 0.285      | 0.577 (0.179)  | 2.025 (0.628)   | 0.121              |
| H3K27ac <sup>18</sup>         | 0.391      | 0.581 (0.110)  | 1.485 (0.281)   | 0.090              |
| H3K27ac <sup>18</sup> + 500bp | 0.423      | 0.748 (0.107)  | 1.771 (0.253)   | 0.003              |
| H3K27ac <sup>17</sup>         | 0.269      | 0.699 (0.190)  | 2.593 (0.704)   | 0.023              |
| H3K27ac <sup>17</sup> + 500bp | 0.336      | 0.760 (0.135)  | 2.263 (0.403)   | 0.001              |
| H3K4me1 peaks                 | 0.171      | 0.586 (0.239)  | 3.419 (1.394)   | 0.080              |
| H3K4me1                       | 0.427      | 0.799 (0.231)  | 1.873 (0.541)   | 0.091              |
| H3K4me1 + 500bp               | 0.609      | 1.006 (0.102)  | 1.652 (0.168)   | 0.000              |
| H3K4me3 peaks                 | 0.042      | 0.186 (0.152)  | 4.460 (3.640)   | 0.333              |
| H3K4me3                       | 0.133      | 0.517 (0.160)  | 3.879 (1.197)   | 0.014              |
| H3K4me3 + 500bp               | 0.255      | 0.651 (0.142)  | 2.549 (0.556)   | 0.004              |
| H3K9ac peaks                  | 0.039      | 0.043 (0.174)  | 1.120 (4.482)   | 0.979              |
| H3K9ac                        | 0.126      | 0.632 (0.185)  | 5.012 (1.465)   | 0.004              |
| H3K9ac + 500bp                | 0.231      | 0.746 (0.147)  | 3.237 (0.639)   | 0.000              |
| Intron                        | 0.387      | 0.526 (0.071)  | 1.357 (0.183)   | 0.048              |
| Intron + 500bp                | 0.397      | 0.510 (0.055)  | 1.283 (0.139)   | 0.043              |
| PromoterFlanking              | 0.008      | 0.064 (0.078)  | 7.616 (9.309)   | 0.474              |
| PromoterFlanking + 500bp      | 0.033      | 0.122 (0.110)  | 3.631 (3.289)   | 0.421              |
| Promoter                      | 0.031      | 0.098 (0.086)  | 3.132 (2.773)   | 0.445              |
| Promoter + 500bp              | 0.039      | 0.059 (0.054)  | 1.522 (1.409)   | 0.710              |
| Repressed                     | 0.461      | 0.122 (0.229)  | 0.264 (0.497)   | 0.136              |
| Repressed + 500bp             | 0.719      | 0.380 (0.084)  | 0.528 (0.116)   | 0.000              |
| Super Enhancer                | 0.168      | 0.307 (0.068)  | 1.824 (0.406)   | 0.047              |
| Super Enhancer + 500bp        | 0.172      | 0.317 (0.062)  | 1.850 (0.363)   | 0.025              |
| TFBS                          | 0.132      | 0.242 (0.249)  | 1.827 (1.878)   | 0.658              |
| TFBS + 500bp                  | 0.343      | 0.628 (0.184)  | 1.829 (0.534)   | 0.132              |
| Transcribed                   | 0.345      | 0.695 (0.218)  | 2.013 (0.631)   | 0.099              |
| Transcribed + 500bp           | 0.763      | 0.557 (0.124)  | 0.730 (0.162)   | 0.095              |
| TSS                           | 0.018      | 0.140 (0.088)  | 7.668 (4.847)   | 0.159              |
| TSS + 500bp                   | 0.035      | 0.044 (0.090)  | 1.276 (2.587)   | 0.915              |
| 3-prime UTR                   | 0.011      | -0.021 (0.048) | -1.927 (4.353)  | 0.500              |
| 3-prime UTR + 500bp           | 0.027      | 0.020 (0.057)  | 0.751 (2.108)   | 0.906              |
| 5-prime UTR                   | 0.005      | 0.077 (0.116)  | 14.223 (21.357) | 0.536              |
| 5-prime UTR + 500bp           | 0.028      | 0.097 (0.071)  | 3.480 (2.569)   | 0.323              |
| Weak Enhancer                 | 0.021      | 0.143 (0.140)  | 6.792 (6.656)   | 0.385              |
| Weak Enhancer + 500bp         | 0.089      | 0.280 (0.126)  | 3.152 (1.422)   | 0.141              |

(h) Type 2 Diabetes

Supplementary Table 5: Proportion of heritability and enrichment for different functional categories for 17 traits.

| Annotation                    | Prop. SNPs | Prop. $h^2$    | Enrichment      | Enrichment P-value |
|-------------------------------|------------|----------------|-----------------|--------------------|
| Coding                        | 0.015      | -0.014 (0.085) | -0.960 (5.796)  | 0.736              |
| Coding + 500bp                | 0.065      | 0.206 (0.087)  | 3.184 (1.345)   | 0.108              |
| Conserved                     | 0.026      | 0.286 (0.119)  | 10.982 (4.579)  | 0.025              |
| Conserved + 500bp             | 0.333      | 0.874 (0.153)  | 2.629 (0.461)   | 0.001              |
| CTCF                          | 0.024      | -0.044 (0.117) | -1.842 (4.900)  | 0.561              |
| CTCF + 500bp                  | 0.071      | -0.036 (0.132) | -0.501 (1.860)  | 0.421              |
| DGF                           | 0.138      | 0.394 (0.297)  | 2.861 (2.157)   | 0.380              |
| DGF + 500bp                   | 0.542      | 0.723 (0.173)  | 1.335 (0.320)   | 0.295              |
| DHS peaks                     | 0.112      | 0.170 (0.291)  | 1.523 (2.602)   | 0.841              |
| DHS                           | 0.168      | 0.711 (0.307)  | 4.238 (1.830)   | 0.075              |
| DHS + 500bp                   | 0.499      | 0.564 (0.204)  | 1.132 (0.409)   | 0.747              |
| FANTOM5 Enhancer              | 0.004      | -0.001 (0.057) | -0.176 (13.241) | 0.929              |
| FANTOM5 Enhancer + 500bp      | 0.019      | 0.057 (0.072)  | 2.975 (3.766)   | 0.601              |
| Enhancer                      | 0.063      | 0.358 (0.172)  | 5.658 (2.710)   | 0.085              |
| Enhancer + 500bp              | 0.154      | 0.519 (0.139)  | 3.370 (0.901)   | 0.008              |
| Fetal DHS                     | 0.085      | 0.375 (0.215)  | 4.424 (2.531)   | 0.173              |
| Fetal DHS + 500bp             | 0.285      | 0.763 (0.206)  | 2.677 (0.723)   | 0.020              |
| H3K27ac <sup>18</sup>         | 0.391      | 0.679 (0.097)  | 1.737 (0.247)   | 0.005              |
| H3K27ac <sup>18</sup> + 500bp | 0.423      | 0.734 (0.096)  | 1.737 (0.226)   | 0.003              |
| H3K27ac <sup>17</sup>         | 0.269      | 0.734 (0.175)  | 2.723 (0.649)   | 0.011              |
| H3K27ac <sup>17</sup> + 500bp | 0.336      | 0.952 (0.159)  | 2.833 (0.472)   | 0.000              |
| H3K4me1 peaks                 | 0.171      | 0.865 (0.281)  | 5.049 (1.638)   | 0.007              |
| H3K4me1                       | 0.427      | 0.743 (0.180)  | 1.742 (0.422)   | 0.081              |
| H3K4me1 + 500bp               | 0.609      | 1.017 (0.118)  | 1.670 (0.193)   | 0.001              |
| H3K4me3 peaks                 | 0.042      | -0.014 (0.157) | -0.323 (3.767)  | 0.725              |
| H3K4me3                       | 0.133      | 0.583 (0.154)  | 4.372 (1.157)   | 0.002              |
| H3K4me3 + 500bp               | 0.255      | 0.638 (0.141)  | 2.496 (0.553)   | 0.007              |
| H3K9ac peaks                  | 0.039      | 0.297 (0.153)  | 7.658 (3.955)   | 0.092              |
| H3K9ac                        | 0.126      | 0.753 (0.172)  | 5.973 (1.366)   | 0.000              |
| H3K9ac + 500bp                | 0.231      | 0.542 (0.150)  | 2.350 (0.652)   | 0.052              |
| Intron                        | 0.387      | 0.596 (0.087)  | 1.539 (0.224)   | 0.023              |
| Intron + 500bp                | 0.397      | 0.593 (0.064)  | 1.492 (0.161)   | 0.001              |
| PromoterFlanking              | 0.008      | -0.075 (0.071) | -8.868 (8.467)  | 0.236              |
| PromoterFlanking + 500bp      | 0.033      | 0.126 (0.084)  | 3.750 (2.508)   | 0.267              |
| Promoter                      | 0.031      | 0.087 (0.080)  | 2.795 (2.563)   | 0.489              |
| Promoter + 500bp              | 0.039      | 0.163 (0.066)  | 4.214 (1.720)   | 0.071              |
| Repressed                     | 0.461      | 0.326 (0.195)  | 0.707 (0.423)   | 0.491              |
| Repressed + 500bp             | 0.719      | 0.308 (0.096)  | 0.429 (0.134)   | 0.000              |
| Super Enhancer                | 0.168      | 0.311 (0.064)  | 1.848 (0.382)   | 0.034              |
| Super Enhancer + 500bp        | 0.172      | 0.436 (0.064)  | 2.541 (0.372)   | 0.000              |
| TFBS                          | 0.132      | 0.420 (0.229)  | 3.173 (1.727)   | 0.209              |
| TFBS + 500bp                  | 0.343      | 0.497 (0.179)  | 1.446 (0.521)   | 0.396              |
| Transcribed                   | 0.345      | 0.502 (0.187)  | 1.454 (0.541)   | 0.398              |
| Transcribed + 500bp           | 0.763      | 0.511 (0.139)  | 0.670 (0.182)   | 0.060              |
| TSS                           | 0.018      | -0.066 (0.085) | -3.643 (4.647)  | 0.304              |
| TSS + 500bp                   | 0.035      | 0.113 (0.093)  | 3.243 (2.665)   | 0.403              |
| 3-prime UTR                   | 0.011      | -0.019 (0.053) | -1.722 (4.832)  | 0.576              |
| 3-prime UTR + 500bp           | 0.027      | -0.010 (0.062) | -0.367 (2.316)  | 0.553              |
| 5-prime UTR                   | 0.005      | 0.041 (0.084)  | 7.573 (15.429)  | 0.668              |
| 5-prime UTR + 500bp           | 0.028      | 0.120 (0.067)  | 4.312 (2.396)   | 0.156              |
| Weak Enhancer                 | 0.021      | 0.210 (0.117)  | 9.946 (5.569)   | 0.108              |
| Weak Enhancer + 500bp         | 0.089      | 0.313 (0.131)  | 3.523 (1.472)   | 0.085              |

(i) Fasting Glucose

Supplementary Table 5: Proportion of heritability and enrichment for different functional categories for 17 traits.

| Annotation                    | Prop. SNPs | Prop. $h^2$    | Enrichment     | Enrichment P-value |
|-------------------------------|------------|----------------|----------------|--------------------|
| Coding                        | 0.015      | 0.085 (0.022)  | 5.823 (1.494)  | 0.002              |
| Coding + 500bp                | 0.065      | 0.127 (0.026)  | 1.970 (0.397)  | 0.015              |
| Conserved                     | 0.026      | 0.287 (0.044)  | 11.028 (1.682) | 0.000              |
| Conserved + 500bp             | 0.333      | 0.658 (0.047)  | 1.979 (0.140)  | 0.000              |
| CTCF                          | 0.024      | -0.041 (0.032) | -1.716 (1.357) | 0.047              |
| CTCF + 500bp                  | 0.071      | 0.079 (0.033)  | 1.118 (0.462)  | 0.799              |
| DGF                           | 0.138      | 0.168 (0.083)  | 1.222 (0.602)  | 0.713              |
| DGF + 500bp                   | 0.542      | 0.667 (0.057)  | 1.232 (0.106)  | 0.034              |
| DHS peaks                     | 0.112      | 0.066 (0.069)  | 0.587 (0.622)  | 0.505              |
| DHS                           | 0.168      | 0.175 (0.082)  | 1.045 (0.489)  | 0.927              |
| DHS + 500bp                   | 0.499      | 0.687 (0.058)  | 1.377 (0.115)  | 0.001              |
| FANTOM5 Enhancer              | 0.004      | -0.024 (0.015) | -5.438 (3.565) | 0.071              |
| FANTOM5 Enhancer + 500bp      | 0.019      | -0.001 (0.020) | -0.068 (1.037) | 0.304              |
| Enhancer                      | 0.063      | 0.029 (0.043)  | 0.465 (0.678)  | 0.433              |
| Enhancer + 500bp              | 0.154      | 0.238 (0.040)  | 1.544 (0.262)  | 0.039              |
| Fetal DHS                     | 0.085      | 0.216 (0.070)  | 2.547 (0.822)  | 0.065              |
| Fetal DHS + 500bp             | 0.285      | 0.486 (0.060)  | 1.705 (0.210)  | 0.001              |
| H3K27ac <sup>18</sup>         | 0.391      | 0.503 (0.027)  | 1.287 (0.070)  | 0.000              |
| H3K27ac <sup>18</sup> + 500bp | 0.423      | 0.552 (0.036)  | 1.306 (0.086)  | 0.001              |
| H3K27ac <sup>17</sup>         | 0.269      | 0.372 (0.045)  | 1.381 (0.169)  | 0.027              |
| H3K27ac <sup>17</sup> + 500bp | 0.336      | 0.544 (0.042)  | 1.618 (0.125)  | 0.000              |
| H3K4me1 peaks                 | 0.171      | 0.412 (0.072)  | 2.407 (0.423)  | 0.001              |
| H3K4me1                       | 0.427      | 0.646 (0.052)  | 1.514 (0.123)  | 0.000              |
| H3K4me1 + 500bp               | 0.609      | 0.794 (0.034)  | 1.304 (0.056)  | 0.000              |
| H3K4me3 peaks                 | 0.042      | 0.188 (0.048)  | 4.511 (1.151)  | 0.002              |
| H3K4me3                       | 0.133      | 0.292 (0.046)  | 2.192 (0.341)  | 0.001              |
| H3K4me3 + 500bp               | 0.255      | 0.353 (0.040)  | 1.383 (0.155)  | 0.015              |
| H3K9ac peaks                  | 0.039      | 0.239 (0.042)  | 6.163 (1.090)  | 0.000              |
| H3K9ac                        | 0.126      | 0.287 (0.051)  | 2.278 (0.403)  | 0.002              |
| H3K9ac + 500bp                | 0.231      | 0.457 (0.037)  | 1.981 (0.161)  | 0.000              |
| Intron                        | 0.387      | 0.513 (0.024)  | 1.323 (0.063)  | 0.000              |
| Intron + 500bp                | 0.397      | 0.524 (0.018)  | 1.321 (0.046)  | 0.000              |
| PromoterFlanking              | 0.008      | 0.029 (0.021)  | 3.397 (2.541)  | 0.348              |
| PromoterFlanking + 500bp      | 0.033      | 0.070 (0.025)  | 2.099 (0.756)  | 0.141              |
| Promoter                      | 0.031      | 0.068 (0.027)  | 2.192 (0.882)  | 0.179              |
| Promoter + 500bp              | 0.039      | 0.037 (0.020)  | 0.952 (0.529)  | 0.928              |
| Repressed                     | 0.461      | 0.450 (0.070)  | 0.975 (0.151)  | 0.867              |
| Repressed + 500bp             | 0.719      | 0.627 (0.027)  | 0.873 (0.038)  | 0.001              |
| Super Enhancer                | 0.168      | 0.247 (0.022)  | 1.467 (0.130)  | 0.001              |
| Super Enhancer + 500bp        | 0.172      | 0.253 (0.019)  | 1.475 (0.114)  | 0.000              |
| TFBS                          | 0.132      | 0.217 (0.059)  | 1.639 (0.448)  | 0.154              |
| TFBS + 500bp                  | 0.343      | 0.372 (0.059)  | 1.083 (0.171)  | 0.629              |
| Transcribed                   | 0.345      | 0.391 (0.062)  | 1.133 (0.179)  | 0.455              |
| Transcribed + 500bp           | 0.763      | 0.812 (0.035)  | 1.064 (0.046)  | 0.163              |
| TSS                           | 0.018      | 0.053 (0.027)  | 2.918 (1.473)  | 0.194              |
| TSS + 500bp                   | 0.035      | 0.107 (0.023)  | 3.081 (0.666)  | 0.002              |
| 3-prime UTR                   | 0.011      | 0.062 (0.019)  | 5.583 (1.699)  | 0.008              |
| 3-prime UTR + 500bp           | 0.027      | 0.085 (0.020)  | 3.140 (0.756)  | 0.006              |
| 5-prime UTR                   | 0.005      | 0.020 (0.012)  | 3.656 (2.212)  | 0.233              |
| 5-prime UTR + 500bp           | 0.028      | 0.055 (0.020)  | 1.975 (0.711)  | 0.173              |
| Weak Enhancer                 | 0.021      | 0.016 (0.032)  | 0.759 (1.538)  | 0.876              |
| Weak Enhancer + 500bp         | 0.089      | 0.146 (0.040)  | 1.643 (0.448)  | 0.156              |

(j) Schizophrenia

Supplementary Table 5: Proportion of heritability and enrichment for different functional categories for 17 traits.

| Annotation                    | Prop. SNPs | Prop. $h^2$    | Enrichment     | Enrichment P-value |
|-------------------------------|------------|----------------|----------------|--------------------|
| Coding                        | 0.015      | 0.186 (0.090)  | 12.671 (6.108) | 0.053              |
| Coding + 500bp                | 0.065      | 0.200 (0.086)  | 3.098 (1.339)  | 0.116              |
| Conserved                     | 0.026      | 0.302 (0.114)  | 11.588 (4.381) | 0.013              |
| Conserved + 500bp             | 0.333      | 0.527 (0.115)  | 1.586 (0.346)  | 0.095              |
| CTCF                          | 0.024      | 0.013 (0.112)  | 0.556 (4.686)  | 0.925              |
| CTCF + 500bp                  | 0.071      | 0.138 (0.103)  | 1.944 (1.454)  | 0.519              |
| DGF                           | 0.138      | 0.723 (0.240)  | 5.251 (1.746)  | 0.013              |
| DGF + 500bp                   | 0.542      | 0.854 (0.170)  | 1.578 (0.315)  | 0.076              |
| DHS peaks                     | 0.112      | 0.447 (0.214)  | 4.001 (1.911)  | 0.115              |
| DHS                           | 0.168      | 0.670 (0.254)  | 3.993 (1.512)  | 0.044              |
| DHS + 500bp                   | 0.499      | 0.735 (0.168)  | 1.474 (0.337)  | 0.181              |
| FANTOM5 Enhancer              | 0.004      | 0.013 (0.047)  | 2.987 (10.733) | 0.853              |
| FANTOM5 Enhancer + 500bp      | 0.019      | -0.106 (0.053) | -5.564 (2.797) | 0.015              |
| Enhancer                      | 0.063      | 0.317 (0.130)  | 4.999 (2.061)  | 0.055              |
| Enhancer + 500bp              | 0.154      | 0.299 (0.122)  | 1.940 (0.793)  | 0.242              |
| Fetal DHS                     | 0.085      | 0.264 (0.188)  | 3.120 (2.221)  | 0.339              |
| Fetal DHS + 500bp             | 0.285      | 0.555 (0.170)  | 1.947 (0.598)  | 0.123              |
| H3K27ac <sup>18</sup>         | 0.391      | 0.456 (0.089)  | 1.166 (0.228)  | 0.470              |
| H3K27ac <sup>18</sup> + 500bp | 0.423      | 0.564 (0.086)  | 1.335 (0.203)  | 0.097              |
| H3K27ac <sup>17</sup>         | 0.269      | 0.574 (0.135)  | 2.132 (0.502)  | 0.031              |
| H3K27ac <sup>17</sup> + 500bp | 0.336      | 0.727 (0.116)  | 2.162 (0.345)  | 0.001              |
| H3K4me1 peaks                 | 0.171      | 0.719 (0.217)  | 4.196 (1.268)  | 0.012              |
| H3K4me1                       | 0.427      | 0.970 (0.165)  | 2.274 (0.386)  | 0.001              |
| H3K4me1 + 500bp               | 0.609      | 0.754 (0.098)  | 1.238 (0.161)  | 0.161              |
| H3K4me3 peaks                 | 0.042      | 0.038 (0.124)  | 0.905 (2.964)  | 0.974              |
| H3K4me3                       | 0.133      | 0.573 (0.147)  | 4.295 (1.102)  | 0.002              |
| H3K4me3 + 500bp               | 0.255      | 0.220 (0.121)  | 0.861 (0.475)  | 0.769              |
| H3K9ac peaks                  | 0.039      | 0.160 (0.125)  | 4.124 (3.221)  | 0.330              |
| H3K9ac                        | 0.126      | 0.450 (0.152)  | 3.572 (1.208)  | 0.032              |
| H3K9ac + 500bp                | 0.231      | 0.502 (0.117)  | 2.176 (0.509)  | 0.025              |
| Intron                        | 0.387      | 0.509 (0.091)  | 1.313 (0.234)  | 0.176              |
| Intron + 500bp                | 0.397      | 0.608 (0.066)  | 1.531 (0.165)  | 0.000              |
| PromoterFlanking              | 0.008      | 0.051 (0.063)  | 6.090 (7.510)  | 0.498              |
| PromoterFlanking + 500bp      | 0.033      | 0.081 (0.086)  | 2.429 (2.555)  | 0.573              |
| Promoter                      | 0.031      | 0.140 (0.084)  | 4.500 (2.703)  | 0.199              |
| Promoter + 500bp              | 0.039      | 0.128 (0.064)  | 3.317 (1.664)  | 0.172              |
| Repressed                     | 0.461      | 0.402 (0.185)  | 0.871 (0.400)  | 0.746              |
| Repressed + 500bp             | 0.719      | 0.460 (0.068)  | 0.640 (0.095)  | 0.000              |
| Super Enhancer                | 0.168      | 0.288 (0.047)  | 1.712 (0.278)  | 0.014              |
| Super Enhancer + 500bp        | 0.172      | 0.252 (0.043)  | 1.469 (0.251)  | 0.072              |
| TFBS                          | 0.132      | 0.459 (0.219)  | 3.462 (1.651)  | 0.142              |
| TFBS + 500bp                  | 0.343      | 0.507 (0.153)  | 1.477 (0.446)  | 0.292              |
| Transcribed                   | 0.345      | 0.311 (0.179)  | 0.900 (0.518)  | 0.848              |
| Transcribed + 500bp           | 0.763      | 0.773 (0.107)  | 1.013 (0.141)  | 0.926              |
| TSS                           | 0.018      | 0.081 (0.070)  | 4.435 (3.867)  | 0.372              |
| TSS + 500bp                   | 0.035      | 0.244 (0.075)  | 7.016 (2.141)  | 0.005              |
| 3-prime UTR                   | 0.011      | 0.094 (0.061)  | 8.508 (5.543)  | 0.174              |
| 3-prime UTR + 500bp           | 0.027      | 0.072 (0.052)  | 2.664 (1.936)  | 0.390              |
| 5-prime UTR                   | 0.005      | 0.122 (0.052)  | 22.400 (9.544) | 0.021              |
| 5-prime UTR + 500bp           | 0.028      | 0.129 (0.052)  | 4.656 (1.860)  | 0.047              |
| Weak Enhancer                 | 0.021      | 0.168 (0.103)  | 7.988 (4.874)  | 0.162              |
| Weak Enhancer + 500bp         | 0.089      | 0.217 (0.099)  | 2.435 (1.110)  | 0.202              |

(k) Bipolar disorder

Supplementary Table 5: Proportion of heritability and enrichment for different functional categories for 17 traits.



| Annotation                    | Prop. SNPs | Prop. $h^2$    | Enrichment       | Enrichment P-value |
|-------------------------------|------------|----------------|------------------|--------------------|
| Coding                        | 0.015      | 0.017 (0.068)  | 1.145 (4.643)    | 0.975              |
| Coding + 500bp                | 0.065      | 0.140 (0.060)  | 2.169 (0.923)    | 0.204              |
| Conserved                     | 0.026      | 0.186 (0.110)  | 7.128 (4.207)    | 0.144              |
| Conserved + 500bp             | 0.333      | 0.635 (0.123)  | 1.910 (0.370)    | 0.016              |
| CTCF                          | 0.024      | 0.019 (0.098)  | 0.802 (4.117)    | 0.962              |
| CTCF + 500bp                  | 0.071      | 0.012 (0.107)  | 0.162 (1.502)    | 0.575              |
| DGF                           | 0.138      | 0.257 (0.241)  | 1.865 (1.751)    | 0.620              |
| DGF + 500bp                   | 0.542      | 0.573 (0.145)  | 1.058 (0.267)    | 0.828              |
| DHS peaks                     | 0.112      | 0.041 (0.212)  | 0.367 (1.898)    | 0.739              |
| DHS                           | 0.168      | -0.021 (0.272) | -0.126 (1.624)   | 0.487              |
| DHS + 500bp                   | 0.499      | 0.780 (0.172)  | 1.564 (0.346)    | 0.115              |
| FANTOM5 Enhancer              | 0.004      | -0.118 (0.044) | -27.161 (10.077) | 0.004              |
| FANTOM5 Enhancer + 500bp      | 0.019      | 0.037 (0.049)  | 1.915 (2.581)    | 0.725              |
| Enhancer                      | 0.063      | 0.117 (0.118)  | 1.852 (1.861)    | 0.647              |
| Enhancer + 500bp              | 0.154      | 0.237 (0.113)  | 1.537 (0.732)    | 0.469              |
| Fetal DHS                     | 0.085      | 0.222 (0.199)  | 2.618 (2.353)    | 0.493              |
| Fetal DHS + 500bp             | 0.285      | 0.458 (0.170)  | 1.606 (0.595)    | 0.322              |
| H3K27ac <sup>18</sup>         | 0.391      | 0.528 (0.076)  | 1.350 (0.195)    | 0.074              |
| H3K27ac <sup>18</sup> + 500bp | 0.423      | 0.435 (0.089)  | 1.030 (0.212)    | 0.888              |
| H3K27ac <sup>17</sup>         | 0.269      | 0.362 (0.136)  | 1.343 (0.503)    | 0.498              |
| H3K27ac <sup>17</sup> + 500bp | 0.336      | 0.467 (0.116)  | 1.391 (0.345)    | 0.256              |
| H3K4me1 peaks                 | 0.171      | 0.481 (0.215)  | 2.806 (1.254)    | 0.148              |
| H3K4me1                       | 0.427      | 0.867 (0.153)  | 2.033 (0.358)    | 0.005              |
| H3K4me1 + 500bp               | 0.609      | 0.798 (0.107)  | 1.309 (0.175)    | 0.090              |
| H3K4me3 peaks                 | 0.042      | 0.101 (0.116)  | 2.424 (2.771)    | 0.607              |
| H3K4me3                       | 0.133      | 0.205 (0.123)  | 1.538 (0.925)    | 0.561              |
| H3K4me3 + 500bp               | 0.255      | 0.277 (0.122)  | 1.086 (0.477)    | 0.857              |
| H3K9ac peaks                  | 0.039      | -0.025 (0.137) | -0.656 (3.539)   | 0.641              |
| H3K9ac                        | 0.126      | 0.244 (0.129)  | 1.935 (1.021)    | 0.356              |
| H3K9ac + 500bp                | 0.231      | 0.178 (0.122)  | 0.771 (0.527)    | 0.662              |
| Intron                        | 0.387      | 0.417 (0.066)  | 1.076 (0.170)    | 0.653              |
| Intron + 500bp                | 0.397      | 0.429 (0.055)  | 1.081 (0.138)    | 0.557              |
| PromoterFlanking              | 0.008      | 0.041 (0.060)  | 4.904 (7.120)    | 0.580              |
| PromoterFlanking + 500bp      | 0.033      | 0.114 (0.077)  | 3.412 (2.301)    | 0.294              |
| Promoter                      | 0.031      | 0.022 (0.070)  | 0.692 (2.238)    | 0.891              |
| Promoter + 500bp              | 0.039      | -0.027 (0.043) | -0.694 (1.125)   | 0.134              |
| Repressed                     | 0.461      | 0.402 (0.179)  | 0.871 (0.389)    | 0.740              |
| Repressed + 500bp             | 0.719      | 0.724 (0.063)  | 1.006 (0.088)    | 0.943              |
| Super Enhancer                | 0.168      | 0.171 (0.047)  | 1.017 (0.280)    | 0.950              |
| Super Enhancer + 500bp        | 0.172      | 0.238 (0.045)  | 1.387 (0.260)    | 0.140              |
| TFBS                          | 0.132      | 0.309 (0.179)  | 2.330 (1.348)    | 0.327              |
| TFBS + 500bp                  | 0.343      | 0.386 (0.159)  | 1.125 (0.462)    | 0.789              |
| Transcribed                   | 0.345      | 0.397 (0.158)  | 1.150 (0.457)    | 0.741              |
| Transcribed + 500bp           | 0.763      | 0.685 (0.113)  | 0.897 (0.148)    | 0.489              |
| TSS                           | 0.018      | 0.078 (0.075)  | 4.287 (4.092)    | 0.423              |
| TSS + 500bp                   | 0.035      | 0.081 (0.062)  | 2.336 (1.787)    | 0.455              |
| 3-prime UTR                   | 0.011      | 0.005 (0.040)  | 0.477 (3.601)    | 0.884              |
| 3-prime UTR + 500bp           | 0.027      | 0.052 (0.046)  | 1.935 (1.725)    | 0.588              |
| 5-prime UTR                   | 0.005      | 0.001 (0.039)  | 0.261 (7.130)    | 0.917              |
| 5-prime UTR + 500bp           | 0.028      | 0.029 (0.053)  | 1.041 (1.898)    | 0.983              |
| Weak Enhancer                 | 0.021      | 0.126 (0.086)  | 5.969 (4.064)    | 0.223              |
| Weak Enhancer + 500bp         | 0.089      | 0.139 (0.095)  | 1.564 (1.066)    | 0.600              |

(l) Anorexia

Supplementary Table 5: Proportion of heritability and enrichment for different functional categories for 17 traits.

| Annotation                    | Prop. SNPs | Prop. $h^2$    | Enrichment     | Enrichment P-value |
|-------------------------------|------------|----------------|----------------|--------------------|
| Coding                        | 0.015      | 0.103 (0.045)  | 7.009 (3.057)  | 0.052              |
| Coding + 500bp                | 0.065      | 0.154 (0.053)  | 2.383 (0.822)  | 0.093              |
| Conserved                     | 0.026      | 0.398 (0.075)  | 15.273 (2.865) | 0.000              |
| Conserved + 500bp             | 0.333      | 0.785 (0.092)  | 2.362 (0.276)  | 0.000              |
| CTCF                          | 0.024      | -0.040 (0.062) | -1.658 (2.619) | 0.308              |
| CTCF + 500bp                  | 0.071      | 0.063 (0.076)  | 0.888 (1.070)  | 0.916              |
| DGF                           | 0.138      | 0.065 (0.164)  | 0.474 (1.192)  | 0.660              |
| DGF + 500bp                   | 0.542      | 0.644 (0.112)  | 1.189 (0.206)  | 0.365              |
| DHS peaks                     | 0.112      | 0.346 (0.156)  | 3.093 (1.393)  | 0.138              |
| DHS                           | 0.168      | 0.333 (0.184)  | 1.985 (1.098)  | 0.373              |
| DHS + 500bp                   | 0.499      | 0.995 (0.134)  | 1.994 (0.270)  | 0.000              |
| FANTOM5 Enhancer              | 0.004      | 0.002 (0.030)  | 0.406 (6.977)  | 0.932              |
| FANTOM5 Enhancer + 500bp      | 0.019      | 0.074 (0.042)  | 3.860 (2.193)  | 0.194              |
| Enhancer                      | 0.063      | 0.307 (0.085)  | 4.851 (1.340)  | 0.004              |
| Enhancer + 500bp              | 0.154      | 0.390 (0.088)  | 2.537 (0.569)  | 0.008              |
| Fetal DHS                     | 0.085      | 0.355 (0.146)  | 4.190 (1.718)  | 0.066              |
| Fetal DHS + 500bp             | 0.285      | 0.870 (0.129)  | 3.052 (0.453)  | 0.000              |
| H3K27ac <sup>18</sup>         | 0.391      | 0.530 (0.060)  | 1.354 (0.153)  | 0.028              |
| H3K27ac <sup>18</sup> + 500bp | 0.423      | 0.468 (0.077)  | 1.107 (0.183)  | 0.564              |
| H3K27ac <sup>17</sup>         | 0.269      | 0.312 (0.100)  | 1.157 (0.369)  | 0.671              |
| H3K27ac <sup>17</sup> + 500bp | 0.336      | 0.480 (0.085)  | 1.429 (0.253)  | 0.092              |
| H3K4me1 peaks                 | 0.171      | 0.602 (0.141)  | 3.511 (0.822)  | 0.003              |
| H3K4me1                       | 0.427      | 0.678 (0.146)  | 1.589 (0.342)  | 0.092              |
| H3K4me1 + 500bp               | 0.609      | 0.781 (0.076)  | 1.282 (0.125)  | 0.032              |
| H3K4me3 peaks                 | 0.042      | 0.147 (0.095)  | 3.510 (2.274)  | 0.265              |
| H3K4me3                       | 0.133      | 0.358 (0.093)  | 2.685 (0.699)  | 0.016              |
| H3K4me3 + 500bp               | 0.255      | 0.401 (0.087)  | 1.569 (0.342)  | 0.102              |
| H3K9ac peaks                  | 0.039      | 0.299 (0.084)  | 7.717 (2.157)  | 0.001              |
| H3K9ac                        | 0.126      | 0.442 (0.088)  | 3.509 (0.696)  | 0.000              |
| H3K9ac + 500bp                | 0.231      | 0.500 (0.076)  | 2.170 (0.330)  | 0.000              |
| Intron                        | 0.387      | 0.471 (0.047)  | 1.215 (0.122)  | 0.073              |
| Intron + 500bp                | 0.397      | 0.464 (0.037)  | 1.169 (0.094)  | 0.066              |
| PromoterFlanking              | 0.008      | 0.001 (0.045)  | 0.073 (5.297)  | 0.861              |
| PromoterFlanking + 500bp      | 0.033      | 0.055 (0.050)  | 1.636 (1.482)  | 0.669              |
| Promoter                      | 0.031      | 0.030 (0.047)  | 0.973 (1.521)  | 0.986              |
| Promoter + 500bp              | 0.039      | 0.041 (0.035)  | 1.070 (0.909)  | 0.939              |
| Repressed                     | 0.461      | 0.511 (0.141)  | 1.107 (0.306)  | 0.726              |
| Repressed + 500bp             | 0.719      | 0.498 (0.051)  | 0.693 (0.071)  | 0.000              |
| Super Enhancer                | 0.168      | 0.188 (0.035)  | 1.113 (0.206)  | 0.582              |
| Super Enhancer + 500bp        | 0.172      | 0.216 (0.033)  | 1.259 (0.191)  | 0.183              |
| TFBS                          | 0.132      | 0.453 (0.135)  | 3.420 (1.016)  | 0.017              |
| TFBS + 500bp                  | 0.343      | 0.457 (0.130)  | 1.330 (0.380)  | 0.391              |
| Transcribed                   | 0.345      | 0.205 (0.110)  | 0.594 (0.319)  | 0.211              |
| Transcribed + 500bp           | 0.763      | 0.731 (0.078)  | 0.958 (0.102)  | 0.681              |
| TSS                           | 0.018      | 0.052 (0.048)  | 2.840 (2.659)  | 0.491              |
| TSS + 500bp                   | 0.035      | 0.159 (0.050)  | 4.558 (1.428)  | 0.015              |
| 3-prime UTR                   | 0.011      | 0.038 (0.028)  | 3.478 (2.508)  | 0.329              |
| 3-prime UTR + 500bp           | 0.027      | 0.068 (0.033)  | 2.543 (1.239)  | 0.217              |
| 5-prime UTR                   | 0.005      | 0.056 (0.033)  | 10.371 (6.148) | 0.131              |
| 5-prime UTR + 500bp           | 0.028      | 0.132 (0.040)  | 4.754 (1.439)  | 0.009              |
| Weak Enhancer                 | 0.021      | 0.138 (0.069)  | 6.540 (3.279)  | 0.095              |
| Weak Enhancer + 500bp         | 0.089      | 0.276 (0.072)  | 3.105 (0.804)  | 0.010              |

(m) Years of education

Supplementary Table 5: Proportion of heritability and enrichment for different functional categories for 17 traits.

| Annotation                    | Prop. SNPs | Prop. $h^2$    | Enrichment     | Enrichment P-value |
|-------------------------------|------------|----------------|----------------|--------------------|
| Coding                        | 0.015      | 0.116 (0.077)  | 7.929 (5.251)  | 0.184              |
| Coding + 500bp                | 0.065      | 0.114 (0.076)  | 1.759 (1.184)  | 0.520              |
| Conserved                     | 0.026      | 0.402 (0.126)  | 15.414 (4.816) | 0.003              |
| Conserved + 500bp             | 0.333      | 0.750 (0.133)  | 2.256 (0.401)  | 0.001              |
| CTCF                          | 0.024      | 0.095 (0.128)  | 3.973 (5.379)  | 0.582              |
| CTCF + 500bp                  | 0.071      | 0.215 (0.132)  | 3.029 (1.863)  | 0.283              |
| DGF                           | 0.138      | 0.419 (0.285)  | 3.048 (2.075)  | 0.318              |
| DGF + 500bp                   | 0.542      | 0.896 (0.208)  | 1.655 (0.383)  | 0.102              |
| DHS peaks                     | 0.112      | 0.352 (0.268)  | 3.153 (2.399)  | 0.370              |
| DHS                           | 0.168      | 0.433 (0.287)  | 2.581 (1.710)  | 0.353              |
| DHS + 500bp                   | 0.499      | 0.958 (0.204)  | 1.921 (0.409)  | 0.032              |
| FANTOM5 Enhancer              | 0.004      | 0.006 (0.049)  | 1.319 (11.412) | 0.978              |
| FANTOM5 Enhancer + 500bp      | 0.019      | -0.109 (0.072) | -5.736 (3.797) | 0.064              |
| Enhancer                      | 0.063      | 0.326 (0.151)  | 5.141 (2.385)  | 0.081              |
| Enhancer + 500bp              | 0.154      | 0.387 (0.166)  | 2.513 (1.076)  | 0.170              |
| Fetal DHS                     | 0.085      | 0.538 (0.241)  | 6.346 (2.844)  | 0.060              |
| Fetal DHS + 500bp             | 0.285      | 0.808 (0.181)  | 2.834 (0.634)  | 0.005              |
| H3K27ac <sup>18</sup>         | 0.391      | 0.494 (0.092)  | 1.263 (0.236)  | 0.275              |
| H3K27ac <sup>18</sup> + 500bp | 0.423      | 0.379 (0.131)  | 0.897 (0.310)  | 0.739              |
| H3K27ac <sup>17</sup>         | 0.269      | 0.192 (0.178)  | 0.713 (0.659)  | 0.662              |
| H3K27ac <sup>17</sup> + 500bp | 0.336      | 0.549 (0.152)  | 1.634 (0.453)  | 0.166              |
| H3K4me1 peaks                 | 0.171      | 0.643 (0.256)  | 3.751 (1.494)  | 0.061              |
| H3K4me1                       | 0.427      | 0.946 (0.223)  | 2.218 (0.524)  | 0.020              |
| H3K4me1 + 500bp               | 0.609      | 0.750 (0.135)  | 1.231 (0.222)  | 0.313              |
| H3K4me3 peaks                 | 0.042      | 0.176 (0.181)  | 4.210 (4.327)  | 0.463              |
| H3K4me3                       | 0.133      | 0.275 (0.154)  | 2.066 (1.154)  | 0.363              |
| H3K4me3 + 500bp               | 0.255      | 0.259 (0.149)  | 1.016 (0.582)  | 0.979              |
| H3K9ac peaks                  | 0.039      | 0.233 (0.153)  | 6.009 (3.951)  | 0.209              |
| H3K9ac                        | 0.126      | 0.252 (0.151)  | 2.002 (1.193)  | 0.404              |
| H3K9ac + 500bp                | 0.231      | 0.162 (0.146)  | 0.702 (0.634)  | 0.635              |
| Intron                        | 0.387      | 0.372 (0.081)  | 0.960 (0.210)  | 0.848              |
| Intron + 500bp                | 0.397      | 0.443 (0.068)  | 1.115 (0.171)  | 0.499              |
| PromoterFlanking              | 0.008      | -0.017 (0.061) | -1.974 (7.225) | 0.682              |
| PromoterFlanking + 500bp      | 0.033      | -0.001 (0.093) | -0.032 (2.786) | 0.711              |
| Promoter                      | 0.031      | -0.010 (0.070) | -0.334 (2.252) | 0.557              |
| Promoter + 500bp              | 0.039      | -0.019 (0.055) | -0.483 (1.414) | 0.298              |
| Repressed                     | 0.461      | 0.192 (0.218)  | 0.417 (0.472)  | 0.215              |
| Repressed + 500bp             | 0.719      | 0.504 (0.094)  | 0.701 (0.131)  | 0.022              |
| Super Enhancer                | 0.168      | 0.135 (0.061)  | 0.800 (0.364)  | 0.578              |
| Super Enhancer + 500bp        | 0.172      | 0.071 (0.062)  | 0.414 (0.360)  | 0.093              |
| TFBS                          | 0.132      | 0.743 (0.244)  | 5.613 (1.842)  | 0.016              |
| TFBS + 500bp                  | 0.343      | 0.385 (0.217)  | 1.121 (0.630)  | 0.848              |
| Transcribed                   | 0.345      | 0.276 (0.197)  | 0.798 (0.569)  | 0.723              |
| Transcribed + 500bp           | 0.763      | 0.739 (0.113)  | 0.969 (0.148)  | 0.834              |
| TSS                           | 0.018      | 0.065 (0.087)  | 3.591 (4.775)  | 0.585              |
| TSS + 500bp                   | 0.035      | 0.046 (0.080)  | 1.309 (2.310)  | 0.894              |
| 3-prime UTR                   | 0.011      | 0.009 (0.053)  | 0.839 (4.789)  | 0.973              |
| 3-prime UTR + 500bp           | 0.027      | -0.005 (0.054) | -0.171 (2.017) | 0.562              |
| 5-prime UTR                   | 0.005      | -0.009 (0.046) | -1.695 (8.446) | 0.750              |
| 5-prime UTR + 500bp           | 0.028      | 0.029 (0.059)  | 1.048 (2.110)  | 0.982              |
| Weak Enhancer                 | 0.021      | 0.136 (0.116)  | 6.438 (5.492)  | 0.321              |
| Weak Enhancer + 500bp         | 0.089      | 0.212 (0.128)  | 2.387 (1.444)  | 0.345              |

(n) Ever smoked

Supplementary Table 5: Proportion of heritability and enrichment for different functional categories for 17 traits.

| Annotation                    | Prop. SNPs | Prop. $h^2$    | Enrichment      | Enrichment P-value |
|-------------------------------|------------|----------------|-----------------|--------------------|
| Coding                        | 0.015      | 0.174 (0.091)  | 11.891 (6.175)  | 0.074              |
| Coding + 500bp                | 0.065      | 0.365 (0.082)  | 5.659 (1.264)   | 0.000              |
| Conserved                     | 0.026      | 0.109 (0.115)  | 4.195 (4.394)   | 0.456              |
| Conserved + 500bp             | 0.333      | 0.771 (0.121)  | 2.319 (0.364)   | 0.000              |
| CTCF                          | 0.024      | -0.006 (0.113) | -0.261 (4.762)  | 0.790              |
| CTCF + 500bp                  | 0.071      | -0.152 (0.113) | -2.140 (1.594)  | 0.037              |
| DGF                           | 0.138      | 0.871 (0.252)  | 6.331 (1.829)   | 0.003              |
| DGF + 500bp                   | 0.542      | 1.065 (0.146)  | 1.966 (0.270)   | 0.001              |
| DHS peaks                     | 0.112      | 0.357 (0.255)  | 3.195 (2.283)   | 0.327              |
| DHS                           | 0.168      | 0.523 (0.271)  | 3.121 (1.613)   | 0.178              |
| DHS + 500bp                   | 0.499      | 0.858 (0.145)  | 1.719 (0.292)   | 0.020              |
| FANTOM5 Enhancer              | 0.004      | 0.158 (0.072)  | 36.410 (16.504) | 0.027              |
| FANTOM5 Enhancer + 500bp      | 0.019      | 0.283 (0.084)  | 14.848 (4.406)  | 0.002              |
| Enhancer                      | 0.063      | 0.379 (0.154)  | 5.984 (2.432)   | 0.037              |
| Enhancer + 500bp              | 0.154      | 0.668 (0.120)  | 4.342 (0.778)   | 0.000              |
| Fetal DHS                     | 0.085      | 0.567 (0.198)  | 6.690 (2.334)   | 0.014              |
| Fetal DHS + 500bp             | 0.285      | 0.537 (0.157)  | 1.882 (0.550)   | 0.122              |
| H3K27ac <sup>18</sup>         | 0.391      | 0.980 (0.086)  | 2.506 (0.221)   | 0.000              |
| H3K27ac <sup>18</sup> + 500bp | 0.423      | 0.957 (0.083)  | 2.263 (0.195)   | 0.000              |
| H3K27ac <sup>17</sup>         | 0.269      | 0.951 (0.161)  | 3.530 (0.597)   | 0.000              |
| H3K27ac <sup>17</sup> + 500bp | 0.336      | 0.792 (0.112)  | 2.358 (0.334)   | 0.000              |
| H3K4me1 peaks                 | 0.171      | 0.502 (0.201)  | 2.931 (1.170)   | 0.100              |
| H3K4me1                       | 0.427      | 0.884 (0.190)  | 2.072 (0.446)   | 0.017              |
| H3K4me1 + 500bp               | 0.609      | 1.041 (0.085)  | 1.709 (0.140)   | 0.000              |
| H3K4me3 peaks                 | 0.042      | 0.313 (0.144)  | 7.501 (3.444)   | 0.062              |
| H3K4me3                       | 0.133      | 0.750 (0.149)  | 5.628 (1.119)   | 0.000              |
| H3K4me3 + 500bp               | 0.255      | 0.610 (0.124)  | 2.387 (0.487)   | 0.004              |
| H3K9ac peaks                  | 0.039      | 0.146 (0.138)  | 3.770 (3.571)   | 0.439              |
| H3K9ac                        | 0.126      | 0.335 (0.148)  | 2.655 (1.177)   | 0.155              |
| H3K9ac + 500bp                | 0.231      | 0.434 (0.129)  | 1.883 (0.561)   | 0.115              |
| Intron                        | 0.387      | 0.416 (0.072)  | 1.073 (0.186)   | 0.692              |
| Intron + 500bp                | 0.397      | 0.513 (0.052)  | 1.291 (0.132)   | 0.022              |
| PromoterFlanking              | 0.008      | 0.017 (0.073)  | 2.049 (8.674)   | 0.903              |
| PromoterFlanking + 500bp      | 0.033      | 0.228 (0.096)  | 6.818 (2.856)   | 0.044              |
| Promoter                      | 0.031      | 0.251 (0.079)  | 8.046 (2.519)   | 0.007              |
| Promoter + 500bp              | 0.039      | 0.169 (0.056)  | 4.364 (1.442)   | 0.021              |
| Repressed                     | 0.461      | 0.179 (0.145)  | 0.388 (0.315)   | 0.048              |
| Repressed + 500bp             | 0.719      | 0.260 (0.079)  | 0.362 (0.110)   | 0.000              |
| Super Enhancer                | 0.168      | 0.563 (0.062)  | 3.341 (0.366)   | 0.000              |
| Super Enhancer + 500bp        | 0.172      | 0.615 (0.060)  | 3.582 (0.348)   | 0.000              |
| TFBS                          | 0.132      | 0.791 (0.221)  | 5.970 (1.670)   | 0.002              |
| TFBS + 500bp                  | 0.343      | 0.552 (0.183)  | 1.607 (0.532)   | 0.250              |
| Transcribed                   | 0.345      | 0.302 (0.144)  | 0.875 (0.417)   | 0.764              |
| Transcribed + 500bp           | 0.763      | 0.596 (0.104)  | 0.781 (0.136)   | 0.111              |
| TSS                           | 0.018      | 0.341 (0.090)  | 18.703 (4.964)  | 0.000              |
| TSS + 500bp                   | 0.035      | 0.372 (0.080)  | 10.679 (2.296)  | 0.000              |
| 3-prime UTR                   | 0.011      | 0.073 (0.047)  | 6.588 (4.241)   | 0.190              |
| 3-prime UTR + 500bp           | 0.027      | 0.107 (0.056)  | 3.958 (2.062)   | 0.152              |
| 5-prime UTR                   | 0.005      | 0.019 (0.044)  | 3.562 (8.057)   | 0.749              |
| 5-prime UTR + 500bp           | 0.028      | 0.150 (0.063)  | 5.381 (2.249)   | 0.053              |
| Weak Enhancer                 | 0.021      | 0.230 (0.116)  | 10.914 (5.504)  | 0.069              |
| Weak Enhancer + 500bp         | 0.089      | 0.424 (0.108)  | 4.762 (1.217)   | 0.002              |

(o) Rheumatoid arthritis

Supplementary Table 5: Proportion of heritability and enrichment for different functional categories for 17 traits.

| Annotation                    | Prop. SNPs | Prop. $h^2$    | Enrichment     | Enrichment P-value |
|-------------------------------|------------|----------------|----------------|--------------------|
| Coding                        | 0.015      | 0.125 (0.071)  | 8.551 (4.849)  | 0.123              |
| Coding + 500bp                | 0.065      | 0.352 (0.065)  | 5.453 (1.009)  | 0.000              |
| Conserved                     | 0.026      | 0.069 (0.072)  | 2.640 (2.765)  | 0.545              |
| Conserved + 500bp             | 0.333      | 0.919 (0.099)  | 2.765 (0.296)  | 0.000              |
| CTCF                          | 0.024      | -0.050 (0.086) | -2.081 (3.627) | 0.384              |
| CTCF + 500bp                  | 0.071      | -0.127 (0.083) | -1.781 (1.168) | 0.017              |
| DGF                           | 0.138      | 0.770 (0.182)  | 5.600 (1.323)  | 0.001              |
| DGF + 500bp                   | 0.542      | 1.088 (0.089)  | 2.009 (0.165)  | 0.000              |
| DHS peaks                     | 0.112      | 0.303 (0.136)  | 2.713 (1.213)  | 0.166              |
| DHS                           | 0.168      | 0.154 (0.177)  | 0.915 (1.053)  | 0.936              |
| DHS + 500bp                   | 0.499      | 0.713 (0.126)  | 1.430 (0.253)  | 0.095              |
| FANTOM5 Enhancer              | 0.004      | 0.169 (0.042)  | 39.042 (9.650) | 0.000              |
| FANTOM5 Enhancer + 500bp      | 0.019      | 0.428 (0.074)  | 22.468 (3.865) | 0.000              |
| Enhancer                      | 0.063      | 0.237 (0.097)  | 3.740 (1.529)  | 0.082              |
| Enhancer + 500bp              | 0.154      | 0.554 (0.106)  | 3.600 (0.690)  | 0.000              |
| Fetal DHS                     | 0.085      | 0.398 (0.133)  | 4.693 (1.571)  | 0.025              |
| Fetal DHS + 500bp             | 0.285      | 0.686 (0.132)  | 2.406 (0.462)  | 0.004              |
| H3K27ac <sup>18</sup>         | 0.391      | 0.838 (0.049)  | 2.143 (0.126)  | 0.000              |
| H3K27ac <sup>18</sup> + 500bp | 0.423      | 0.840 (0.060)  | 1.987 (0.141)  | 0.000              |
| H3K27ac <sup>17</sup>         | 0.269      | 0.768 (0.121)  | 2.849 (0.449)  | 0.000              |
| H3K27ac <sup>17</sup> + 500bp | 0.336      | 0.748 (0.074)  | 2.227 (0.220)  | 0.000              |
| H3K4me1 peaks                 | 0.171      | 0.506 (0.169)  | 2.953 (0.985)  | 0.054              |
| H3K4me1                       | 0.427      | 0.742 (0.132)  | 1.739 (0.310)  | 0.017              |
| H3K4me1 + 500bp               | 0.609      | 1.004 (0.067)  | 1.648 (0.111)  | 0.000              |
| H3K4me3 peaks                 | 0.042      | 0.318 (0.157)  | 7.621 (3.764)  | 0.086              |
| H3K4me3                       | 0.133      | 0.675 (0.147)  | 5.064 (1.099)  | 0.000              |
| H3K4me3 + 500bp               | 0.255      | 0.669 (0.126)  | 2.618 (0.491)  | 0.001              |
| H3K9ac peaks                  | 0.039      | 0.082 (0.113)  | 2.109 (2.923)  | 0.704              |
| H3K9ac                        | 0.126      | 0.231 (0.122)  | 1.834 (0.965)  | 0.391              |
| H3K9ac + 500bp                | 0.231      | 0.565 (0.101)  | 2.450 (0.437)  | 0.001              |
| Intron                        | 0.387      | 0.400 (0.068)  | 1.032 (0.176)  | 0.857              |
| Intron + 500bp                | 0.397      | 0.504 (0.054)  | 1.268 (0.135)  | 0.042              |
| PromoterFlanking              | 0.008      | -0.054 (0.045) | -6.361 (5.290) | 0.162              |
| PromoterFlanking + 500bp      | 0.033      | 0.018 (0.065)  | 0.535 (1.955)  | 0.810              |
| Promoter                      | 0.031      | 0.146 (0.064)  | 4.685 (2.051)  | 0.080              |
| Promoter + 500bp              | 0.039      | 0.137 (0.048)  | 3.553 (1.230)  | 0.036              |
| Repressed                     | 0.461      | 0.102 (0.115)  | 0.222 (0.249)  | 0.001              |
| Repressed + 500bp             | 0.719      | 0.392 (0.052)  | 0.545 (0.072)  | 0.000              |
| Super Enhancer                | 0.168      | 0.554 (0.050)  | 3.289 (0.296)  | 0.000              |
| Super Enhancer + 500bp        | 0.172      | 0.594 (0.046)  | 3.462 (0.268)  | 0.000              |
| TFBS                          | 0.132      | 0.614 (0.195)  | 4.635 (1.470)  | 0.017              |
| TFBS + 500bp                  | 0.343      | 0.730 (0.132)  | 2.126 (0.384)  | 0.004              |
| Transcribed                   | 0.345      | 0.402 (0.124)  | 1.163 (0.360)  | 0.641              |
| Transcribed + 500bp           | 0.763      | 0.747 (0.081)  | 0.978 (0.106)  | 0.837              |
| TSS                           | 0.018      | 0.248 (0.073)  | 13.613 (4.032) | 0.003              |
| TSS + 500bp                   | 0.035      | 0.398 (0.070)  | 11.424 (2.013) | 0.000              |
| 3-prime UTR                   | 0.011      | 0.021 (0.035)  | 1.909 (3.157)  | 0.773              |
| 3-prime UTR + 500bp           | 0.027      | 0.171 (0.076)  | 6.347 (2.824)  | 0.061              |
| 5-prime UTR                   | 0.005      | 0.040 (0.045)  | 7.436 (8.305)  | 0.438              |
| 5-prime UTR + 500bp           | 0.028      | 0.151 (0.047)  | 5.413 (1.707)  | 0.015              |
| Weak Enhancer                 | 0.021      | 0.101 (0.068)  | 4.797 (3.239)  | 0.252              |
| Weak Enhancer + 500bp         | 0.089      | 0.258 (0.084)  | 2.903 (0.942)  | 0.040              |

(p) Crohn's disease

Supplementary Table 5: Proportion of heritability and enrichment for different functional categories for 17 traits.

| Annotation                    | Prop. SNPs | Prop. $h^2$    | Enrichment      | Enrichment P-value |
|-------------------------------|------------|----------------|-----------------|--------------------|
| Coding                        | 0.015      | 0.172 (0.088)  | 11.727 (6.016)  | 0.071              |
| Coding + 500bp                | 0.065      | 0.421 (0.079)  | 6.529 (1.223)   | 0.000              |
| Conserved                     | 0.026      | 0.203 (0.090)  | 7.786 (3.463)   | 0.048              |
| Conserved + 500bp             | 0.333      | 0.878 (0.123)  | 2.639 (0.370)   | 0.000              |
| CTCF                          | 0.024      | -0.101 (0.106) | -4.218 (4.448)  | 0.223              |
| CTCF + 500bp                  | 0.071      | -0.077 (0.111) | -1.087 (1.560)  | 0.174              |
| DGF                           | 0.138      | 0.901 (0.247)  | 6.546 (1.797)   | 0.002              |
| DGF + 500bp                   | 0.542      | 1.117 (0.134)  | 2.063 (0.248)   | 0.000              |
| DHS peaks                     | 0.112      | 0.706 (0.217)  | 6.319 (1.943)   | 0.005              |
| DHS                           | 0.168      | 0.416 (0.236)  | 2.481 (1.407)   | 0.287              |
| DHS + 500bp                   | 0.499      | 0.815 (0.164)  | 1.635 (0.330)   | 0.069              |
| FANTOM5 Enhancer              | 0.004      | 0.181 (0.049)  | 41.783 (11.197) | 0.000              |
| FANTOM5 Enhancer + 500bp      | 0.019      | 0.285 (0.076)  | 14.939 (3.999)  | 0.000              |
| Enhancer                      | 0.063      | 0.348 (0.135)  | 5.490 (2.133)   | 0.035              |
| Enhancer + 500bp              | 0.154      | 0.699 (0.138)  | 4.544 (0.899)   | 0.000              |
| Fetal DHS                     | 0.085      | 0.360 (0.186)  | 4.243 (2.191)   | 0.147              |
| Fetal DHS + 500bp             | 0.285      | 0.550 (0.170)  | 1.929 (0.597)   | 0.138              |
| H3K27ac <sup>18</sup>         | 0.391      | 0.989 (0.083)  | 2.527 (0.213)   | 0.000              |
| H3K27ac <sup>18</sup> + 500bp | 0.423      | 1.031 (0.088)  | 2.440 (0.209)   | 0.000              |
| H3K27ac <sup>17</sup>         | 0.269      | 0.848 (0.163)  | 3.148 (0.605)   | 0.000              |
| H3K27ac <sup>17</sup> + 500bp | 0.336      | 0.813 (0.133)  | 2.420 (0.396)   | 0.000              |
| H3K4me1 peaks                 | 0.171      | 0.710 (0.243)  | 4.142 (1.419)   | 0.029              |
| H3K4me1                       | 0.427      | 0.774 (0.173)  | 1.814 (0.406)   | 0.049              |
| H3K4me1 + 500bp               | 0.609      | 0.911 (0.078)  | 1.495 (0.128)   | 0.001              |
| H3K4me3 peaks                 | 0.042      | 0.264 (0.174)  | 6.318 (4.164)   | 0.207              |
| H3K4me3                       | 0.133      | 0.709 (0.179)  | 5.321 (1.345)   | 0.001              |
| H3K4me3 + 500bp               | 0.255      | 0.707 (0.137)  | 2.767 (0.536)   | 0.003              |
| H3K9ac peaks                  | 0.039      | 0.276 (0.144)  | 7.125 (3.713)   | 0.102              |
| H3K9ac                        | 0.126      | 0.584 (0.172)  | 4.634 (1.365)   | 0.010              |
| H3K9ac + 500bp                | 0.231      | 0.692 (0.122)  | 3.002 (0.531)   | 0.000              |
| Intron                        | 0.387      | 0.364 (0.082)  | 0.941 (0.211)   | 0.777              |
| Intron + 500bp                | 0.397      | 0.506 (0.055)  | 1.275 (0.138)   | 0.055              |
| PromoterFlanking              | 0.008      | 0.030 (0.055)  | 3.586 (6.533)   | 0.693              |
| PromoterFlanking + 500bp      | 0.033      | 0.049 (0.080)  | 1.464 (2.381)   | 0.845              |
| Promoter                      | 0.031      | 0.150 (0.072)  | 4.799 (2.305)   | 0.110              |
| Promoter + 500bp              | 0.039      | 0.185 (0.054)  | 4.797 (1.390)   | 0.004              |
| Repressed                     | 0.461      | 0.065 (0.160)  | 0.140 (0.346)   | 0.014              |
| Repressed + 500bp             | 0.719      | 0.275 (0.072)  | 0.383 (0.100)   | 0.000              |
| Super Enhancer                | 0.168      | 0.567 (0.062)  | 3.365 (0.367)   | 0.000              |
| Super Enhancer + 500bp        | 0.172      | 0.616 (0.057)  | 3.593 (0.330)   | 0.000              |
| TFBS                          | 0.132      | 1.144 (0.282)  | 8.637 (2.133)   | 0.001              |
| TFBS + 500bp                  | 0.343      | 0.660 (0.173)  | 1.921 (0.503)   | 0.070              |
| Transcribed                   | 0.345      | 0.446 (0.163)  | 1.291 (0.471)   | 0.527              |
| Transcribed + 500bp           | 0.763      | 0.677 (0.106)  | 0.888 (0.139)   | 0.420              |
| TSS                           | 0.018      | 0.209 (0.065)  | 11.447 (3.561)  | 0.004              |
| TSS + 500bp                   | 0.035      | 0.307 (0.076)  | 8.827 (2.189)   | 0.000              |
| 3-prime UTR                   | 0.011      | 0.034 (0.053)  | 3.111 (4.774)   | 0.655              |
| 3-prime UTR + 500bp           | 0.027      | 0.176 (0.065)  | 6.524 (2.423)   | 0.023              |
| 5-prime UTR                   | 0.005      | 0.097 (0.043)  | 17.831 (7.966)  | 0.033              |
| 5-prime UTR + 500bp           | 0.028      | 0.204 (0.073)  | 7.325 (2.617)   | 0.026              |
| Weak Enhancer                 | 0.021      | 0.057 (0.099)  | 2.723 (4.685)   | 0.712              |
| Weak Enhancer + 500bp         | 0.089      | 0.328 (0.106)  | 3.690 (1.191)   | 0.022              |

(q) Ulcerative colitis

Supplementary Table 5: Proportion of heritability and enrichment for different functional categories for 17 traits.

| Annotation                    | Prop. SNPs | Prop. $h^2$   | Enrichment     | Enrichment P-value |
|-------------------------------|------------|---------------|----------------|--------------------|
| Coding                        | 0.015      | 0.123 (0.052) | 8.410 (3.529)  | 0.042              |
| Coding + 500bp                | 0.065      | 0.119 (0.057) | 1.846 (0.883)  | 0.340              |
| Conserved                     | 0.026      | 0.404 (0.085) | 15.497 (3.251) | 0.000              |
| Conserved + 500bp             | 0.333      | 0.797 (0.098) | 2.397 (0.296)  | 0.000              |
| CTCF                          | 0.024      | 0.006 (0.072) | 0.266 (3.040)  | 0.809              |
| CTCF + 500bp                  | 0.071      | 0.050 (0.084) | 0.700 (1.185)  | 0.799              |
| DGF                           | 0.138      | 0.050 (0.184) | 0.360 (1.337)  | 0.632              |
| DGF + 500bp                   | 0.542      | 0.540 (0.130) | 0.997 (0.239)  | 0.989              |
| DHS peaks                     | 0.112      | 0.099 (0.170) | 0.886 (1.519)  | 0.940              |
| DHS                           | 0.168      | 0.194 (0.203) | 1.158 (1.207)  | 0.896              |
| DHS + 500bp                   | 0.499      | 1.105 (0.140) | 2.215 (0.280)  | 0.000              |
| FANTOM5 Enhancer              | 0.004      | 0.034 (0.032) | 7.781 (7.318)  | 0.354              |
| FANTOM5 Enhancer + 500bp      | 0.019      | 0.148 (0.055) | 7.754 (2.901)  | 0.018              |
| Enhancer                      | 0.063      | 0.132 (0.099) | 2.082 (1.564)  | 0.488              |
| Enhancer + 500bp              | 0.154      | 0.374 (0.099) | 2.427 (0.643)  | 0.030              |
| Fetal DHS                     | 0.085      | 0.319 (0.143) | 3.760 (1.688)  | 0.103              |
| Fetal DHS + 500bp             | 0.285      | 0.884 (0.136) | 3.103 (0.476)  | 0.000              |
| H3K27ac <sup>18</sup>         | 0.391      | 0.474 (0.059) | 1.211 (0.150)  | 0.166              |
| H3K27ac <sup>18</sup> + 500bp | 0.423      | 0.447 (0.080) | 1.057 (0.189)  | 0.763              |
| H3K27ac <sup>17</sup>         | 0.269      | 0.268 (0.107) | 0.993 (0.397)  | 0.986              |
| H3K27ac <sup>17</sup> + 500bp | 0.336      | 0.450 (0.096) | 1.340 (0.285)  | 0.238              |
| H3K4me1 peaks                 | 0.171      | 0.463 (0.167) | 2.704 (0.977)  | 0.078              |
| H3K4me1                       | 0.427      | 0.709 (0.144) | 1.662 (0.337)  | 0.052              |
| H3K4me1 + 500bp               | 0.609      | 0.721 (0.079) | 1.184 (0.129)  | 0.166              |
| H3K4me3 peaks                 | 0.042      | 0.122 (0.106) | 2.916 (2.535)  | 0.445              |
| H3K4me3                       | 0.133      | 0.378 (0.096) | 2.832 (0.722)  | 0.009              |
| H3K4me3 + 500bp               | 0.255      | 0.391 (0.102) | 1.529 (0.397)  | 0.181              |
| H3K9ac peaks                  | 0.039      | 0.338 (0.104) | 8.710 (2.685)  | 0.003              |
| H3K9ac                        | 0.126      | 0.450 (0.103) | 3.568 (0.817)  | 0.002              |
| H3K9ac + 500bp                | 0.231      | 0.412 (0.091) | 1.785 (0.393)  | 0.042              |
| Intron                        | 0.387      | 0.436 (0.052) | 1.125 (0.134)  | 0.342              |
| Intron + 500bp                | 0.397      | 0.475 (0.040) | 1.196 (0.100)  | 0.044              |
| PromoterFlanking              | 0.008      | 0.057 (0.052) | 6.773 (6.187)  | 0.347              |
| PromoterFlanking + 500bp      | 0.033      | 0.088 (0.055) | 2.634 (1.638)  | 0.315              |
| Promoter                      | 0.031      | 0.065 (0.065) | 2.093 (2.082)  | 0.598              |
| Promoter + 500bp              | 0.039      | 0.023 (0.041) | 0.597 (1.060)  | 0.703              |
| Repressed                     | 0.461      | 0.393 (0.147) | 0.852 (0.319)  | 0.640              |
| Repressed + 500bp             | 0.719      | 0.546 (0.058) | 0.759 (0.081)  | 0.003              |
| Super Enhancer                | 0.168      | 0.214 (0.038) | 1.269 (0.226)  | 0.239              |
| Super Enhancer + 500bp        | 0.172      | 0.213 (0.040) | 1.243 (0.236)  | 0.309              |
| TFBS                          | 0.132      | 0.285 (0.133) | 2.152 (1.002)  | 0.252              |
| TFBS + 500bp                  | 0.343      | 0.494 (0.154) | 1.438 (0.450)  | 0.329              |
| Transcribed                   | 0.345      | 0.330 (0.128) | 0.955 (0.371)  | 0.905              |
| Transcribed + 500bp           | 0.763      | 0.691 (0.093) | 0.906 (0.121)  | 0.439              |
| TSS                           | 0.018      | 0.055 (0.052) | 3.025 (2.838)  | 0.476              |
| TSS + 500bp                   | 0.035      | 0.185 (0.052) | 5.314 (1.496)  | 0.005              |
| 3-prime UTR                   | 0.011      | 0.025 (0.035) | 2.299 (3.173)  | 0.683              |
| 3-prime UTR + 500bp           | 0.027      | 0.045 (0.039) | 1.668 (1.435)  | 0.643              |
| 5-prime UTR                   | 0.005      | 0.068 (0.037) | 12.546 (6.780) | 0.091              |
| 5-prime UTR + 500bp           | 0.028      | 0.152 (0.048) | 5.450 (1.733)  | 0.011              |
| Weak Enhancer                 | 0.021      | 0.062 (0.077) | 2.920 (3.667)  | 0.600              |
| Weak Enhancer + 500bp         | 0.089      | 0.299 (0.084) | 3.357 (0.940)  | 0.015              |

(r) Went to college (yes/no)

Supplementary Table 5: Proportion of heritability and enrichment for different functional categories for 17 traits.

| Annotation                    | Prop. SNPs | Prop. $h^2$    | Enrichment     | Enrichment P-value |
|-------------------------------|------------|----------------|----------------|--------------------|
| Coding                        | 0.015      | 0.095 (0.066)  | 6.501 (4.510)  | 0.234              |
| Coding + 500bp                | 0.065      | 0.453 (0.073)  | 7.018 (1.126)  | 0.000              |
| Conserved                     | 0.026      | 0.178 (0.091)  | 6.834 (3.494)  | 0.100              |
| Conserved + 500bp             | 0.333      | 0.777 (0.110)  | 2.335 (0.331)  | 0.000              |
| CTCF                          | 0.024      | 0.068 (0.090)  | 2.834 (3.795)  | 0.625              |
| CTCF + 500bp                  | 0.071      | 0.022 (0.095)  | 0.310 (1.339)  | 0.595              |
| DGF                           | 0.138      | 0.425 (0.191)  | 3.090 (1.390)  | 0.137              |
| DGF + 500bp                   | 0.542      | 0.747 (0.097)  | 1.379 (0.179)  | 0.043              |
| DHS peaks                     | 0.112      | 0.264 (0.191)  | 2.362 (1.713)  | 0.431              |
| DHS                           | 0.168      | 0.417 (0.226)  | 2.488 (1.349)  | 0.273              |
| DHS + 500bp                   | 0.499      | 0.863 (0.133)  | 1.731 (0.267)  | 0.011              |
| FANTOM5 Enhancer              | 0.004      | -0.042 (0.038) | -9.708 (8.772) | 0.240              |
| FANTOM5 Enhancer + 500bp      | 0.019      | 0.033 (0.047)  | 1.731 (2.474)  | 0.763              |
| Enhancer                      | 0.063      | 0.352 (0.126)  | 5.561 (1.997)  | 0.023              |
| Enhancer + 500bp              | 0.154      | 0.556 (0.101)  | 3.612 (0.654)  | 0.000              |
| Fetal DHS                     | 0.085      | 0.182 (0.167)  | 2.146 (1.970)  | 0.557              |
| Fetal DHS + 500bp             | 0.285      | 0.653 (0.117)  | 2.290 (0.412)  | 0.006              |
| H3K27ac <sup>18</sup>         | 0.391      | 0.809 (0.073)  | 2.069 (0.186)  | 0.000              |
| H3K27ac <sup>18</sup> + 500bp | 0.423      | 0.962 (0.062)  | 2.277 (0.147)  | 0.000              |
| H3K27ac <sup>17</sup>         | 0.269      | 0.933 (0.203)  | 3.461 (0.752)  | 0.003              |
| H3K27ac <sup>17</sup> + 500bp | 0.336      | 0.867 (0.081)  | 2.579 (0.240)  | 0.000              |
| H3K4me1 peaks                 | 0.171      | 0.534 (0.241)  | 3.117 (1.408)  | 0.148              |
| H3K4me1                       | 0.427      | 1.092 (0.126)  | 2.560 (0.295)  | 0.000              |
| H3K4me1 + 500bp               | 0.609      | 1.051 (0.060)  | 1.726 (0.099)  | 0.000              |
| H3K4me3 peaks                 | 0.042      | -0.014 (0.149) | -0.332 (3.563) | 0.704              |
| H3K4me3                       | 0.133      | 0.523 (0.128)  | 3.926 (0.963)  | 0.003              |
| H3K4me3 + 500bp               | 0.255      | 0.948 (0.145)  | 3.711 (0.566)  | 0.000              |
| H3K9ac peaks                  | 0.039      | -0.151 (0.167) | -3.886 (4.312) | 0.247              |
| H3K9ac                        | 0.126      | 0.522 (0.139)  | 4.143 (1.103)  | 0.004              |
| H3K9ac + 500bp                | 0.231      | 0.972 (0.173)  | 4.217 (0.749)  | 0.000              |
| Intron                        | 0.387      | 0.486 (0.059)  | 1.254 (0.153)  | 0.089              |
| Intron + 500bp                | 0.397      | 0.626 (0.045)  | 1.576 (0.113)  | 0.000              |
| PromoterFlanking              | 0.008      | -0.009 (0.055) | -1.042 (6.491) | 0.752              |
| PromoterFlanking + 500bp      | 0.033      | 0.230 (0.085)  | 6.877 (2.540)  | 0.024              |
| Promoter                      | 0.031      | 0.144 (0.057)  | 4.623 (1.815)  | 0.045              |
| Promoter + 500bp              | 0.039      | 0.164 (0.041)  | 4.257 (1.061)  | 0.002              |
| Repressed                     | 0.461      | -0.048 (0.116) | -0.105 (0.251) | 0.000              |
| Repressed + 500bp             | 0.719      | 0.261 (0.066)  | 0.363 (0.091)  | 0.000              |
| Super Enhancer                | 0.168      | 0.454 (0.056)  | 2.697 (0.335)  | 0.000              |
| Super Enhancer + 500bp        | 0.172      | 0.481 (0.053)  | 2.802 (0.311)  | 0.000              |
| TFBS                          | 0.132      | 0.708 (0.196)  | 5.347 (1.478)  | 0.007              |
| TFBS + 500bp                  | 0.343      | 0.666 (0.121)  | 1.939 (0.352)  | 0.008              |
| Transcribed                   | 0.345      | 0.562 (0.111)  | 1.627 (0.320)  | 0.057              |
| Transcribed + 500bp           | 0.763      | 0.700 (0.093)  | 0.918 (0.122)  | 0.492              |
| TSS                           | 0.018      | 0.054 (0.078)  | 2.938 (4.295)  | 0.648              |
| TSS + 500bp                   | 0.035      | 0.431 (0.093)  | 12.374 (2.679) | 0.000              |
| 3-prime UTR                   | 0.011      | 0.030 (0.035)  | 2.722 (3.160)  | 0.583              |
| 3-prime UTR + 500bp           | 0.027      | 0.108 (0.037)  | 4.008 (1.362)  | 0.030              |
| 5-prime UTR                   | 0.005      | 0.000 (0.035)  | 0.023 (6.478)  | 0.878              |
| 5-prime UTR + 500bp           | 0.028      | 0.108 (0.058)  | 3.883 (2.074)  | 0.167              |
| Weak Enhancer                 | 0.021      | 0.123 (0.093)  | 5.823 (4.391)  | 0.282              |
| Weak Enhancer + 500bp         | 0.089      | 0.289 (0.101)  | 3.251 (1.134)  | 0.055              |

(s) Total cholesterol

Supplementary Table 5: Proportion of heritability and enrichment for different functional categories for 17 traits.



| Annotation                    | Prop. SNPs | Prop. $h^2$    | Enrichment     | Enrichment P-value |
|-------------------------------|------------|----------------|----------------|--------------------|
| Coding                        | 0.015      | 0.108 (0.013)  | 7.359 (0.861)  | 0.000              |
| Coding + 500bp                | 0.065      | 0.192 (0.030)  | 2.978 (0.469)  | 0.000              |
| Conserved                     | 0.026      | 0.359 (0.042)  | 13.758 (1.606) | 0.000              |
| Conserved + 500bp             | 0.333      | 0.656 (0.026)  | 1.972 (0.079)  | 0.000              |
| CTCF                          | 0.024      | -0.013 (0.019) | -0.566 (0.810) | 0.256              |
| CTCF + 500bp                  | 0.071      | 0.043 (0.020)  | 0.599 (0.279)  | 0.148              |
| DGF                           | 0.138      | 0.367 (0.097)  | 2.667 (0.702)  | 0.018              |
| DGF + 500bp                   | 0.542      | 0.748 (0.071)  | 1.381 (0.132)  | 0.005              |
| DHS peaks                     | 0.112      | 0.221 (0.065)  | 1.976 (0.584)  | 0.073              |
| DHS                           | 0.168      | 0.279 (0.070)  | 1.665 (0.420)  | 0.098              |
| DHS + 500bp                   | 0.499      | 0.756 (0.040)  | 1.515 (0.081)  | 0.000              |
| FANTOM5 Enhancer              | 0.004      | -0.004 (0.009) | -0.853 (2.158) | 0.507              |
| FANTOM5 Enhancer + 500bp      | 0.019      | 0.016 (0.018)  | 0.817 (0.920)  | 0.686              |
| Enhancer                      | 0.063      | 0.242 (0.051)  | 3.828 (0.811)  | 0.000              |
| Enhancer + 500bp              | 0.154      | 0.349 (0.043)  | 2.266 (0.280)  | 0.000              |
| Fetal DHS                     | 0.085      | 0.237 (0.044)  | 2.791 (0.518)  | 0.001              |
| Fetal DHS + 500bp             | 0.285      | 0.558 (0.059)  | 1.958 (0.207)  | 0.000              |
| H3K27ac <sup>18</sup>         | 0.391      | 0.627 (0.055)  | 1.604 (0.141)  | 0.000              |
| H3K27ac <sup>18</sup> + 500bp | 0.423      | 0.664 (0.060)  | 1.571 (0.142)  | 0.000              |
| H3K27ac <sup>17</sup>         | 0.269      | 0.485 (0.056)  | 1.799 (0.207)  | 0.000              |
| H3K27ac <sup>17</sup> + 500bp | 0.336      | 0.607 (0.042)  | 1.807 (0.124)  | 0.000              |
| H3K4me1 peaks                 | 0.171      | 0.464 (0.041)  | 2.710 (0.242)  | 0.000              |
| H3K4me1                       | 0.427      | 0.807 (0.066)  | 1.891 (0.156)  | 0.000              |
| H3K4me1 + 500bp               | 0.609      | 0.899 (0.041)  | 1.476 (0.067)  | 0.000              |
| H3K4me3 peaks                 | 0.042      | 0.166 (0.026)  | 3.961 (0.619)  | 0.000              |
| H3K4me3                       | 0.133      | 0.345 (0.045)  | 2.590 (0.335)  | 0.000              |
| H3K4me3 + 500bp               | 0.255      | 0.488 (0.058)  | 1.909 (0.227)  | 0.000              |
| H3K9ac peaks                  | 0.039      | 0.259 (0.025)  | 6.671 (0.636)  | 0.000              |
| H3K9ac                        | 0.126      | 0.409 (0.057)  | 3.241 (0.452)  | 0.000              |
| H3K9ac + 500bp                | 0.231      | 0.502 (0.041)  | 2.178 (0.178)  | 0.000              |
| Intron                        | 0.387      | 0.467 (0.014)  | 1.206 (0.035)  | 0.004              |
| Intron + 500bp                | 0.397      | 0.528 (0.015)  | 1.329 (0.037)  | 0.000              |
| PromoterFlanking              | 0.008      | 0.010 (0.011)  | 1.136 (1.347)  | 0.974              |
| PromoterFlanking + 500bp      | 0.033      | 0.083 (0.018)  | 2.488 (0.544)  | 0.020              |
| Promoter                      | 0.031      | 0.091 (0.016)  | 2.923 (0.522)  | 0.006              |
| Promoter + 500bp              | 0.039      | 0.079 (0.017)  | 2.043 (0.441)  | 0.023              |
| Repressed                     | 0.461      | 0.268 (0.065)  | 0.580 (0.141)  | 0.004              |
| Repressed + 500bp             | 0.719      | 0.443 (0.049)  | 0.616 (0.069)  | 0.000              |
| Super Enhancer                | 0.168      | 0.303 (0.036)  | 1.796 (0.214)  | 0.000              |
| Super Enhancer + 500bp        | 0.172      | 0.316 (0.038)  | 1.843 (0.221)  | 0.000              |
| TFBS                          | 0.132      | 0.440 (0.065)  | 3.320 (0.491)  | 0.000              |
| TFBS + 500bp                  | 0.343      | 0.481 (0.054)  | 1.400 (0.156)  | 0.016              |
| Transcribed                   | 0.345      | 0.430 (0.039)  | 1.244 (0.112)  | 0.108              |
| Transcribed + 500bp           | 0.763      | 0.726 (0.028)  | 0.952 (0.037)  | 0.166              |
| TSS                           | 0.018      | 0.105 (0.024)  | 5.770 (1.306)  | 0.001              |
| TSS + 500bp                   | 0.035      | 0.171 (0.029)  | 4.915 (0.842)  | 0.000              |
| 3-prime UTR                   | 0.011      | 0.053 (0.010)  | 4.781 (0.873)  | 0.007              |
| 3-prime UTR + 500bp           | 0.027      | 0.075 (0.011)  | 2.793 (0.422)  | 0.003              |
| 5-prime UTR                   | 0.005      | 0.029 (0.008)  | 5.305 (1.404)  | 0.007              |
| 5-prime UTR + 500bp           | 0.028      | 0.067 (0.011)  | 2.395 (0.385)  | 0.001              |
| Weak Enhancer                 | 0.021      | 0.070 (0.024)  | 3.328 (1.141)  | 0.002              |
| Weak Enhancer + 500bp         | 0.089      | 0.190 (0.030)  | 2.138 (0.343)  | 0.000              |
| 0.0 < DAF < 0.1               | 0.175      | 0.071 (0.009)  | 0.408 (0.054)  | 0.000              |
| 0.1 < DAF < 0.2               | 0.211      | 0.215 (0.013)  | 1.021 (0.063)  | 0.811              |
| 0.2 < DAF < 0.3               | 0.144      | 0.143 (0.019)  | 0.994 (0.132)  | 0.836              |
| 0.3 < DAF < 0.4               | 0.111      | 0.142 (0.023)  | 1.284 (0.211)  | 0.192              |
| 0.4 < DAF < 0.6               | 0.161      | 0.223 (0.012)  | 1.387 (0.073)  | 0.000              |
| 0.6 < DAF < 0.8               | 0.116      | 0.175 (0.027)  | 1.514 (0.235)  | 0.019              |

Supplementary Table 6: Proportion of heritability and enrichment for different functional categories, meta-analyzed over nine traits, including derived allele frequency bins in the model (Online Methods).

| Cell type                           | cell-type group  | Mark    | $-\log_{10}(p)$ |
|-------------------------------------|------------------|---------|-----------------|
| Chondrogenic dif**                  | Connective/Bone  | H3K27ac | 6.81            |
| Penis foreskin fibroblast primary** | Connective/Bone  | H3K4me1 | 6.43            |
| Fetal lung**                        | Cardiovascular   | H3K4me1 | 6.34            |
| Fetal stomach**                     | GI               | H3K4me1 | 5.48            |
| Colon smooth muscle*                | GI               | H3K4me1 | 4.64            |
| Aorta*                              | Cardiovascular   | H3K4me3 | 4.64            |
| Fetal lung*                         | Cardiovascular   | H3K9ac  | 4.31            |
| Stomach smooth muscle*              | GI               | H3K4me3 | 4.26            |
| Osteoblast*                         | Connective/Bone  | H3K27ac | 4.04            |
| Penis foreskin fibroblast primary*  | Connective/Bone  | H3K4me3 | 3.96            |
| Stomach smooth muscle*              | GI               | H3K4me1 | 3.94            |
| Fetal leg muscle*                   | Skeletal Muscle  | H3K4me3 | 3.91            |
| Fetal trunk muscle*                 | Skeletal Muscle  | H3K4me3 | 3.72            |
| Rectal smooth muscle*               | GI               | H3K4me3 | 3.57            |
| Fetal lung*                         | Cardiovascular   | H3K4me3 | 3.37            |
| Rectal smooth muscle*               | GI               | H3K4me1 | 3.32            |
| Fetal placenta*                     | Other            | H3K4me3 | 3.26            |
| Adipose nuclei*                     | Other            | H3K4me1 | 3.1             |
| Ovary*                              | Other            | H3K4me1 | 3.06            |
| Fetal large intestine*              | GI               | H3K4me3 | 3.05            |
| Placenta chorion*                   | Other            | H3K4me3 | 2.98            |
| CD34 primary*                       | Immune           | H3K4me1 | 2.96            |
| Penis foreskin melanocyte primary*  | Other            | H3K4me1 | 2.95            |
| Skeletal muscle*                    | Skeletal Muscle  | H3K9ac  | 2.93            |
| Mobilized CD34 primary*             | Immune           | H3K4me1 | 2.88            |
| Fetal stomach*                      | GI               | H3K4me3 | 2.87            |
| Mobilized CD34 primary*             | Immune           | H3K4me3 | 2.87            |
| Fetal adrenal*                      | Adrenal/Pancreas | H3K4me3 | 2.86            |
| Breast fibroblast primary*          | Connective/Bone  | H3K4me3 | 2.85            |
| Duodenum smooth muscle*             | GI               | H3K4me1 | 2.81            |
| Colon smooth muscle*                | GI               | H3K4me3 | 2.76            |
| Ovary*                              | Other            | H3K4me3 | 2.7             |
| Fetal brain*                        | CNS              | H3K4me3 | 2.62            |
| Skeletal muscle*                    | Skeletal Muscle  | H3K4me1 | 2.6             |
| Fetal small intestine*              | GI               | H3K4me3 | 2.6             |
| Colon smooth muscle*                | GI               | H3K27ac | 2.57            |
| Lung*                               | Cardiovascular   | H3K4me3 | 2.56            |
| Liver (UCSD)*                       | Liver            | H3K4me3 | 2.53            |
| Esophagus*                          | GI               | H3K4me3 | 2.53            |
| Placenta amnion*                    | Other            | H3K4me3 | 2.48            |
| Right ventricle*                    | Cardiovascular   | H3K4me3 | 2.47            |
| Sigmoid colon*                      | GI               | H3K4me3 | 2.44            |
| Fetal leg muscle*                   | Skeletal Muscle  | H3K4me1 | 2.44            |
| Colonic mucosa*                     | GI               | H3K4me3 | 2.18            |
| Right atrium*                       | Cardiovascular   | H3K4me3 | 2.14            |
| CD34 primary*                       | Immune           | H3K4me3 | 2.13            |
| Gastric*                            | GI               | H3K4me3 | 2.08            |
| Skeletal muscle*                    | Skeletal Muscle  | H3K4me3 | 2.07            |
| Lung*                               | Cardiovascular   | H3K4me1 | 2.06            |
| Pancreatic islets*                  | Adrenal/Pancreas | H3K4me3 | 2.05            |
| Adipose nuclei*                     | Other            | H3K9ac  | 2.01            |
| Right atrium*                       | Cardiovascular   | H3K4me1 | 1.98            |
| Stomach smooth muscle*              | GI               | H3K27ac | 1.96            |
| Rectal smooth muscle*               | GI               | H3K27ac | 1.95            |
| Breast fibroblast primary*          | Connective/Bone  | H3K4me1 | 1.93            |
| Germinal matrix*                    | CNS              | H3K4me3 | 1.92            |
| Small intestine*                    | GI               | H3K4me3 | 1.91            |
| Fetal placenta*                     | Other            | H3K4me1 | 1.91            |

(a) Height

Supplementary Table 7: Enrichment of top cell types for 17 traits. \* = significant at FDR < 0.05. \*\* = significant at  $p < 0.05$  after correcting for multiple hypotheses.

| Cell type                            | cell-type group  | Mark    | $-\log_{10}(p)$ |
|--------------------------------------|------------------|---------|-----------------|
| Fetal brain*                         | CNS              | H3K4me3 | 4.48            |
| Penis foreskin fibroblast primary*   | Connective/Bone  | H3K4me3 | 4.43            |
| Inferior temporal lobe*              | CNS              | H3K4me1 | 4.3             |
| Mid frontal lobe*                    | CNS              | H3K9ac  | 4.25            |
| Anterior caudate*                    | CNS              | H3K4me3 | 4.25            |
| Mid frontal lobe*                    | CNS              | H3K27ac | 3.96            |
| Anterior caudate*                    | CNS              | H3K9ac  | 3.91            |
| Cingulate gyrus*                     | CNS              | H3K4me1 | 3.73            |
| Inferior temporal lobe*              | CNS              | H3K4me3 | 3.73            |
| Penis foreskin keratinocyte primary* | Other            | H3K9ac  | 3.72            |
| Mid frontal lobe*                    | CNS              | H3K4me3 | 3.71            |
| Hippocampus middle*                  | CNS              | H3K4me1 | 3.66            |
| Inferior temporal lobe*              | CNS              | H3K9ac  | 3.59            |
| Fetal brain*                         | CNS              | H3K9ac  | 3.57            |
| Hippocampus middle*                  | CNS              | H3K9ac  | 3.47            |
| Cingulate gyrus*                     | CNS              | H3K9ac  | 3.46            |
| Hippocampus middle*                  | CNS              | H3K4me3 | 3.4             |
| Germinal matrix*                     | CNS              | H3K4me3 | 3.4             |
| Cingulate gyrus*                     | CNS              | H3K4me3 | 3.4             |
| Anterior caudate*                    | CNS              | H3K4me1 | 3.31            |
| Substantia nigra*                    | CNS              | H3K4me3 | 3.24            |
| Angular gyrus*                       | CNS              | H3K27ac | 3.05            |
| Penis foreskin melanocyte primary*   | Other            | H3K4me3 | 2.83            |
| Angular gyrus*                       | CNS              | H3K4me3 | 2.76            |
| Substantia nigra*                    | CNS              | H3K4me1 | 2.75            |
| Pancreatic islets*                   | Adrenal/Pancreas | H3K4me3 | 2.6             |
| Cingulate gyrus*                     | CNS              | H3K27ac | 2.57            |
| Fetal adrenal*                       | Adrenal/Pancreas | H3K4me3 | 2.57            |
| Angular gyrus*                       | CNS              | H3K9ac  | 2.51            |
| Inferior temporal lobe*              | CNS              | H3K27ac | 2.39            |
| Breast myoepithelial*                | Other            | H3K4me3 | 2.35            |
| Substantia nigra*                    | CNS              | H3K9ac  | 2.26            |
| Substantia nigra*                    | CNS              | H3K27ac | 2.22            |
| Hippocampus middle*                  | CNS              | H3K27ac | 2.07            |

(b) BMI

Supplementary Table 7: Enrichment of top cell types for 17 traits. \* = significant at FDR < 0.05. \*\* = significant at  $p < 0.05$  after correcting for multiple hypotheses.

| Cell type                                         | cell-type group  | Mark    | $-\log_{10}(p)$ |
|---------------------------------------------------|------------------|---------|-----------------|
| Fetal brain**                                     | CNS              | H3K4me3 | 12.25           |
| Pancreatic islets**                               | Adrenal/Pancreas | H3K4me3 | 11.73           |
| Angular gyrus**                                   | CNS              | H3K4me3 | 11.22           |
| Germinal matrix**                                 | CNS              | H3K4me3 | 11.18           |
| Fetal adrenal**                                   | Adrenal/Pancreas | H3K4me3 | 11.12           |
| Mid frontal lobe**                                | CNS              | H3K4me3 | 11.11           |
| Inferior temporal lobe**                          | CNS              | H3K4me3 | 10.22           |
| Cingulate gyrus**                                 | CNS              | H3K4me3 | 9.94            |
| Anterior caudate**                                | CNS              | H3K4me3 | 8.91            |
| Psoas muscle**                                    | Skeletal Muscle  | H3K4me3 | 8.66            |
| Right ventricle**                                 | Cardiovascular   | H3K4me3 | 8.58            |
| Pancreatic islets**                               | Adrenal/Pancreas | H3K9ac  | 7.74            |
| Fetal leg muscle**                                | Skeletal Muscle  | H3K4me3 | 7.71            |
| Pancreas**                                        | Adrenal/Pancreas | H3K4me3 | 7.26            |
| Hippocampus middle**                              | CNS              | H3K4me3 | 7.19            |
| Breast myoepithelial**                            | Other            | H3K4me3 | 6.93            |
| Fetal trunk muscle**                              | Skeletal Muscle  | H3K4me3 | 6.87            |
| Peripheralblood mononuclear primary**             | Immune           | H3K4me3 | 6.66            |
| Penis foreskin melanocyte primary**               | Other            | H3K4me3 | 6.53            |
| Fetal stomach**                                   | GI               | H3K4me3 | 6.26            |
| Gastric**                                         | GI               | H3K4me3 | 6.24            |
| Right atrium**                                    | Cardiovascular   | H3K4me3 | 6.24            |
| CD4+ CD25- CD45RA+ naive primary**                | Immune           | H3K4me3 | 6.16            |
| CD4+ CD25int CD127+ Tmem primary**                | Immune           | H3K4me3 | 5.96            |
| Ovary**                                           | Other            | H3K4me3 | 5.64            |
| Penis foreskin fibroblast primary**               | Connective/Bone  | H3K4me3 | 5.57            |
| Substantia nigra**                                | CNS              | H3K4me3 | 5.41            |
| Esophagus**                                       | GI               | H3K4me3 | 5.35            |
| Colonic mucosa**                                  | GI               | H3K4me3 | 5.3             |
| Fetal large intestine**                           | GI               | H3K4me3 | 5.14            |
| Fetal placenta**                                  | Other            | H3K4me3 | 5.07            |
| Fetal brain**                                     | CNS              | H3K9ac  | 5.05            |
| Aorta*                                            | Cardiovascular   | H3K4me3 | 4.74            |
| CD8 naive primary (BI)*                           | Immune           | H3K4me3 | 4.49            |
| CD14 primary*                                     | Immune           | H3K4me3 | 4.49            |
| Fetal small intestine*                            | GI               | H3K4me3 | 4.43            |
| Breast vHMEC*                                     | Other            | H3K4me3 | 4.39            |
| CD4+ CD25- Th primary*                            | Immune           | H3K4me3 | 4.38            |
| CD34 primary*                                     | Immune           | H3K4me3 | 4.37            |
| Placenta amnion*                                  | Other            | H3K4me3 | 4.34            |
| Angular gyrus*                                    | CNS              | H3K9ac  | 4.33            |
| Penis foreskin keratinocyte primary*              | Other            | H3K4me3 | 4.3             |
| Pancreatic islets*                                | Adrenal/Pancreas | H3K4me3 | 4.26            |
| Mid frontal lobe*                                 | CNS              | H3K9ac  | 4.23            |
| CD4+ CD25- CD45R0+ memory primary*                | Immune           | H3K4me3 | 4.14            |
| Rectal smooth muscle*                             | GI               | H3K4me3 | 4.12            |
| Left Ventricle*                                   | Cardiovascular   | H3K4me3 | 4.11            |
| CD8 memory primary*                               | Immune           | H3K4me3 | 4.06            |
| CD4+ CD25+ CD127- Treg primary*                   | Immune           | H3K4me3 | 4.05            |
| Placenta chorion*                                 | Other            | H3K4me3 | 4.05            |
| CD8 naive primary (UCSF-UBC)*                     | Immune           | H3K4me3 | 3.77            |
| Anterior caudate*                                 | CNS              | H3K9ac  | 3.73            |
| Cingulate gyrus*                                  | CNS              | H3K9ac  | 3.69            |
| CD19 primary (UW)*                                | Immune           | H3K4me3 | 3.63            |
| CD4+ CD25- IL17+ PMA Ionomycin stim Th17 primary* | Immune           | H3K4me3 | 3.58            |
| CD4 naive primary*                                | Immune           | H3K4me3 | 3.53            |
| Fetal brain*                                      | CNS              | H3K4me3 | 3.53            |
| Lung*                                             | Cardiovascular   | H3K4me3 | 3.5             |
| Mid frontal lobe*                                 | CNS              | H3K27ac | 3.43            |
| Breast fibroblast primary*                        | Connective/Bone  | H3K4me3 | 3.41            |

(c) Age at menarche

Supplementary Table 7: Enrichment of top cell types for 17 traits. \* = significant at FDR < 0.05. \*\* = significant at  $p < 0.05$  after correcting for multiple hypotheses.

| Cell type      | cell-type group  | Mark    | $-\log_{10}(p)$ |
|----------------|------------------|---------|-----------------|
| Liver (BI)*    | Liver            | H3K4me1 | 4.76            |
| Fetal adrenal* | Adrenal/Pancreas | H3K4me1 | 3.41            |
| CD14 primary*  | Immune           | H3K4me1 | 3.33            |
| Liver*         | Liver            | H3K27ac | 2.97            |
| Adipose nuclei | Other            | H3K9ac  | 2.71            |

(d) LDL

Supplementary Table 7: Enrichment of top cell types for 17 traits. \* = significant at FDR < 0.05. \*\* = significant at  $p < 0.05$  after correcting for multiple hypotheses.

| Cell type       | cell-type group | Mark    | $-\log_{10}(p)$ |
|-----------------|-----------------|---------|-----------------|
| Liver (BI)*     | Liver           | H3K4me1 | 4.51            |
| Adipose nuclei* | Other           | H3K4me1 | 4.26            |
| Liver*          | Liver           | H3K27ac | 3.61            |
| Adipose nuclei* | Other           | H3K9ac  | 3.34            |
| Adipose nuclei* | Other           | H3K4me3 | 3.08            |
| CD14 primary*   | Immune          | H3K4me1 | 2.86            |
| Adipose nuclei* | Other           | H3K27ac | 2.84            |
| Liver (BI)*     | Liver           | H3K9ac  | 2.74            |
| Liver (BI)*     | Liver           | H3K4me3 | 2.66            |

(e) HDL

Supplementary Table 7: Enrichment of top cell types for 17 traits. \* = significant at FDR < 0.05. \*\* = significant at  $p < 0.05$  after correcting for multiple hypotheses.

| Cell type       | cell-type group | Mark    | $-\log_{10}(p)$ |
|-----------------|-----------------|---------|-----------------|
| Liver (BI)*     | Liver           | H3K4me1 | 3.99            |
| Liver*          | Liver           | H3K27ac | 3.66            |
| Liver (BI)*     | Liver           | H3K9ac  | 3.02            |
| Duodenum Mucosa | GI              | H3K4me3 | 2.71            |
| Liver (UCSD)    | Liver           | H3K4me3 | 2.68            |

(f) Triglycerides

Supplementary Table 7: Enrichment of top cell types for 17 traits. \* = significant at FDR < 0.05. \*\* = significant at  $p < 0.05$  after correcting for multiple hypotheses.

| Cell type        | cell-type group | Mark    | $-\log_{10}(p)$ |
|------------------|-----------------|---------|-----------------|
| Adipose nuclei*  | Other           | H3K4me1 | 4.21            |
| Duodenum Mucosa* | GI              | H3K4me1 | 3.43            |
| Colonic mucosa*  | GI              | H3K9ac  | 3.01            |
| Duodenum Mucosa  | GI              | H3K9ac  | 2.78            |
| Rectal mucosa    | GI              | H3K9ac  | 2.68            |

(g) Coronary artery disease

Supplementary Table 7: Enrichment of top cell types for 17 traits. \* = significant at FDR < 0.05. \*\* = significant at  $p < 0.05$  after correcting for multiple hypotheses.

| Cell type             | cell-type group  | Mark    | $-\log_{10}(p)$ |
|-----------------------|------------------|---------|-----------------|
| Pancreatic islets     | Adrenal/Pancreas | H3K4me3 | 2.87            |
| Pancreatic islets     | Adrenal/Pancreas | H3K27ac | 2.73            |
| Fetal large intestine | GI               | H3K4me1 | 2.49            |
| Fetal small intestine | GI               | H3K4me1 | 2.31            |
| Adipose nuclei        | Other            | H3K9ac  | 2.27            |

(h) Type 2 Diabetes

Supplementary Table 7: Enrichment of top cell types for 17 traits. \* = significant at FDR < 0.05. \*\* = significant at  $p < 0.05$  after correcting for multiple hypotheses.

| Cell type             | cell-type group  | Mark    | $-\log_{10}(p)$ |
|-----------------------|------------------|---------|-----------------|
| Pancreatic islets*    | Adrenal/Pancreas | H3K27ac | 3.93            |
| Pancreatic islets*    | Adrenal/Pancreas | H3K4me1 | 3.1             |
| Pancreatic islets     | Adrenal/Pancreas | H3K4me3 | 2.93            |
| Pancreatic islets     | Adrenal/Pancreas | H3K4me3 | 2.25            |
| Fetal small intestine | GI               | H3K4me1 | 2.18            |

(i) Fasting Glucose

Supplementary Table 7: Enrichment of top cell types for 17 traits. \* = significant at FDR < 0.05. \*\* = significant at  $p < 0.05$  after correcting for multiple hypotheses.

| Cell type                                             | cell-type group  | Mark    | $-\log_{10}(p)$ |
|-------------------------------------------------------|------------------|---------|-----------------|
| Fetal brain**                                         | CNS              | H3K4me3 | 18.51           |
| Mid frontal lobe**                                    | CNS              | H3K4me3 | 14.44           |
| Germinal matrix**                                     | CNS              | H3K4me3 | 12.68           |
| Mid frontal lobe**                                    | CNS              | H3K9ac  | 11.27           |
| Angular gyrus**                                       | CNS              | H3K4me3 | 10.89           |
| Inferior temporal lobe**                              | CNS              | H3K4me3 | 10.77           |
| Cingulate gyrus**                                     | CNS              | H3K9ac  | 10.27           |
| Fetal brain**                                         | CNS              | H3K9ac  | 10.24           |
| Anterior caudate**                                    | CNS              | H3K4me3 | 9.66            |
| Cingulate gyrus**                                     | CNS              | H3K4me3 | 9.34            |
| Pancreatic islets**                                   | Adrenal/Pancreas | H3K4me3 | 8.65            |
| Anterior caudate**                                    | CNS              | H3K9ac  | 8.5             |
| Angular gyrus**                                       | CNS              | H3K9ac  | 8.33            |
| Mid frontal lobe**                                    | CNS              | H3K27ac | 8.1             |
| Anterior caudate**                                    | CNS              | H3K4me1 | 7.92            |
| Inferior temporal lobe**                              | CNS              | H3K4me1 | 7.43            |
| Psoas muscle**                                        | Skeletal Muscle  | H3K4me3 | 7.38            |
| Fetal brain**                                         | CNS              | H3K4me1 | 7.21            |
| Inferior temporal lobe**                              | CNS              | H3K9ac  | 7.03            |
| Hippocampus middle**                                  | CNS              | H3K9ac  | 6.03            |
| Pancreatic islets**                                   | Adrenal/Pancreas | H3K9ac  | 5.79            |
| Penis foreskin melanocyte primary**                   | Other            | H3K4me3 | 5.68            |
| Angular gyrus**                                       | CNS              | H3K27ac | 5.63            |
| Cingulate gyrus**                                     | CNS              | H3K4me1 | 5.55            |
| Hippocampus middle**                                  | CNS              | H3K4me3 | 5.55            |
| CD34 primary**                                        | Immune           | H3K4me3 | 5.33            |
| Sigmoid colon**                                       | GI               | H3K4me3 | 5.3             |
| Fetal adrenal**                                       | Adrenal/Pancreas | H3K4me3 | 5.2             |
| Inferior temporal lobe**                              | CNS              | H3K27ac | 5.08            |
| Peripheralblood mononuclear primary**                 | Immune           | H3K4me3 | 5.03            |
| Gastric**                                             | GI               | H3K4me3 | 4.93            |
| Substantia nigra*                                     | CNS              | H3K4me3 | 4.71            |
| Fetal brain*                                          | CNS              | H3K4me3 | 4.58            |
| Hippocampus middle*                                   | CNS              | H3K4me1 | 4.48            |
| Ovary*                                                | Other            | H3K4me3 | 4.19            |
| CD19 primary (UW)*                                    | Immune           | H3K4me3 | 4.15            |
| Small intestine*                                      | GI               | H3K4me3 | 4.07            |
| Lung*                                                 | Cardiovascular   | H3K4me3 | 3.93            |
| Fetal stomach*                                        | GI               | H3K4me3 | 3.89            |
| Fetal leg muscle*                                     | Skeletal Muscle  | H3K4me3 | 3.82            |
| Spleen*                                               | Immune           | H3K4me3 | 3.77            |
| Breast fibroblast primary*                            | Connective/Bone  | H3K4me3 | 3.69            |
| Right ventricle*                                      | Cardiovascular   | H3K4me3 | 3.67            |
| CD4+ CD25- Th primary*                                | Immune           | H3K4me3 | 3.66            |
| CD4+ CD25- IL17- PMA Ionomycin stim MACS Th sprimary* | Immune           | H3K4me1 | 3.66            |
| CD8 naive primary (UCSF-UBC)*                         | Immune           | H3K4me3 | 3.65            |
| Pancreas*                                             | Adrenal/Pancreas | H3K4me3 | 3.63            |
| CD4+ CD25- Th primary*                                | Immune           | H3K4me1 | 3.56            |
| CD4+ CD25- CD45RA+ naive primary*                     | Immune           | H3K4me1 | 3.56            |
| Colonic mucosa*                                       | GI               | H3K4me3 | 3.49            |
| Right atrium*                                         | Cardiovascular   | H3K4me3 | 3.48            |
| Fetal trunk muscle*                                   | Skeletal Muscle  | H3K4me3 | 3.47            |
| CD4+ CD25int CD127+ Tmem primary*                     | Immune           | H3K4me3 | 3.46            |
| Substantia nigra*                                     | CNS              | H3K9ac  | 3.44            |
| Placenta amnion*                                      | Other            | H3K4me3 | 3.38            |
| Breast myoepithelial*                                 | Other            | H3K9ac  | 3.26            |
| CD8 naive primary (BI)*                               | Immune           | H3K4me1 | 3.24            |
| Substantia nigra*                                     | CNS              | H3K4me1 | 3.18            |
| Cingulate gyrus*                                      | CNS              | H3K27ac | 3.1             |
| CD4+ CD25- CD45RA+ naive primary*                     | Immune           | H3K4me3 | 3.06            |

(j) Schizophrenia

Supplementary Table 7: Enrichment of top cell types for 17 traits. \* = significant at FDR < 0.05. \*\* = significant at p < 0.05 after correcting for multiple hypotheses.

| Cell type                           | cell-type group | Mark    | $-\log_{10}(p)$ |
|-------------------------------------|-----------------|---------|-----------------|
| Mid frontal lobe*                   | CNS             | H3K27ac | 4.42            |
| Penis foreskin keratinocyte primary | Other           | H3K9ac  | 3.05            |
| Fetal brain                         | CNS             | H3K9ac  | 2.92            |
| Fetal brain                         | CNS             | H3K4me3 | 2.9             |
| Mid frontal lobe                    | CNS             | H3K4me3 | 2.78            |

(k) Bipolar disorder

Supplementary Table 7: Enrichment of top cell types for 17 traits. \* = significant at FDR < 0.05. \*\* = significant at  $p < 0.05$  after correcting for multiple hypotheses.

| Cell type        | cell-type group | Mark    | $-\log_{10}(p)$ |
|------------------|-----------------|---------|-----------------|
| Angular gyrus    | CNS             | H3K9ac  | 2.61            |
| Mid frontal lobe | CNS             | H3K9ac  | 2.38            |
| Mid frontal lobe | CNS             | H3K4me1 | 2.36            |
| Anterior caudate | CNS             | H3K9ac  | 2.28            |
| Cingulate gyrus  | CNS             | H3K9ac  | 2.22            |

(l) Anorexia

Supplementary Table 7: Enrichment of top cell types for 17 traits. \* = significant at FDR < 0.05. \*\* = significant at  $p < 0.05$  after correcting for multiple hypotheses.



| Cell type                            | cell-type group  | Mark    | $-\log_{10}(p)$ |
|--------------------------------------|------------------|---------|-----------------|
| Angular gyrus**                      | CNS              | H3K4me3 | 6.63            |
| Fetal brain**                        | CNS              | H3K4me3 | 6.05            |
| Mid frontal lobe**                   | CNS              | H3K4me3 | 5.99            |
| Anterior caudate**                   | CNS              | H3K4me3 | 5.73            |
| Inferior temporal lobe**             | CNS              | H3K4me3 | 5.63            |
| CD56 primary**                       | Immune           | H3K4me3 | 5.32            |
| Germinal matrix**                    | CNS              | H3K4me3 | 5.29            |
| Mid frontal lobe**                   | CNS              | H3K9ac  | 5.26            |
| Cingulate gyrus**                    | CNS              | H3K9ac  | 4.98            |
| Cingulate gyrus**                    | CNS              | H3K4me3 | 4.94            |
| CD8 naive primary (UCSF-UBC)**       | Immune           | H3K4me3 | 4.88            |
| Penis foreskin melanocyte primary*   | Other            | H3K4me3 | 4.73            |
| Mid frontal lobe*                    | CNS              | H3K27ac | 4.43            |
| Peripheralblood mononuclear primary* | Immune           | H3K4me3 | 4.39            |
| CD34 primary*                        | Immune           | H3K4me3 | 4.12            |
| Fetal brain*                         | CNS              | H3K9ac  | 4.03            |
| CD14 primary*                        | Immune           | H3K4me3 | 4.01            |
| Inferior temporal lobe*              | CNS              | H3K9ac  | 3.98            |
| Angular gyrus*                       | CNS              | H3K9ac  | 3.96            |
| Sigmoid colon*                       | GI               | H3K4me3 | 3.83            |
| Pancreatic islets*                   | Adrenal/Pancreas | H3K9ac  | 3.83            |
| CD4+ CD25int CD127+ Tmem primary*    | Immune           | H3K4me3 | 3.72            |
| Anterior caudate*                    | CNS              | H3K9ac  | 3.65            |
| Hippocampus middle*                  | CNS              | H3K4me3 | 3.65            |
| CD19 primary (UW)*                   | Immune           | H3K4me3 | 3.63            |
| Small intestine*                     | GI               | H3K4me3 | 3.52            |
| CD4+ CD25- Th primary*               | Immune           | H3K4me3 | 3.45            |
| Lung*                                | Cardiovascular   | H3K4me3 | 3.19            |
| CD4+ CD25- CD45R0+ memory primary*   | Immune           | H3K4me3 | 3.19            |
| Hippocampus middle*                  | CNS              | H3K9ac  | 3.17            |
| Liver (UCSD)*                        | Liver            | H3K4me3 | 3.08            |
| Fetal placenta*                      | Other            | H3K4me3 | 3.08            |
| Fetal adrenal*                       | Adrenal/Pancreas | H3K4me3 | 3.04            |
| Right atrium*                        | Cardiovascular   | H3K4me3 | 2.99            |
| Pancreatic islets*                   | Adrenal/Pancreas | H3K4me3 | 2.96            |
| CD8 naive primary (UCSF-UBC)*        | Immune           | H3K9ac  | 2.95            |
| CD3 primary (BI)*                    | Immune           | H3K4me3 | 2.94            |
| Angular gyrus*                       | CNS              | H3K27ac | 2.93            |
| CD4+ CD25- CD45RA+ naive primary*    | Immune           | H3K4me3 | 2.93            |
| Gastric*                             | GI               | H3K4me3 | 2.92            |
| CD4 naive primary*                   | Immune           | H3K4me3 | 2.89            |
| CD8 memory primary*                  | Immune           | H3K4me3 | 2.78            |
| CD3 primary (UW)*                    | Immune           | H3K4me3 | 2.76            |
| Rectal smooth muscle*                | GI               | H3K4me3 | 2.73            |
| Fetal brain*                         | CNS              | H3K4me3 | 2.67            |
| Esophagus*                           | GI               | H3K4me3 | 2.66            |
| CD8 naive primary (BI)*              | Immune           | H3K4me3 | 2.58            |
| Left Ventricle*                      | Cardiovascular   | H3K4me3 | 2.56            |
| CD19 primary (BI)*                   | Immune           | H3K4me3 | 2.56            |
| Fetal thymus*                        | Immune           | H3K4me3 | 2.52            |
| Breast vHMEC*                        | Other            | H3K4me3 | 2.51            |
| CD8 primary*                         | Immune           | H3K4me3 | 2.51            |
| Psoas muscle*                        | Skeletal Muscle  | H3K4me3 | 2.51            |
| Peripheralblood mononuclear primary* | Immune           | H3K9ac  | 2.5             |
| Ovary*                               | Other            | H3K4me3 | 2.47            |
| Pancreas*                            | Adrenal/Pancreas | H3K4me3 | 2.46            |
| Breast fibroblast primary*           | Connective/Bone  | H3K4me3 | 2.45            |
| CD4+ CD25+ CD127- Treg primary*      | Immune           | H3K4me3 | 2.36            |
| Placenta amnion*                     | Other            | H3K4me3 | 2.34            |
| Right ventricle*                     | Cardiovascular   | H3K4me3 | 2.33            |

(m) Years of education

Supplementary Table 7: Enrichment of top cell types for 17 traits. \* = significant at FDR < 0.05. \*\* = significant at  $p < 0.05$  after correcting for multiple hypotheses.

| Cell type               | cell-type group  | Mark    | $-\log_{10}(p)$ |
|-------------------------|------------------|---------|-----------------|
| Inferior temporal lobe* | CNS              | H3K4me3 | 3.21            |
| Cingulate gyrus*        | CNS              | H3K27ac | 3.2             |
| Substantia nigra*       | CNS              | H3K27ac | 3.16            |
| Hippocampus middle*     | CNS              | H3K27ac | 3.13            |
| Breast myoepithelial*   | Other            | H3K9ac  | 3.06            |
| Inferior temporal lobe* | CNS              | H3K4me1 | 2.93            |
| Anterior caudate*       | CNS              | H3K27ac | 2.81            |
| Inferior temporal lobe* | CNS              | H3K27ac | 2.81            |
| Angular gyrus*          | CNS              | H3K27ac | 2.77            |
| Pancreatic islets*      | Adrenal/Pancreas | H3K4me1 | 2.55            |

(n) Ever smoked

Supplementary Table 7: Enrichment of top cell types for 17 traits. \* = significant at FDR < 0.05. \*\* = significant at p < 0.05 after correcting for multiple hypotheses.

| Cell type                                              | cell-type group | Mark    | $-\log_{10}(p)$ |
|--------------------------------------------------------|-----------------|---------|-----------------|
| CD4+ CD25- IL17+ PMA Ionomycin stim Th17 primary**     | Immune          | H3K4me1 | 6.76            |
| CD4+ CD25- IL17- PMA Ionomycin stim MACS Th sprimary** | Immune          | H3K4me1 | 6.11            |
| CD4+ CD25- CD45R0+ memory primary**                    | Immune          | H3K4me1 | 5.92            |
| CD4 memory primary**                                   | Immune          | H3K4me1 | 5.88            |
| CD4+ CD25+ CD127- Treg primary**                       | Immune          | H3K4me1 | 5.83            |
| CD25- IL17- Th stim MACS**                             | Immune          | H3K27ac | 5.7             |
| Th2**                                                  | Immune          | H3K27ac | 5.5             |
| CD8 memory primary**                                   | Immune          | H3K4me1 | 5.38            |
| CD4 naive primary**                                    | Immune          | H3K4me1 | 5.26            |
| CD4+ CD25- Th primary**                                | Immune          | H3K4me1 | 5.25            |
| CD19 primary (UW)**                                    | Immune          | H3K4me1 | 5.25            |
| CD4+ CD25int CD127+ Tmem primary**                     | Immune          | H3K4me1 | 4.88            |
| CD4+ CD25- CD45RA+ naive primary*                      | Immune          | H3K4me1 | 4.75            |
| CD3 primary (BI)*                                      | Immune          | H3K4me1 | 4.64            |
| CD3 primary (UW)*                                      | Immune          | H3K4me1 | 4.63            |
| CD25- IL17+ Th17 stim*                                 | Immune          | H3K27ac | 4.55            |
| CD8 naive primary (UCSF-UBC)*                          | Immune          | H3K4me1 | 4.49            |
| CD8 naive primary (BI)*                                | Immune          | H3K4me1 | 4.45            |
| Th0*                                                   | Immune          | H3K27ac | 4.09            |
| CD25+ CD127- Treg*                                     | Immune          | H3K27ac | 4.09            |
| Th1*                                                   | Immune          | H3K27ac | 3.96            |
| CD19 primary (BI)*                                     | Immune          | H3K4me1 | 3.91            |
| CD56 primary*                                          | Immune          | H3K4me1 | 3.77            |
| Treg primary*                                          | Immune          | H3K4me3 | 3.63            |
| CD3 primary*                                           | Immune          | H3K27ac | 3.62            |
| CD20*                                                  | Immune          | H3K27ac | 3.45            |
| CD4+ CD25- IL17- PMA Ionomycin stim MACS Th sprimary*  | Immune          | H3K4me3 | 3.45            |
| CD4+ CD25- IL17+ PMA Ionomycin stim Th17 primary*      | Immune          | H3K4me3 | 3.17            |
| CD4+ CD25+ CD127- Treg primary*                        | Immune          | H3K4me3 | 3.1             |
| CD4+ CD25int CD127+ Tmem primary*                      | Immune          | H3K4me3 | 2.76            |
| Peripheralblood mononuclear primary*                   | Immune          | H3K9ac  | 2.58            |
| CD25int CD127+ Tmem*                                   | Immune          | H3K27ac | 2.27            |
| CD4+ CD25- CD45R0+ memory primary*                     | Immune          | H3K4me3 | 2.24            |
| CD4+ CD25- CD45RA+ naive primary*                      | Immune          | H3K4me3 | 2.2             |
| CD8 memory primary*                                    | Immune          | H3K4me3 | 2.17            |
| CD19*                                                  | Immune          | H3K27ac | 2.13            |
| CD4 memory primary*                                    | Immune          | H3K4me3 | 2.12            |
| Peripheralblood mononuclear primary*                   | Immune          | H3K4me1 | 2.12            |
| CD4+ CD25- Th primary*                                 | Immune          | H3K4me3 | 1.98            |

(o) Rheumatoid arthritis

Supplementary Table 7: Enrichment of top cell types for 17 traits. \* = significant at FDR < 0.05. \*\* = significant at p < 0.05 after correcting for multiple hypotheses.

| Cell type                                              | cell-type group | Mark    | $-\log_{10}(p)$ |
|--------------------------------------------------------|-----------------|---------|-----------------|
| CD4+ CD25- IL17+ PMA Ionomycin stim Th17 primary**     | Immune          | H3K4me1 | 7.59            |
| Th1**                                                  | Immune          | H3K27ac | 6.54            |
| CD25- IL17+ Th17 stim**                                | Immune          | H3K27ac | 6.5             |
| CD4+ CD25- IL17- PMA Ionomycin stim MACS Th sprimary** | Immune          | H3K4me1 | 6.24            |
| CD4 memory primary**                                   | Immune          | H3K4me1 | 5.88            |
| Th2**                                                  | Immune          | H3K27ac | 5.87            |
| CD4+ CD25- Th primary**                                | Immune          | H3K4me1 | 5.59            |
| CD8 memory primary**                                   | Immune          | H3K4me1 | 5.13            |
| CD14 primary**                                         | Immune          | H3K4me1 | 5.03            |
| CD3 primary (UW)**                                     | Immune          | H3K4me1 | 4.96            |
| Th0*                                                   | Immune          | H3K27ac | 4.8             |
| CD56 primary*                                          | Immune          | H3K4me1 | 4.8             |
| CD25- IL17- Th stim MACS*                              | Immune          | H3K27ac | 4.72            |
| CD4+ CD25- CD45R0+ memory primary*                     | Immune          | H3K4me1 | 4.7             |
| CD4 naive primary*                                     | Immune          | H3K4me1 | 4.51            |
| CD4+ CD25int CD127+ Tmem primary*                      | Immune          | H3K4me1 | 4.44            |
| CD4+ CD25- CD45RA+ naive primary*                      | Immune          | H3K4me1 | 4.36            |
| CD8 naive primary (BI)*                                | Immune          | H3K4me1 | 4.31            |
| CD19 primary (UW)*                                     | Immune          | H3K4me1 | 4.26            |
| CD8 naive primary (UCSF-UBC)*                          | Immune          | H3K4me1 | 4.2             |
| CD4+ CD25- IL17+ PMA Ionomycin stim Th17 primary*      | Immune          | H3K4me3 | 4.18            |
| CD19 primary (BI)*                                     | Immune          | H3K4me1 | 4.17            |
| CD3 primary (BI)*                                      | Immune          | H3K4me1 | 3.73            |
| CD4+ CD25+ CD127- Treg primary*                        | Immune          | H3K4me1 | 3.62            |
| CD3 primary*                                           | Immune          | H3K27ac | 3.25            |
| CD4+ CD25- IL17- PMA Ionomycin stim MACS Th sprimary*  | Immune          | H3K4me3 | 3.16            |
| CD34 primary*                                          | Immune          | H3K4me1 | 2.87            |
| Peripheralblood mononuclear primary*                   | Immune          | H3K9ac  | 2.87            |
| CD15 primary*                                          | Immune          | H3K4me1 | 2.85            |
| Spleen*                                                | Immune          | H3K4me1 | 2.7             |
| CD4 primary*                                           | Immune          | H3K4me3 | 2.49            |
| Peripheralblood mononuclear primary*                   | Immune          | H3K4me1 | 2.46            |
| CD8 primary*                                           | Immune          | H3K4me3 | 2.44            |
| CD14*                                                  | Immune          | H3K27ac | 2.18            |
| CD4 memory primary*                                    | Immune          | H3K4me3 | 2.12            |
| Colonic mucosa*                                        | GI              | H3K4me1 | 2.11            |
| CD19 primary (BI)*                                     | Immune          | H3K4me3 | 2.1             |
| CD4 naive primary*                                     | Immune          | H3K4me3 | 2.09            |
| Mobilized CD34 primary*                                | Immune          | H3K4me1 | 2.08            |
| CD25int CD127+ Tmem*                                   | Immune          | H3K27ac | 2.04            |

(p) Crohn's disease

Supplementary Table 7: Enrichment of top cell types for 17 traits. \* = significant at FDR < 0.05. \*\* = significant at  $p < 0.05$  after correcting for multiple hypotheses.

| Cell type                                             | cell-type group | Mark    | $-\log_{10}(p)$ |
|-------------------------------------------------------|-----------------|---------|-----------------|
| CD4+ CD25- IL17+ PMA Ionomycin stim Th17 primary**    | Immune          | H3K4me1 | 6.37            |
| CD25- IL17+ Th17 stim**                               | Immune          | H3K27ac | 5.53            |
| CD4+ CD25- CD45R0+ memory primary**                   | Immune          | H3K4me1 | 5.48            |
| CD4 memory primary**                                  | Immune          | H3K4me1 | 5.19            |
| CD4+ CD25+ CD127- Treg primary**                      | Immune          | H3K4me1 | 4.88            |
| CD4+ CD25- IL17- PMA Ionomycin stim MACS Th sprimary* | Immune          | H3K4me1 | 4.73            |
| CD3 primary*                                          | Immune          | H3K27ac | 4.72            |
| Th2*                                                  | Immune          | H3K27ac | 4.5             |
| CD25+ CD127- Treg*                                    | Immune          | H3K27ac | 4.42            |
| Colonic mucosa*                                       | GI              | H3K4me1 | 4.17            |
| Spleen*                                               | Immune          | H3K4me1 | 4.06            |
| CD4+ CD25- IL17+ PMA Ionomycin stim Th17 primary*     | Immune          | H3K4me3 | 4.04            |
| CD4+ CD25- Th primary*                                | Immune          | H3K4me1 | 4.03            |
| Colonic mucosa*                                       | GI              | H3K27ac | 4.0             |
| Th1*                                                  | Immune          | H3K27ac | 3.96            |
| CD4 naive primary*                                    | Immune          | H3K4me1 | 3.91            |
| CD4+ CD25int CD127+ Tmem primary*                     | Immune          | H3K4me1 | 3.87            |
| CD8 memory primary*                                   | Immune          | H3K4me1 | 3.84            |
| Rectal mucosa*                                        | GI              | H3K4me1 | 3.74            |
| CD19 primary (UW)*                                    | Immune          | H3K4me1 | 3.72            |
| Colonic mucosa*                                       | GI              | H3K9ac  | 3.63            |
| Rectal mucosa*                                        | GI              | H3K9ac  | 3.57            |
| CD25- IL17- Th stim MACS*                             | Immune          | H3K27ac | 3.54            |
| CD25int CD127+ Tmem*                                  | Immune          | H3K27ac | 3.45            |
| Th0*                                                  | Immune          | H3K27ac | 3.44            |
| CD8 naive primary (UCSF-UBC)*                         | Immune          | H3K4me1 | 3.43            |
| CD56 primary*                                         | Immune          | H3K4me1 | 3.21            |
| Rectal mucosa*                                        | GI              | H3K27ac | 3.16            |
| CD19 primary (BI)*                                    | Immune          | H3K4me1 | 2.95            |
| Treg primary*                                         | Immune          | H3K4me3 | 2.93            |
| CD8 naive primary (BI)*                               | Immune          | H3K4me1 | 2.91            |
| CD3 primary (UW)*                                     | Immune          | H3K4me1 | 2.83            |
| CD4+ CD25- CD45RA+ naive primary*                     | Immune          | H3K4me1 | 2.7             |
| CD3 primary (BI)*                                     | Immune          | H3K4me1 | 2.44            |
| Rectal mucosa*                                        | GI              | H3K4me3 | 2.29            |
| CD4+ CD25- IL17- PMA Ionomycin stim MACS Th sprimary* | Immune          | H3K4me3 | 2.24            |
| Duodenum smooth muscle*                               | GI              | H3K27ac | 2.17            |
| Duodenum Mucosa*                                      | GI              | H3K4me1 | 2.15            |
| CD34 primary*                                         | Immune          | H3K4me1 | 2.12            |

(q) Ulcerative colitis

Supplementary Table 7: Enrichment of top cell types for 17 traits. \* = significant at FDR < 0.05. \*\* = significant at  $p < 0.05$  after correcting for multiple hypotheses.

| Phenotype               | Heritability z-score |
|-------------------------|----------------------|
| Type 2 Diabetes         | 8.12                 |
| Ever smoked             | 8.42                 |
| Coronary artery disease | 8.71                 |
| Ulcerative colitis      | 8.81                 |
| Bipolar disorder        | 8.81                 |
| Triglycerides           | 9.45                 |
| LDL                     | 9.49                 |
| Crohn's disease         | 10.12                |
| Anorexia                | 10.44                |
| HDL                     | 11.11                |
| Years of education      | 11.59                |
| BMI                     | 16.79                |
| Age at menarche         | 16.84                |
| Height                  | 18.89                |
| Schizophrenia           | 21.29                |
| Rheumatoid arthritis    | 9.05                 |
| Fasting Glucose         | 7.68                 |

Supplementary Table 8: Heritability z-scores for the 17 traits analyzed in the manuscript

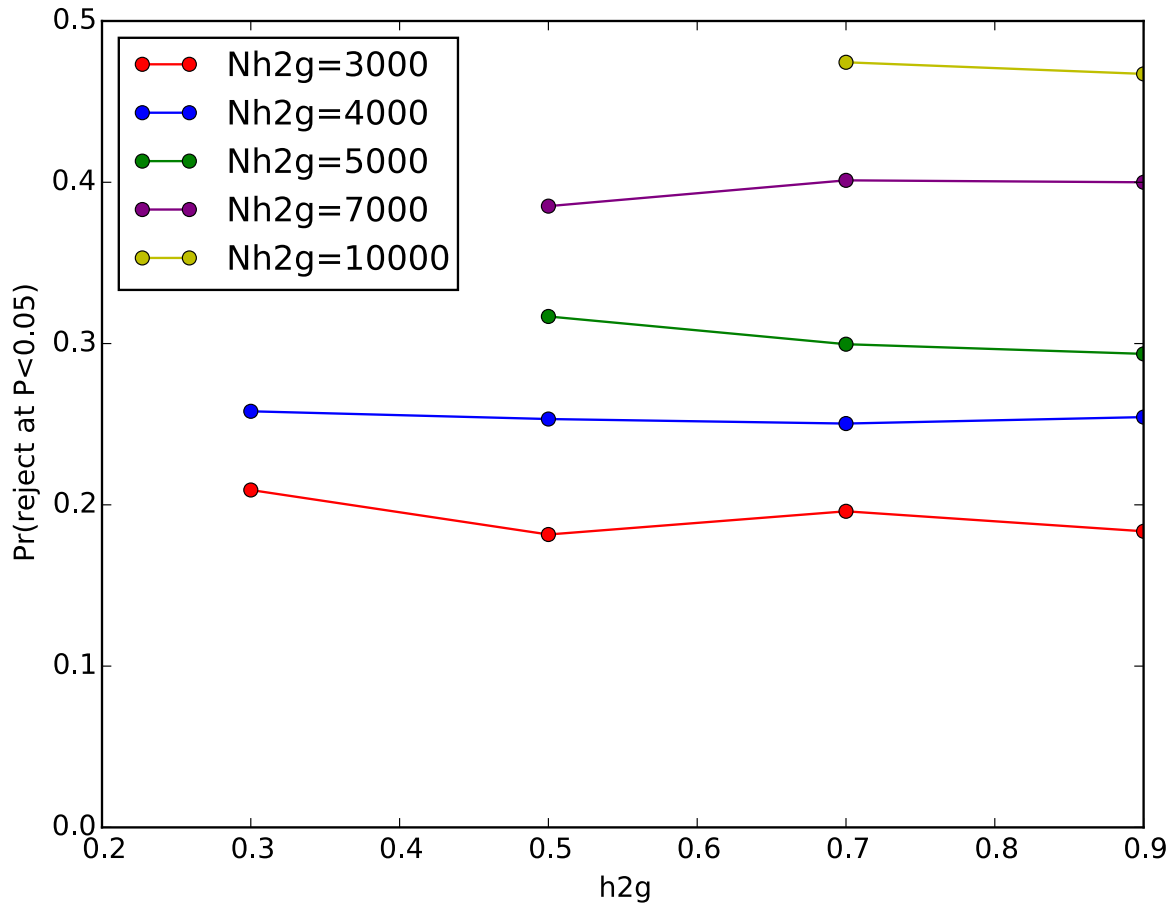

Supplementary Figure 1:  $N$  and  $h_g^2$  affect power only through  $N \cdot h_g^2$ . Sample size is varied to keep  $N \cdot h_g^2$  constant as  $h_g^2$  varies. Power stays constant for a given value of  $N \cdot h_g^2$ .

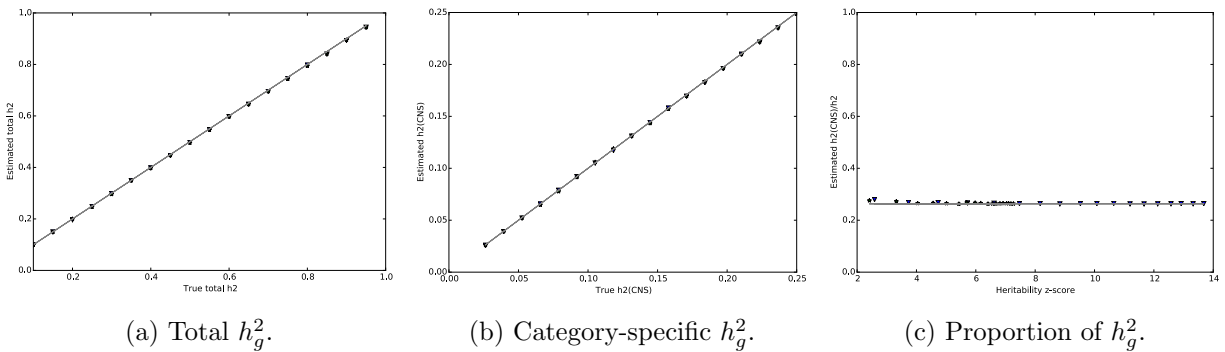

Supplementary Figure 2: Lack of bias in the presence of enrichment. In these simulations, total  $h_g^2$  and proportion of SNPs causal are varied while keeping the proportion of heritability in the tested category constant. The standard error of the mean of each data point is below 0.002.

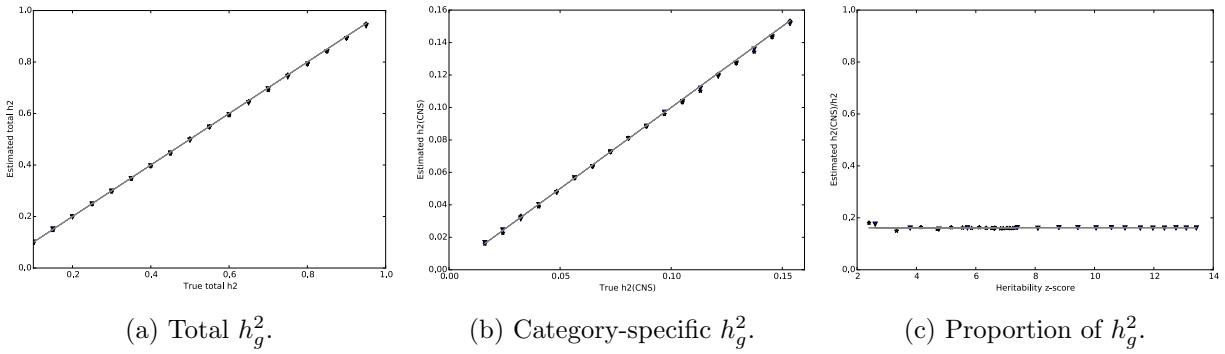

Supplementary Figure 3: Lack of bias in null simulations. In these simulations, total  $h_g^2$  and proportion of SNPs causal are varied. There is no enrichment in these simulations. The standard error of the mean of each data point is below 0.001.

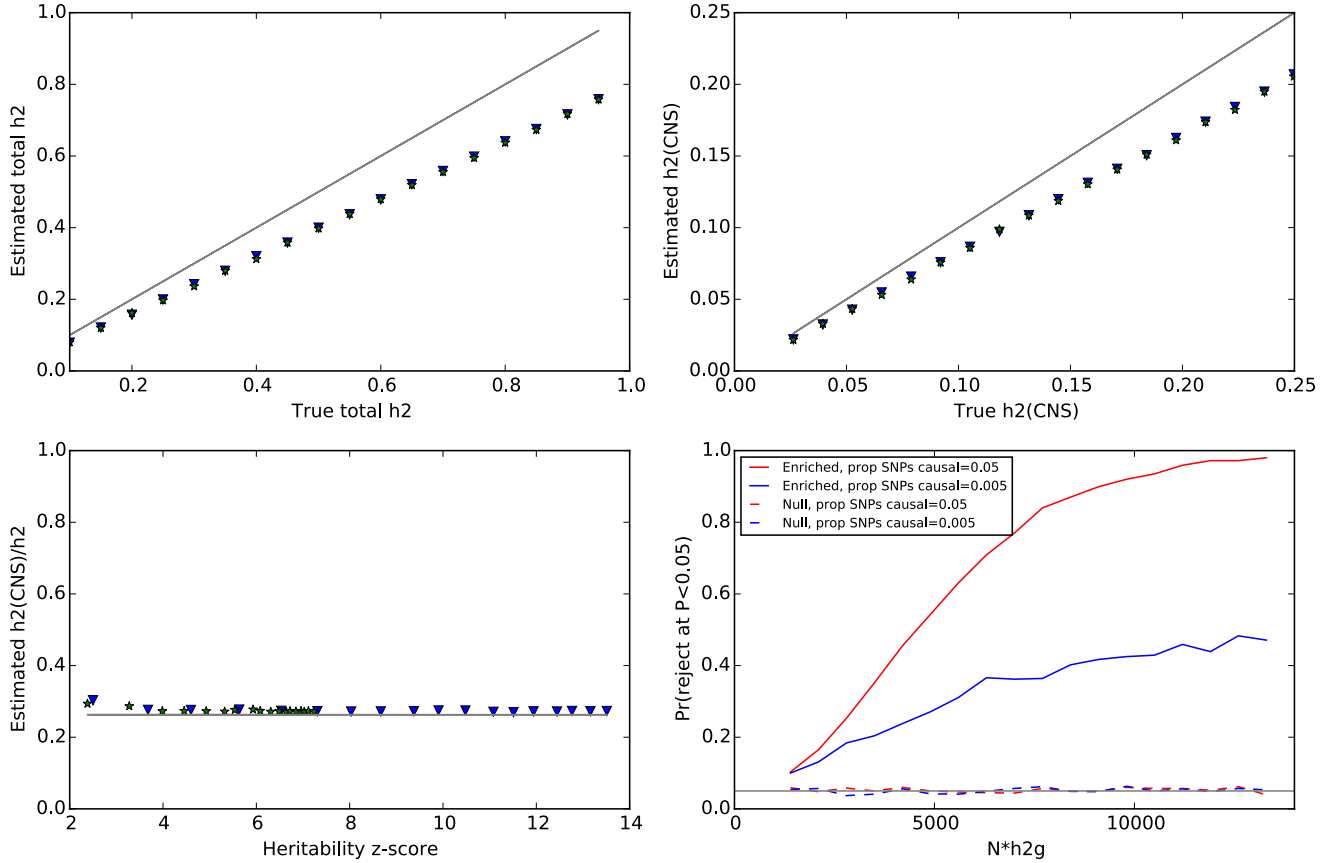

Supplementary Figure 4: Bias and power with an out-of-sample reference panel. In these simulations, WTCCC1 genotypes were used to generate the phenotypes, and stratified LD score regression was run using a 1000G reference panel of European samples, including GBR, FIN, IBS, CEU, and TSI populations.

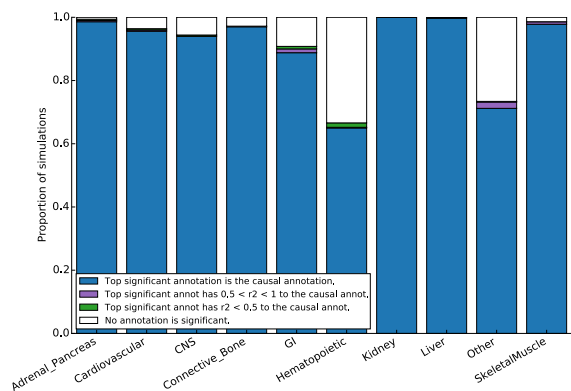

(a) High enrichment.

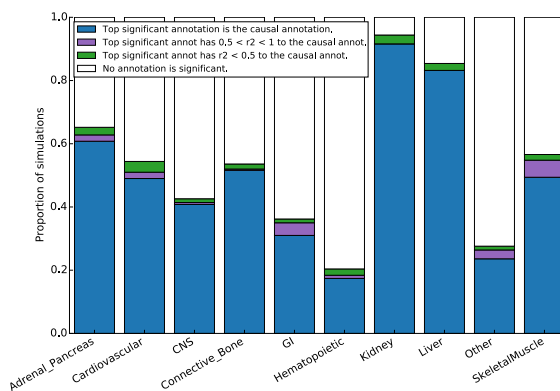

(b) Low enrichment.

Supplementary Figure 5: Results of Figure 3, broken down by cell-type group.

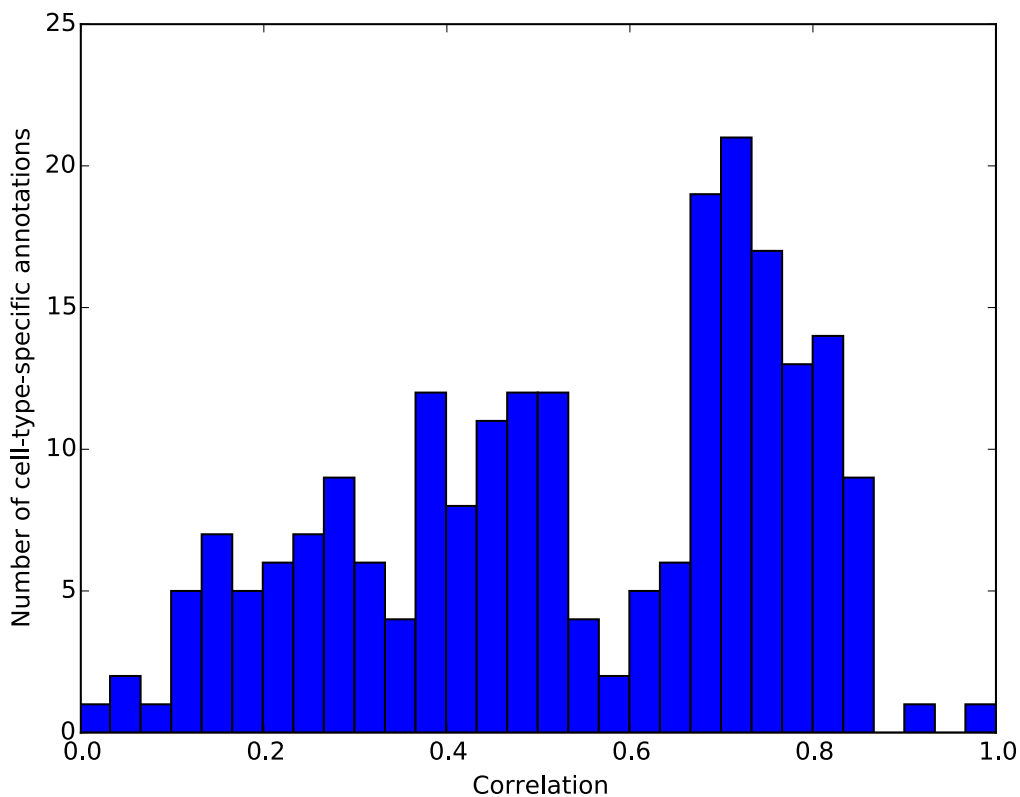

Supplementary Figure 6: Histogram of the correlations of all cell-type-specific annotations with H3K4me3 in Fetal Brain.



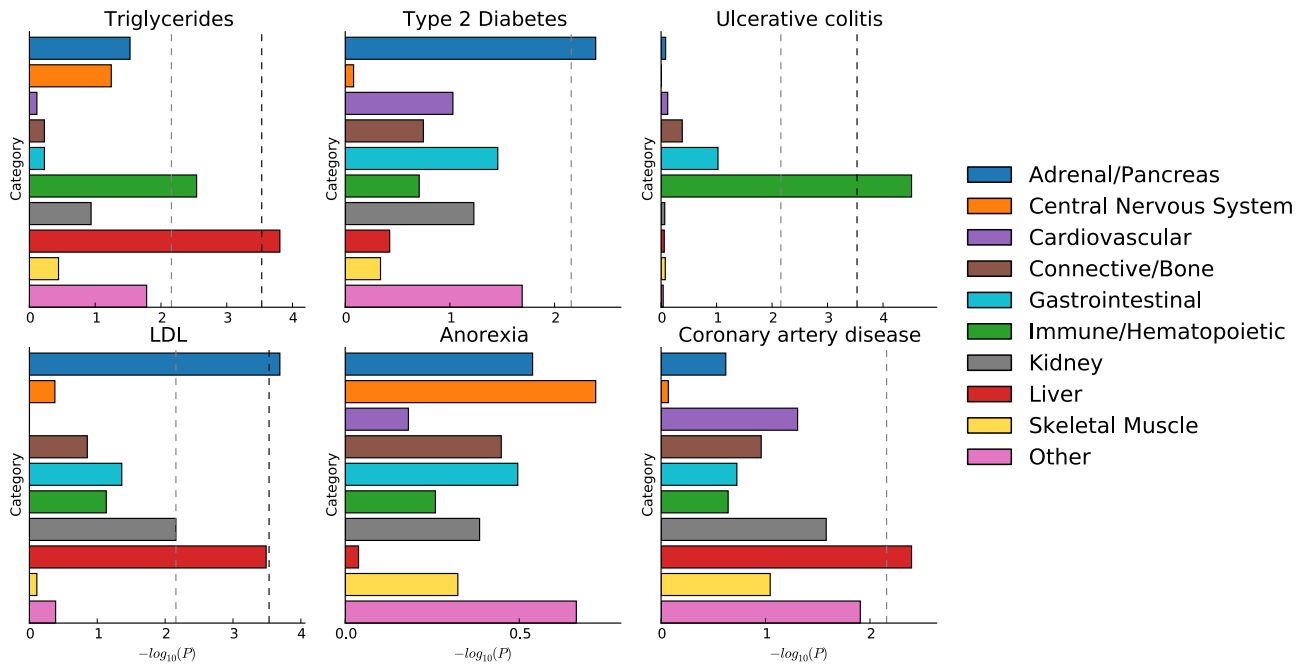

Supplementary Figure 7: Enrichment of cell-type groups for traits not included in Figure 6. The black dotted line at  $-\log_{10}(P) = 3.5$  is the cutoff for Bonferroni significance. The grey dotted line at  $-\log_{10}(P) = 2.1$  is the cutoff for FDR < 0.05.

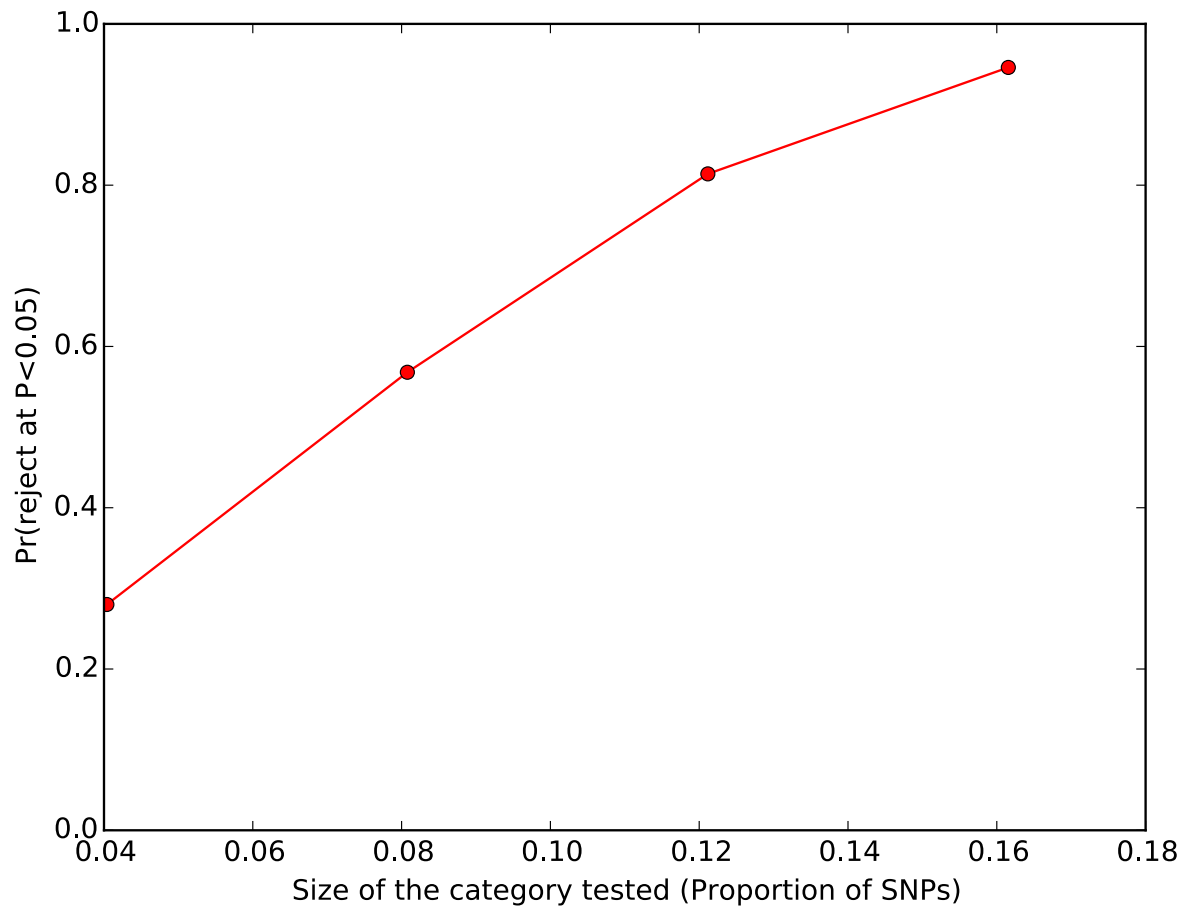

Supplementary Figure 8: Power as a function of category size. Each point represents a rejection probability over 500 simulations. Baseline enrichment and enrichment in the tested category remain constant as the size of the category changes. All simulations have  $h_g^2 = 0.7$ ,  $N = 14000$ ,  $p_{causal} = 0.05$ .

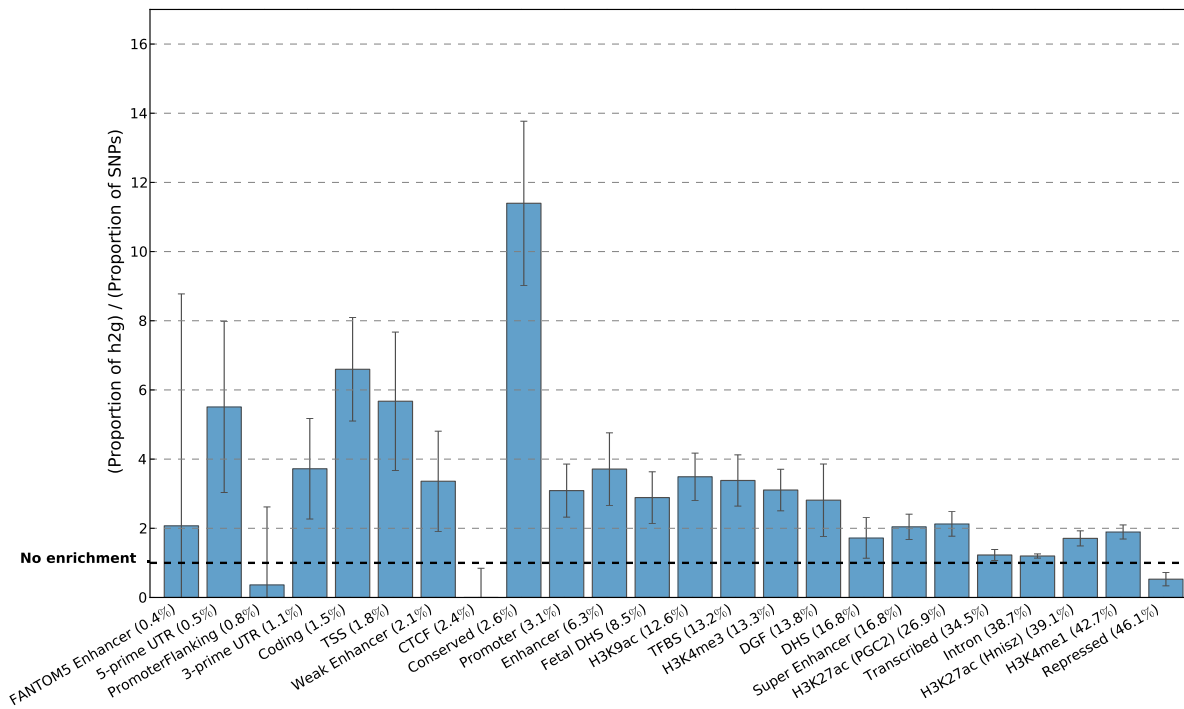

Supplementary Figure 9: Enrichment of baseline categories, meta-analyzed over all 17 traits. The standard errors in this analysis are artificially low due to correlated traits such as HDL/LDL/Triglycerides being treated as independent. Results meta-analyzed over nine independent traits are reported in Figure 4.
